# Supplementary material
Source: PubMed Central journal article supplement (PMC7255059)

**Supplementary Dataset 1. P-value and Regional LD for each lead SNP from Supplementary Table 3.**

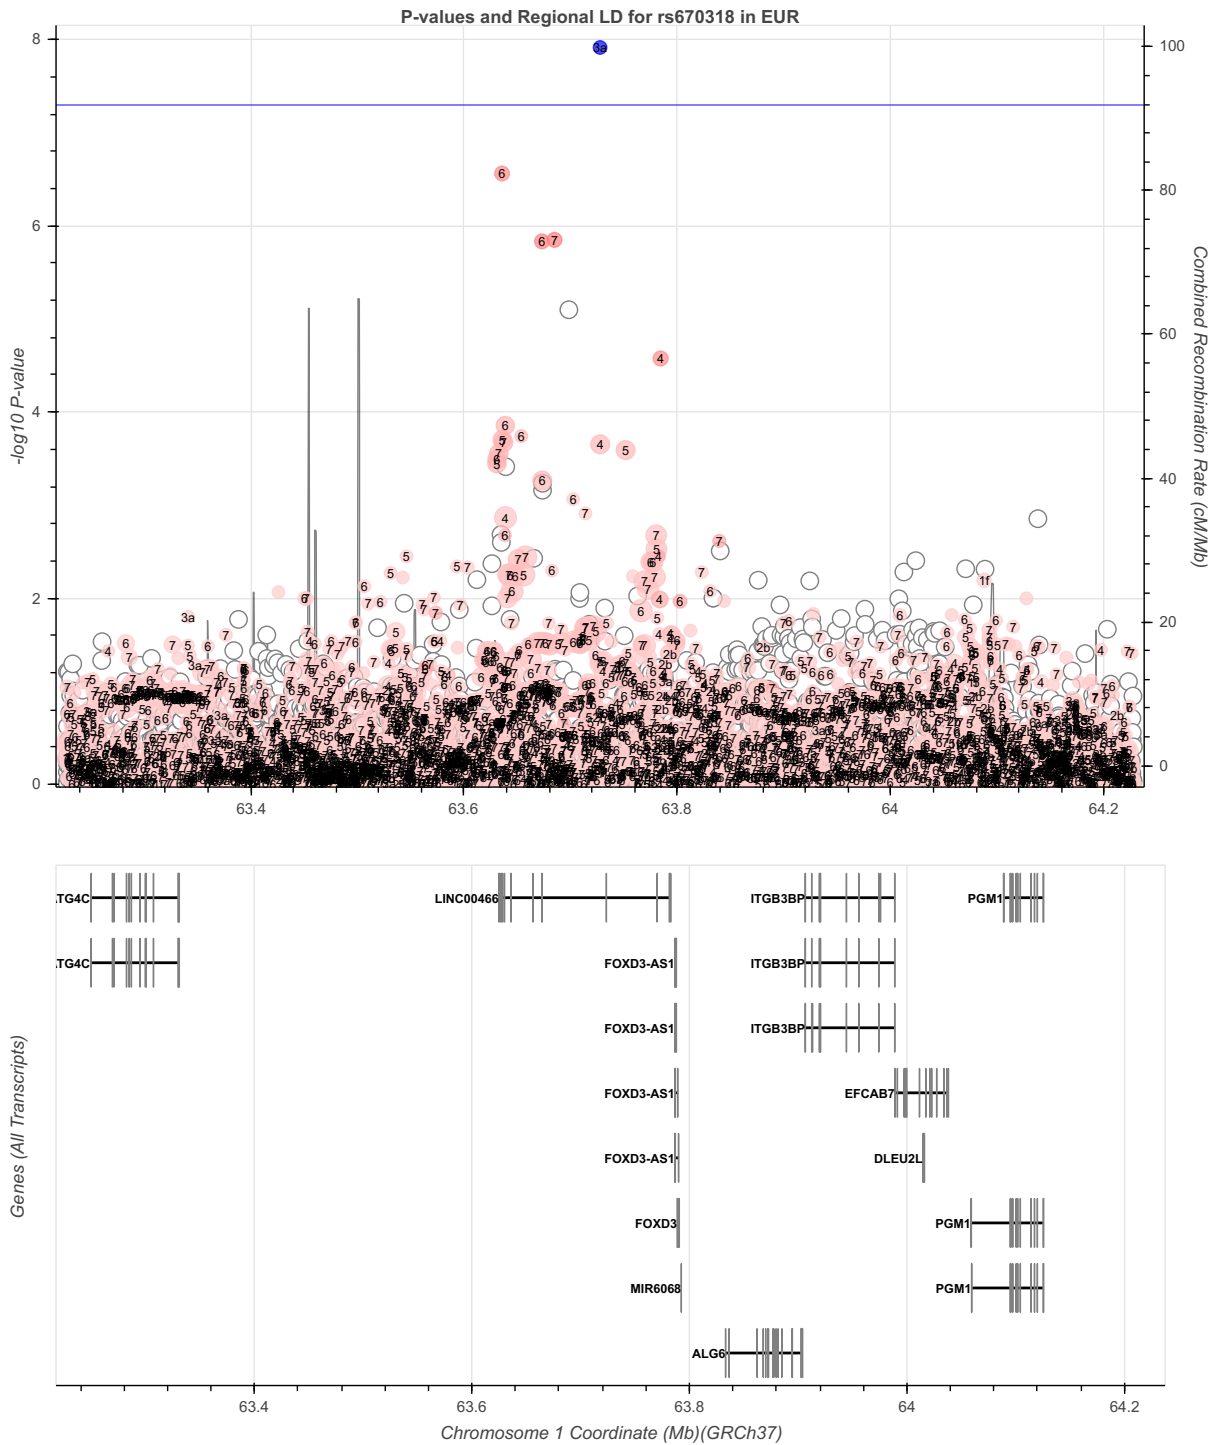

Regional association P-values and linkage disequilibrium patterns for identified CM susceptibility regions. Top panel plots  $-\log_{10}$  association P-values from the total CM fixed-effects meta-analysis. Blue dot is the most significant regional variant and points above blue line indicate association P-values  $< 5 \times 10^{-8}$ . Darker shades of red indicate higher linkage disequilibrium with most significant regional variant. Bottom panel displays nearby genes. Legend applies to all subsequent plots.





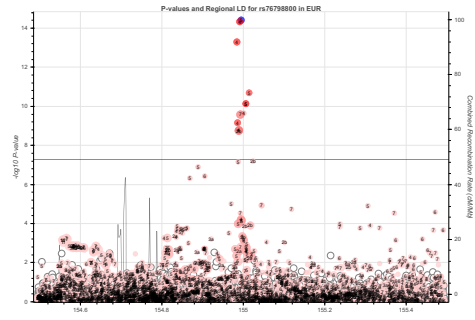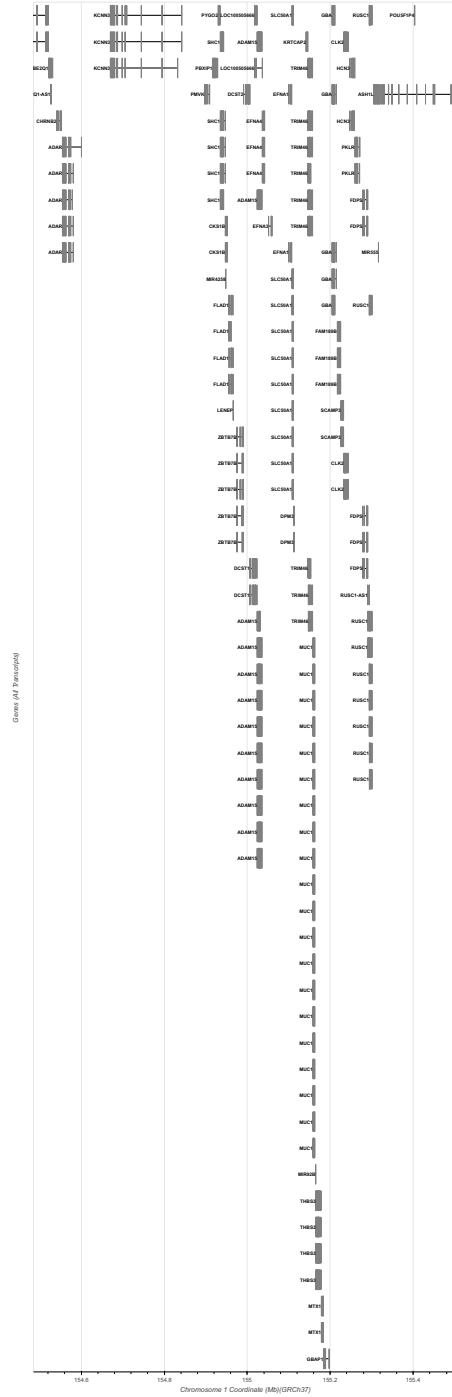

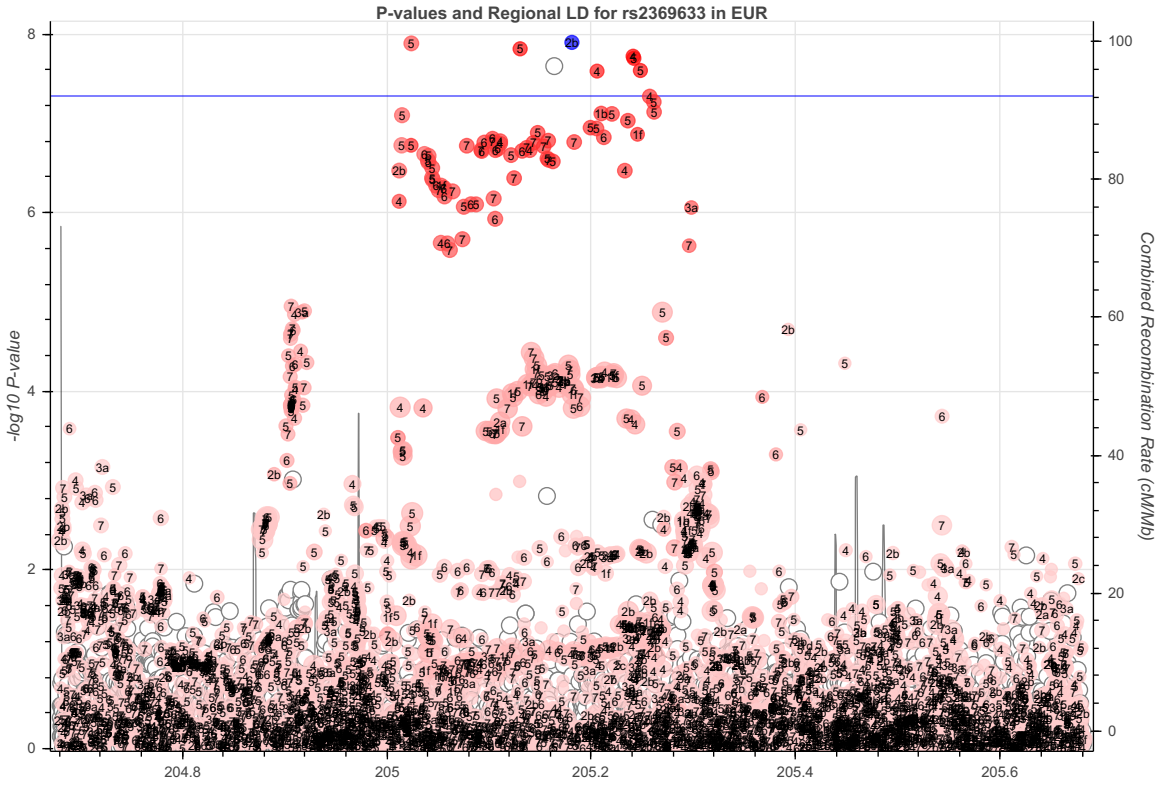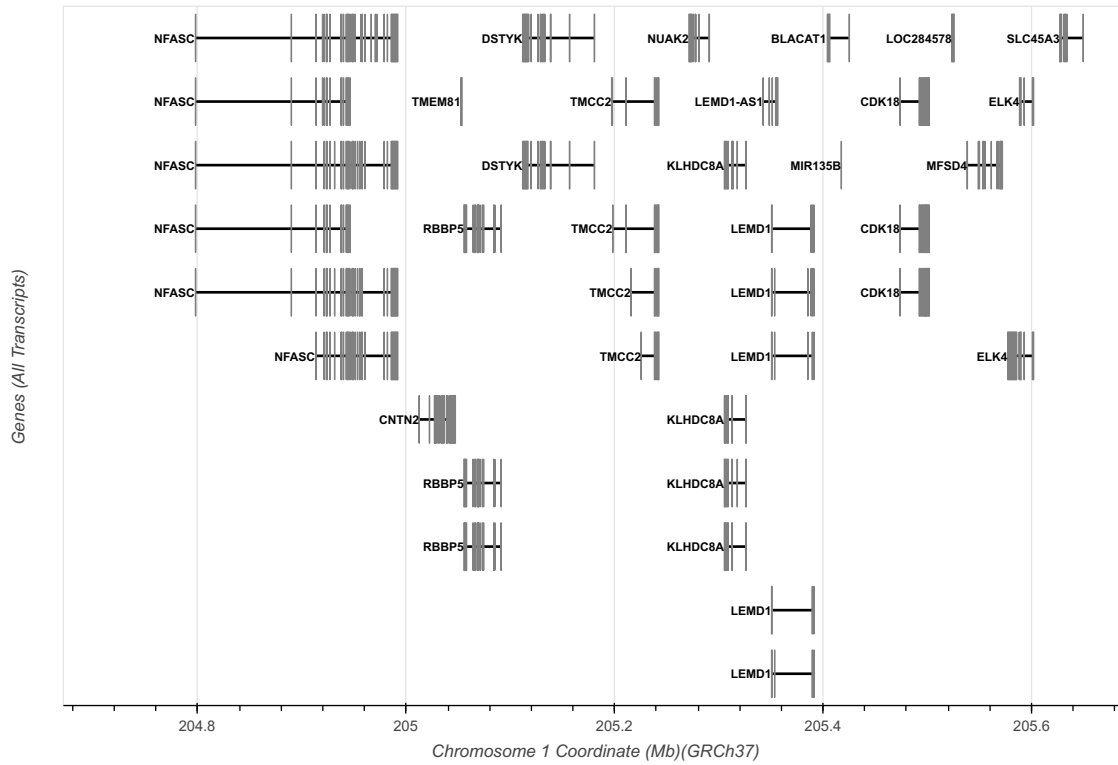

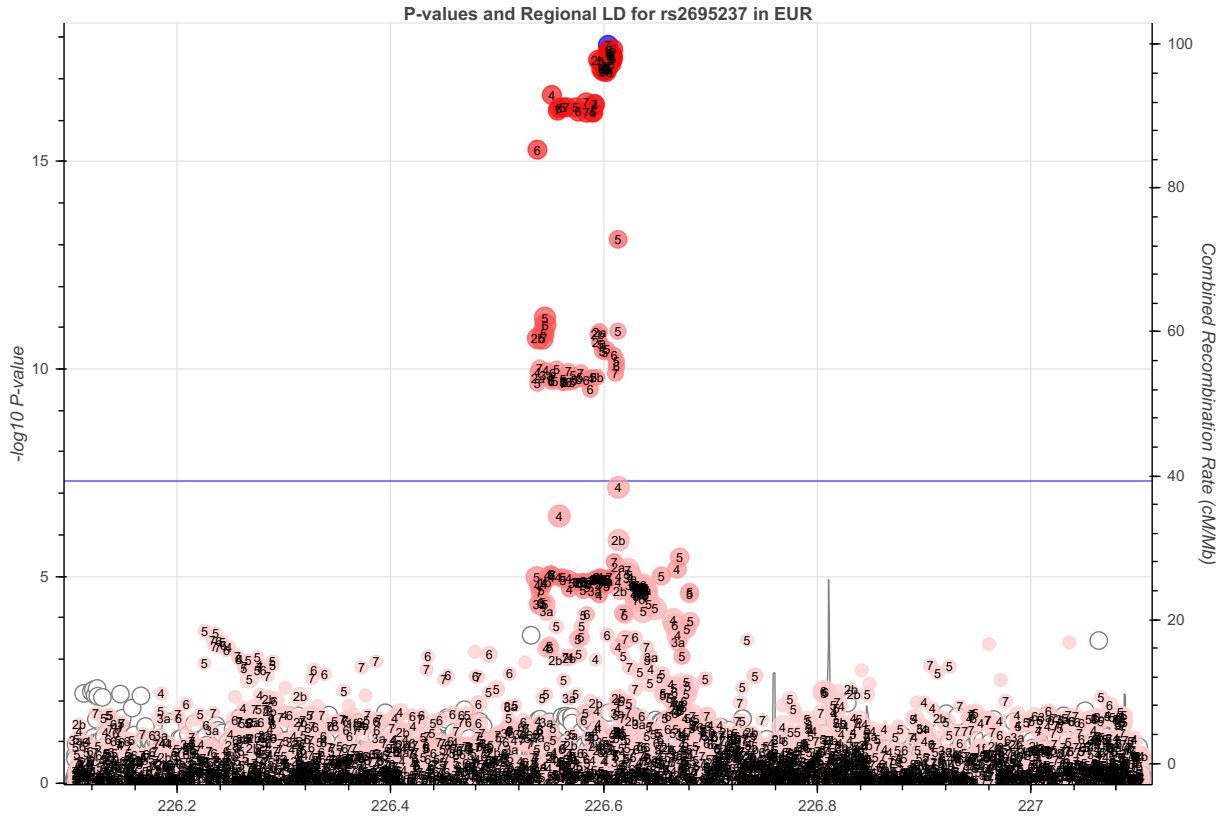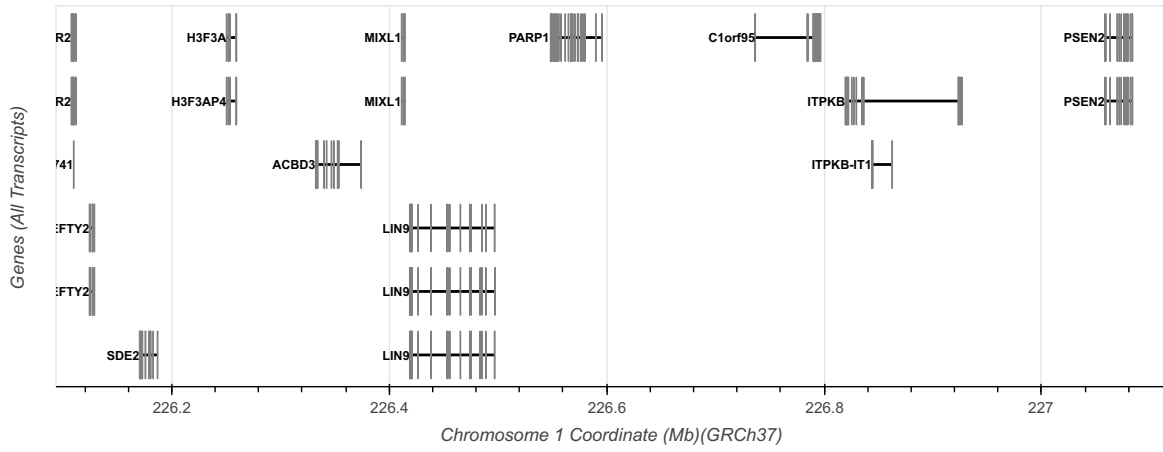

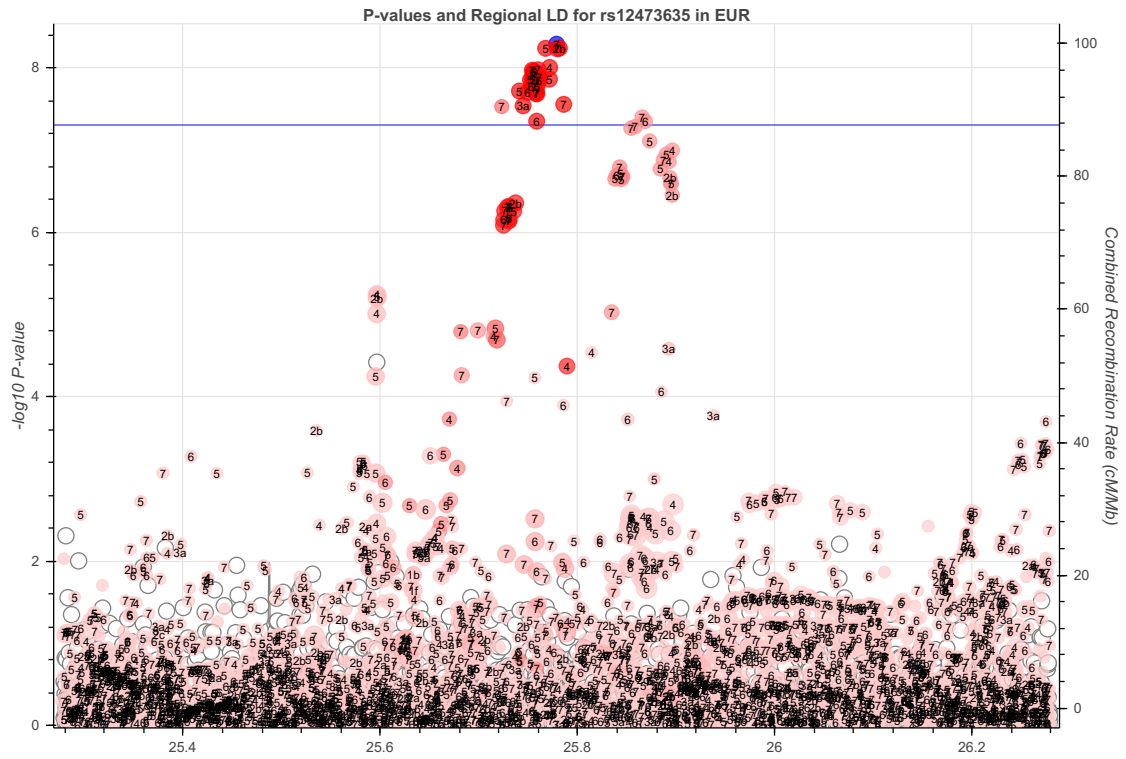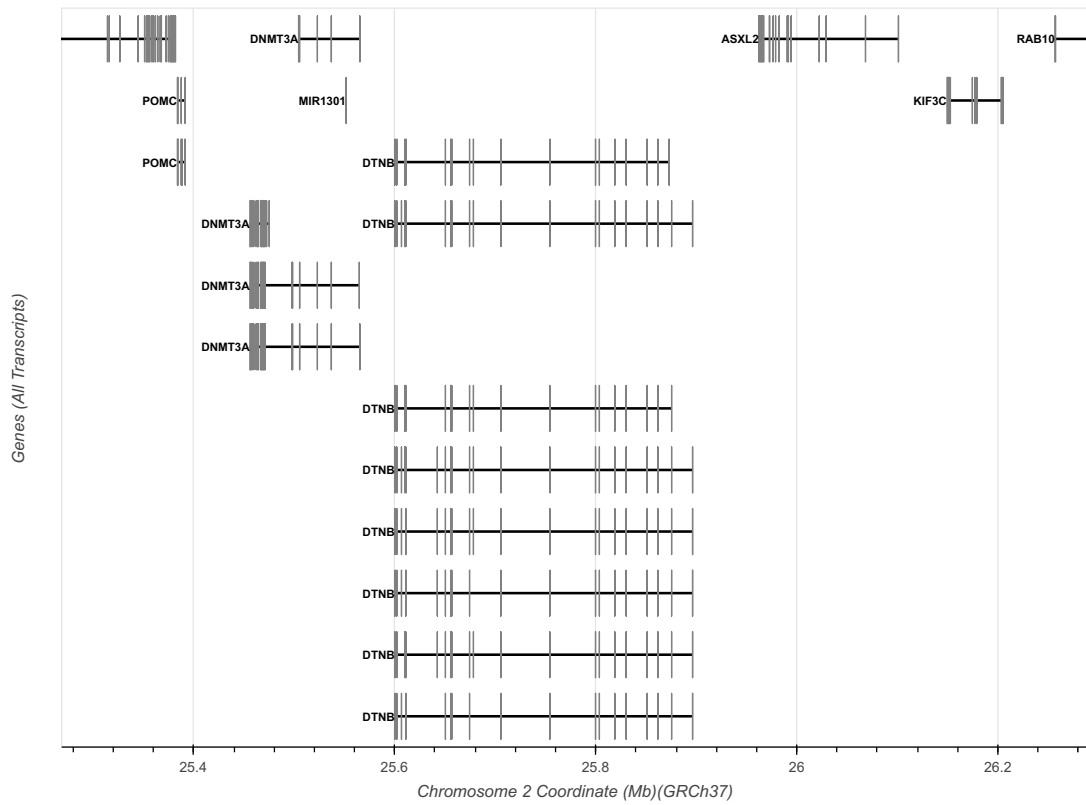

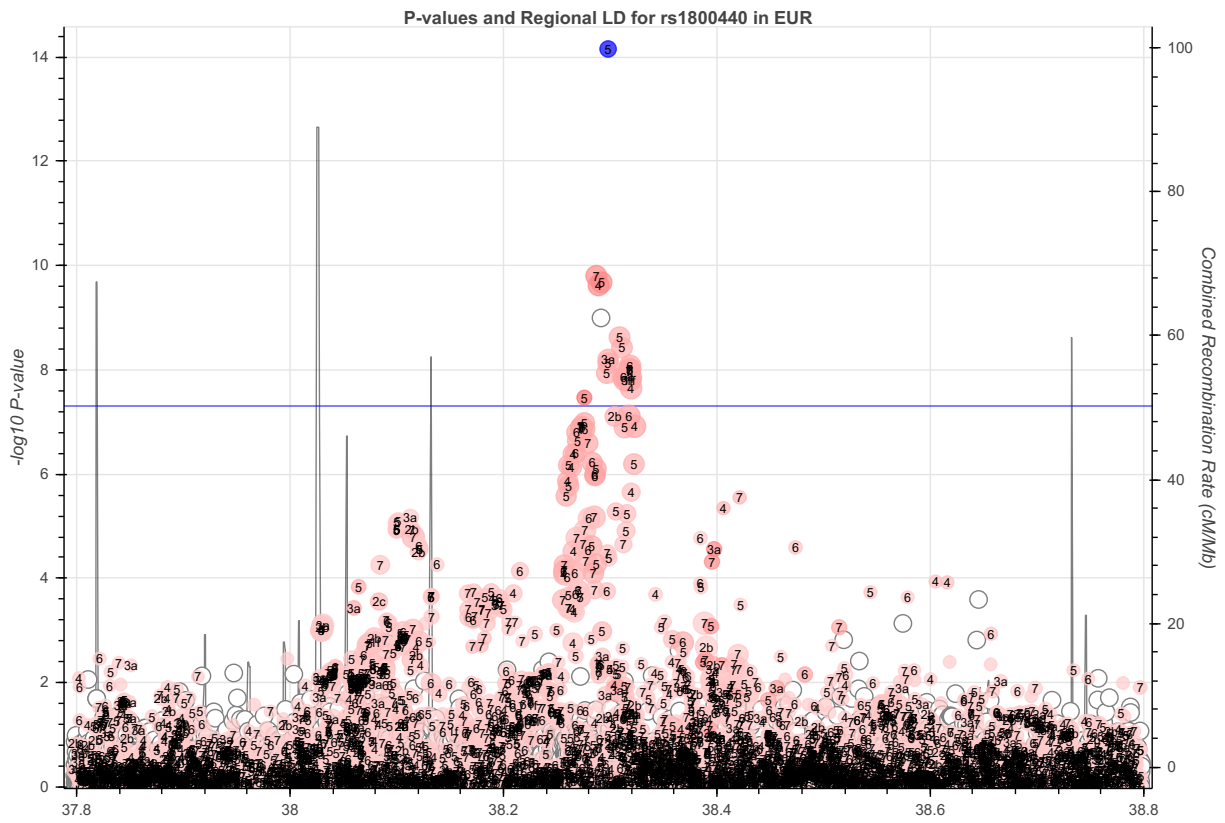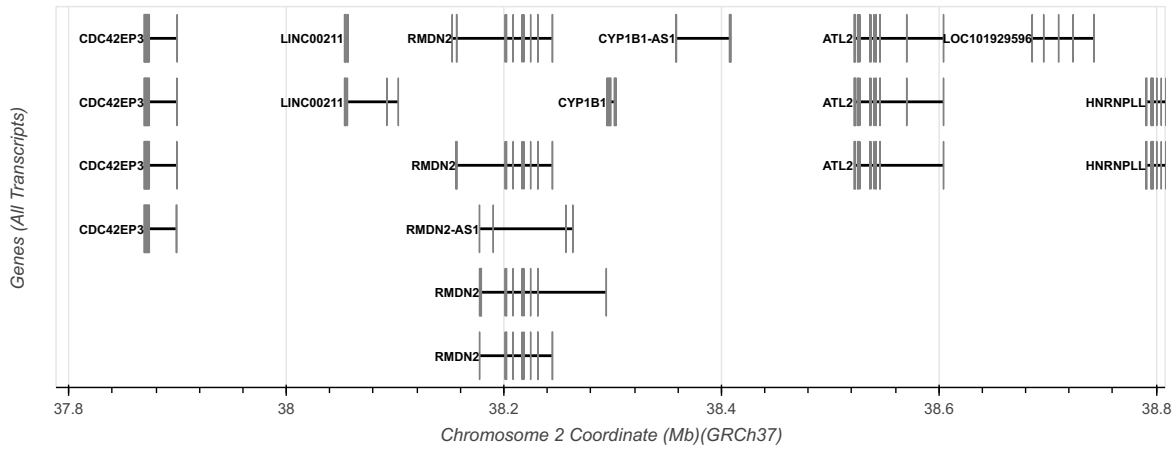



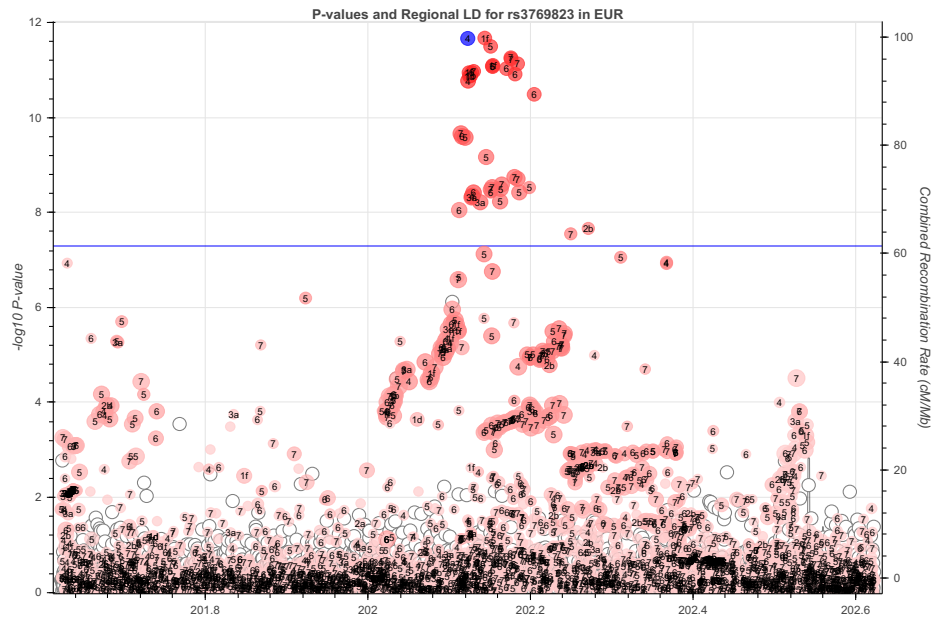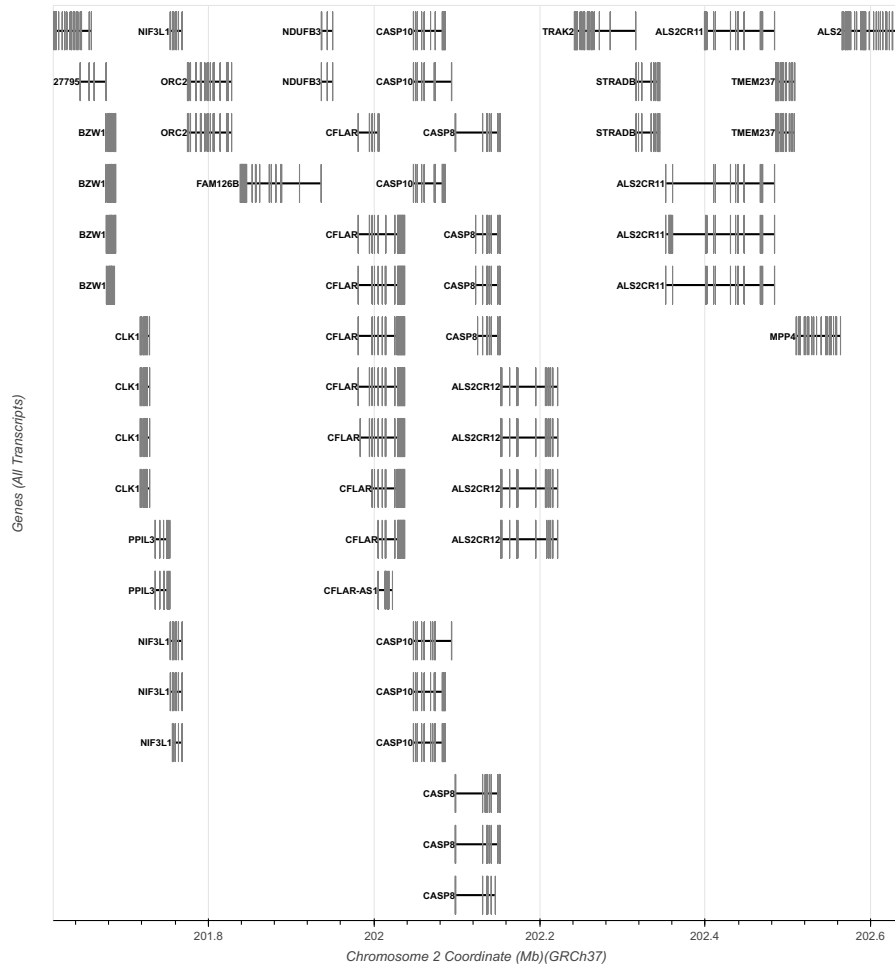

rs3769823 plotted in lieu of rs10931936 (the most significant SNP in the region) as multiple variants in the 1000 Genomes VCF file used by LDassoc map to the genomic coordinate for rs10931936 (chr2:202143928, GRCh37).

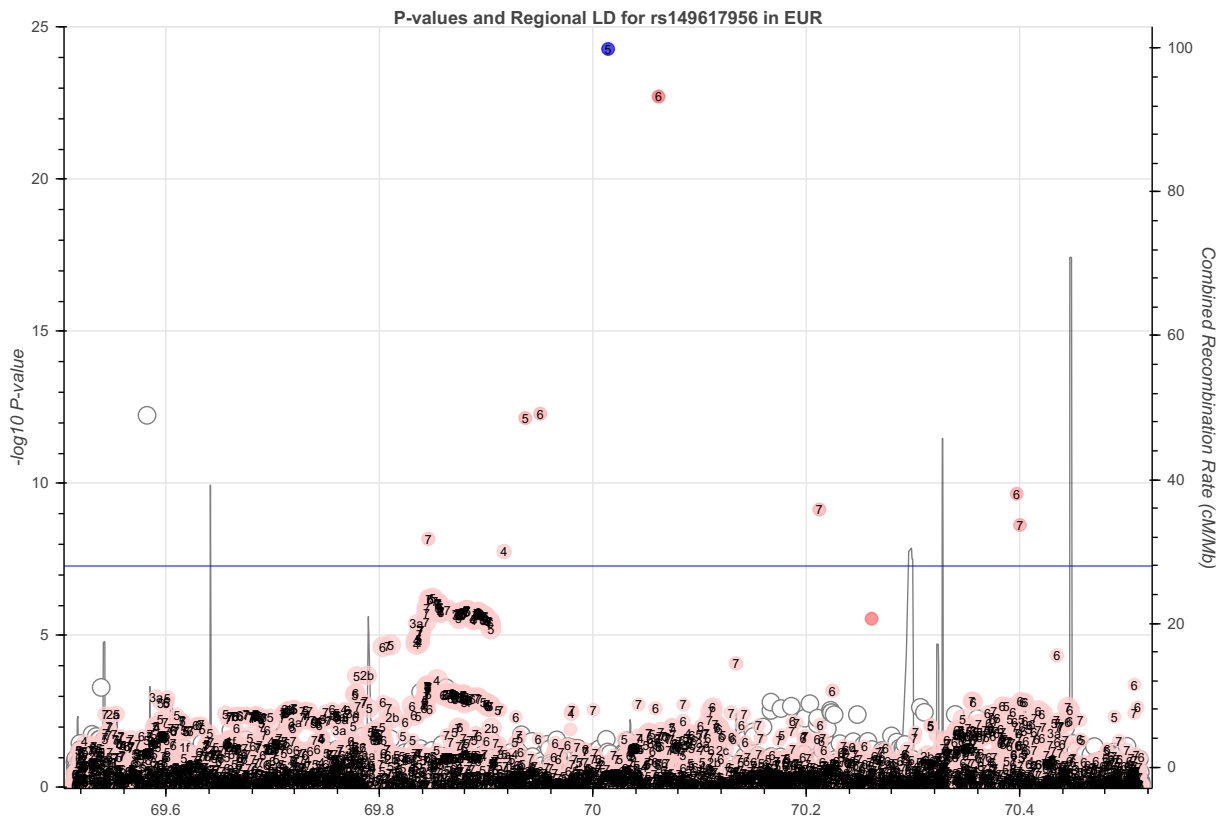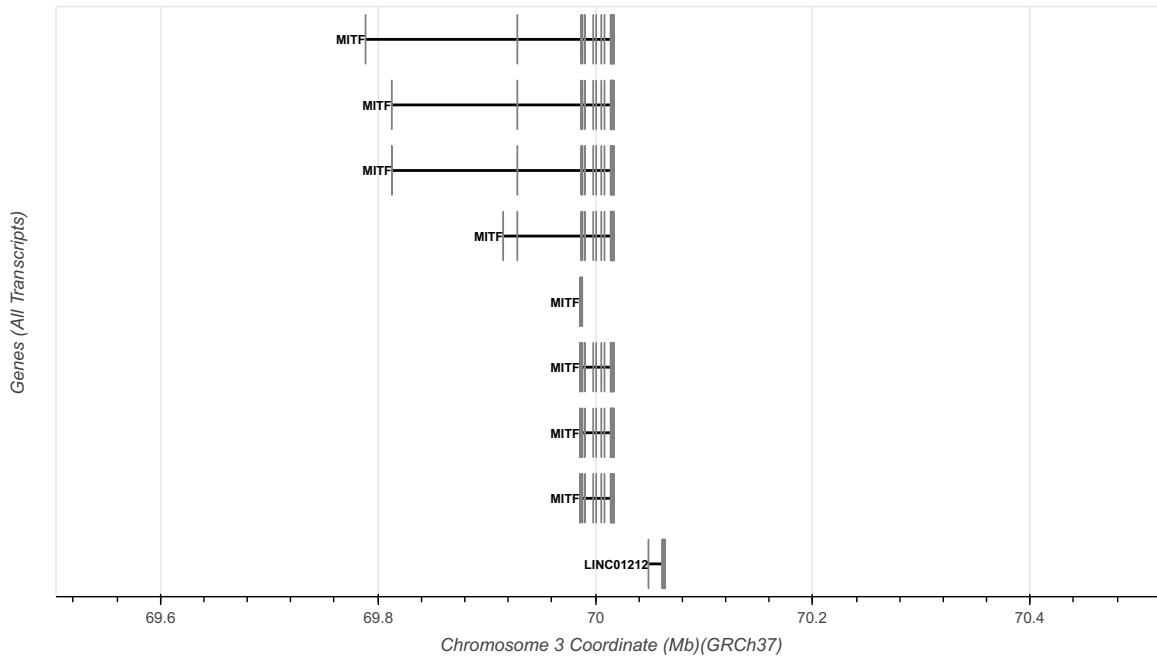



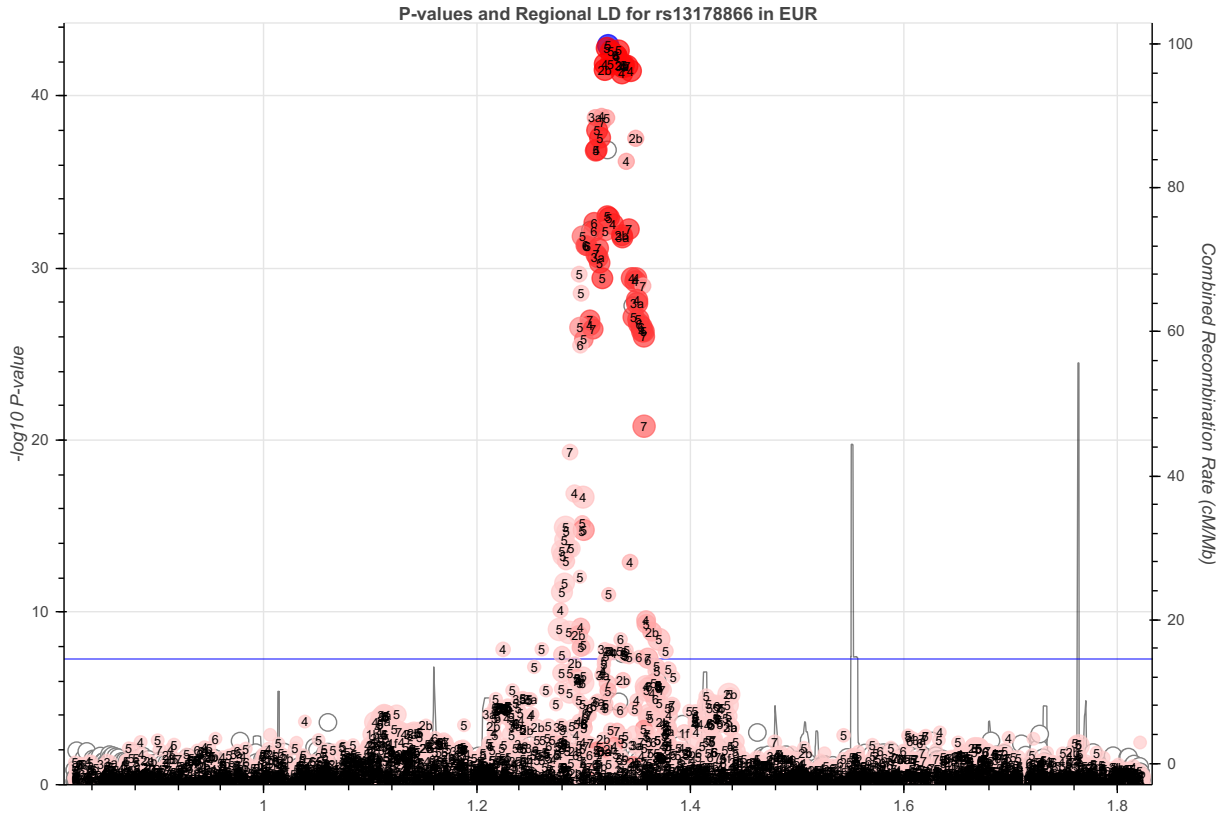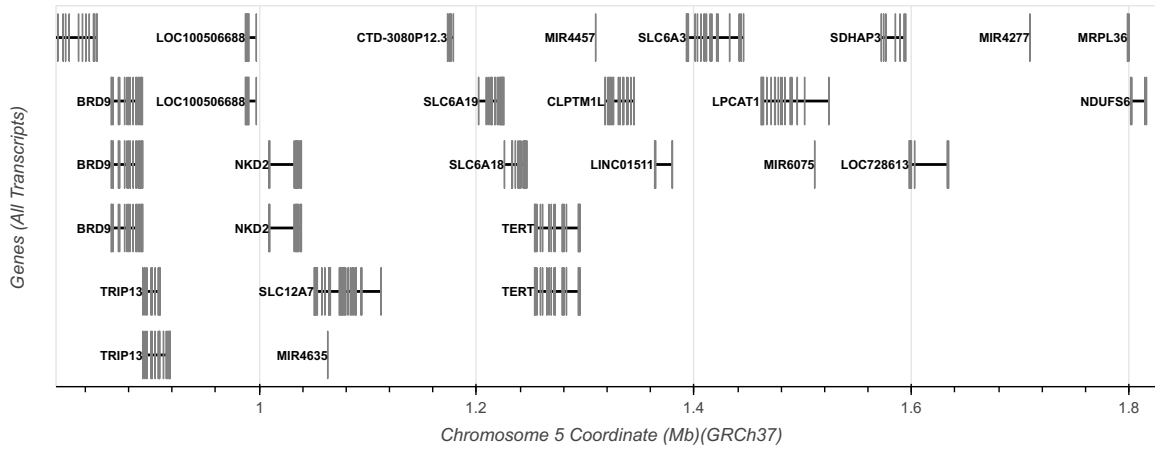

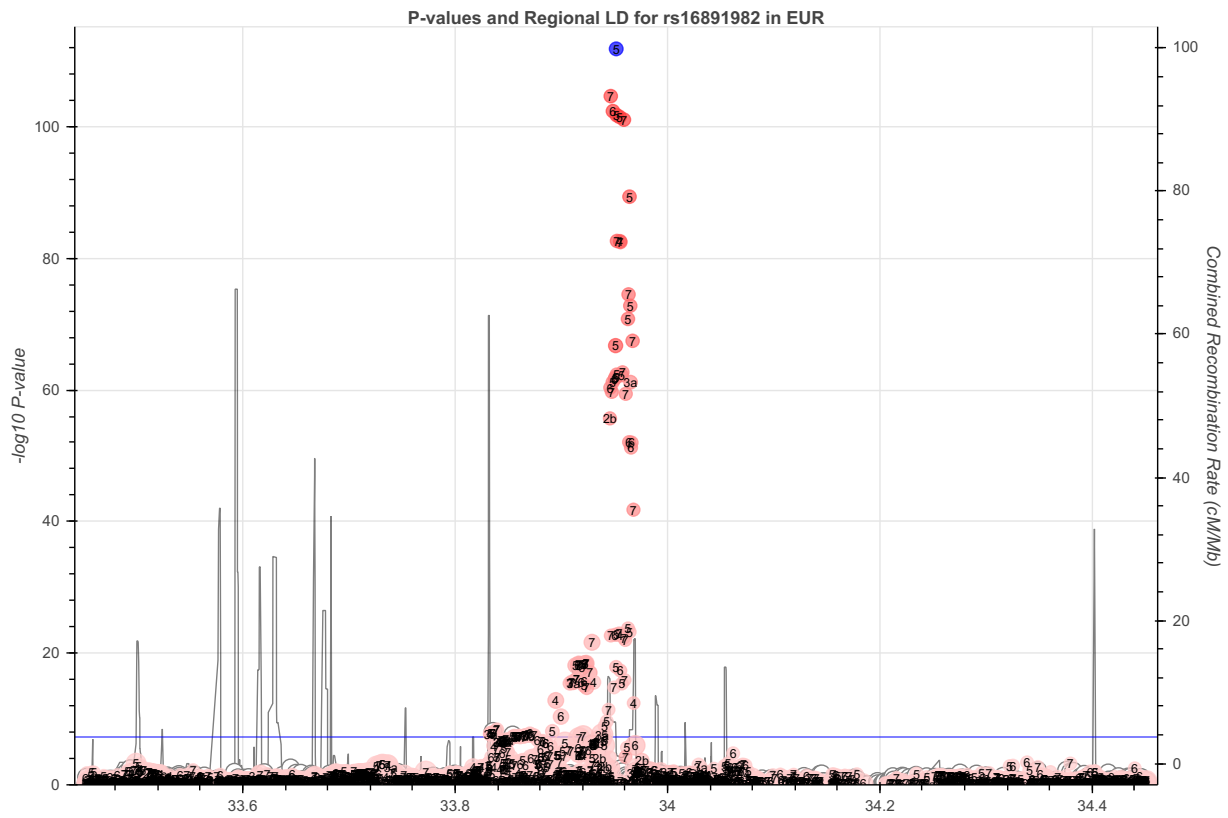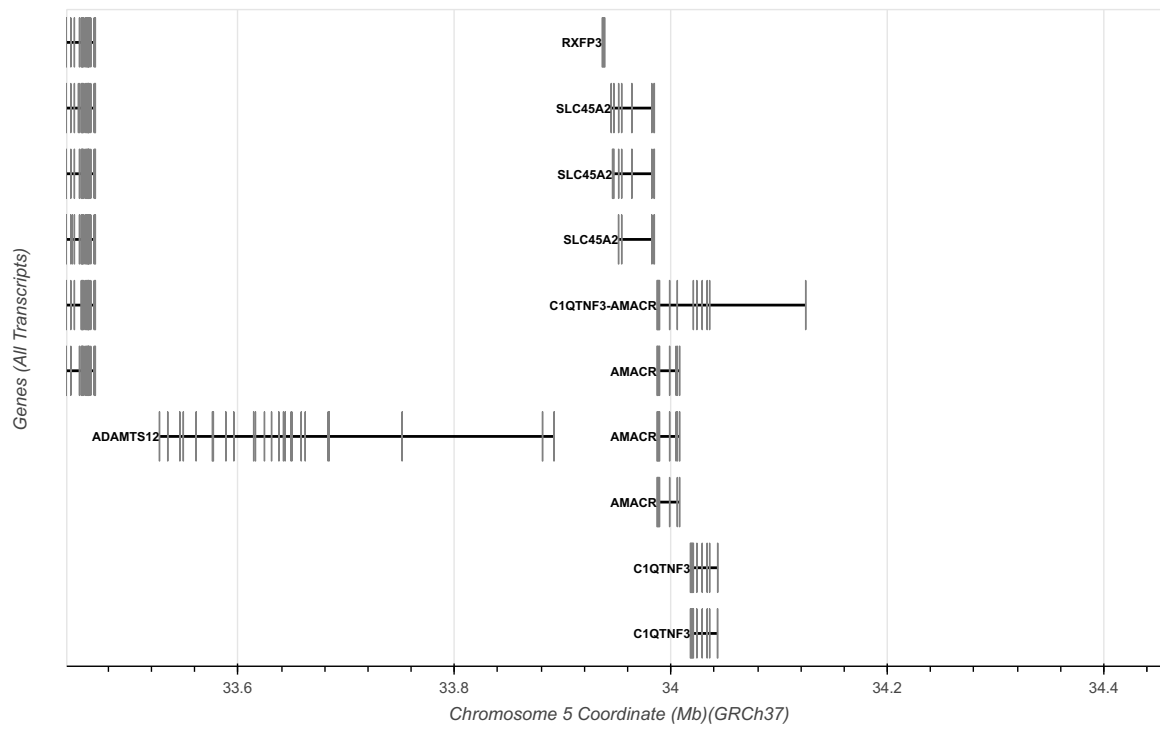

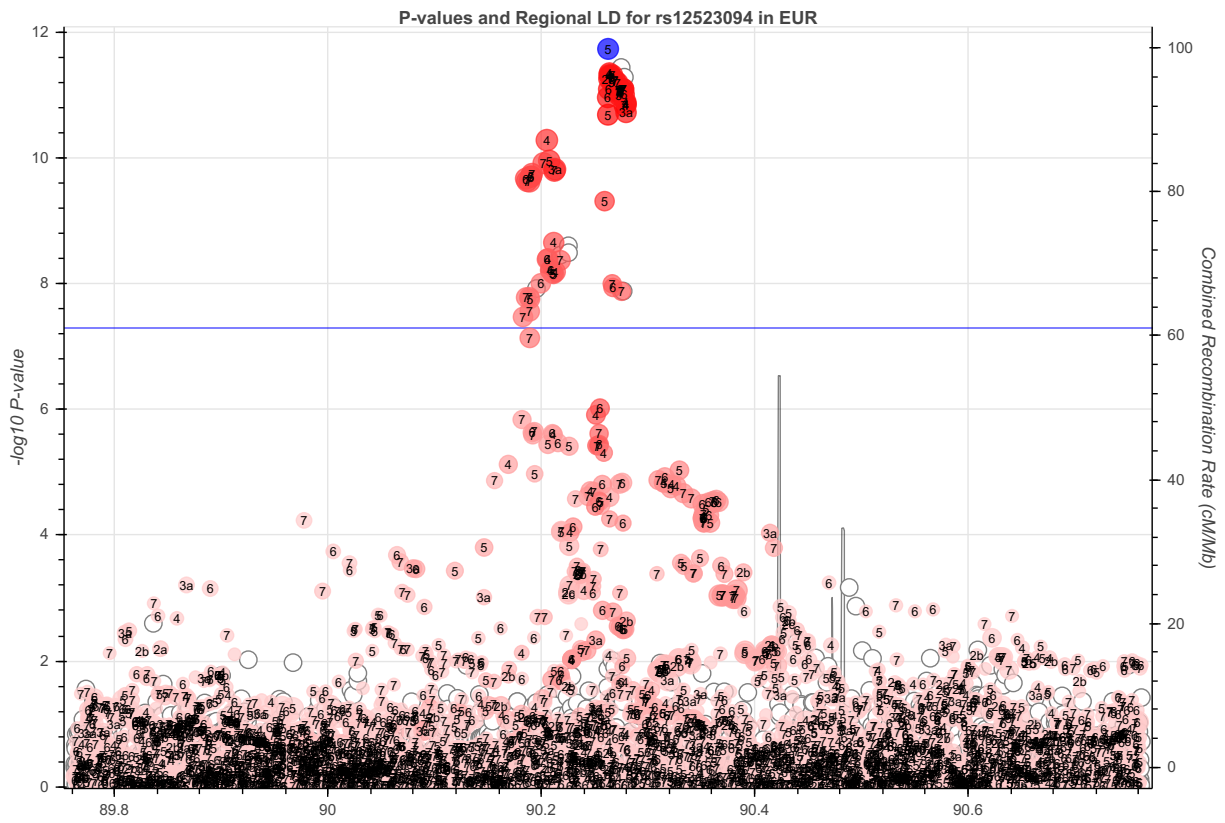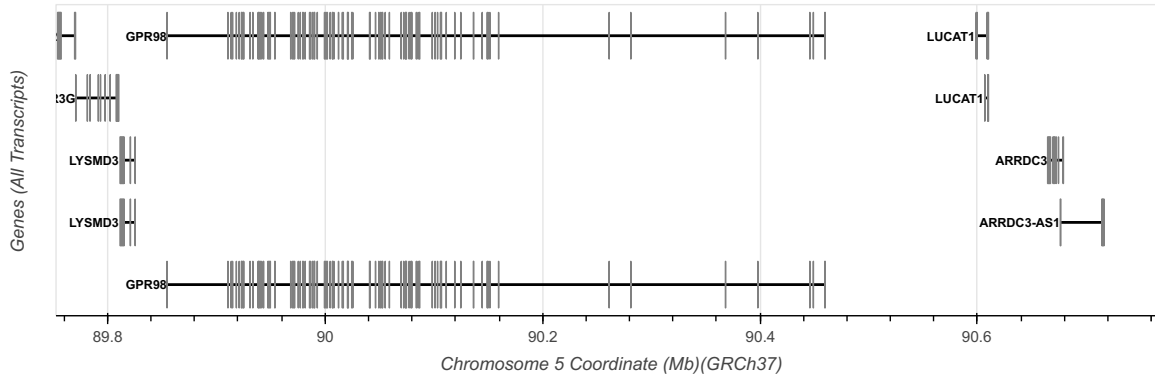



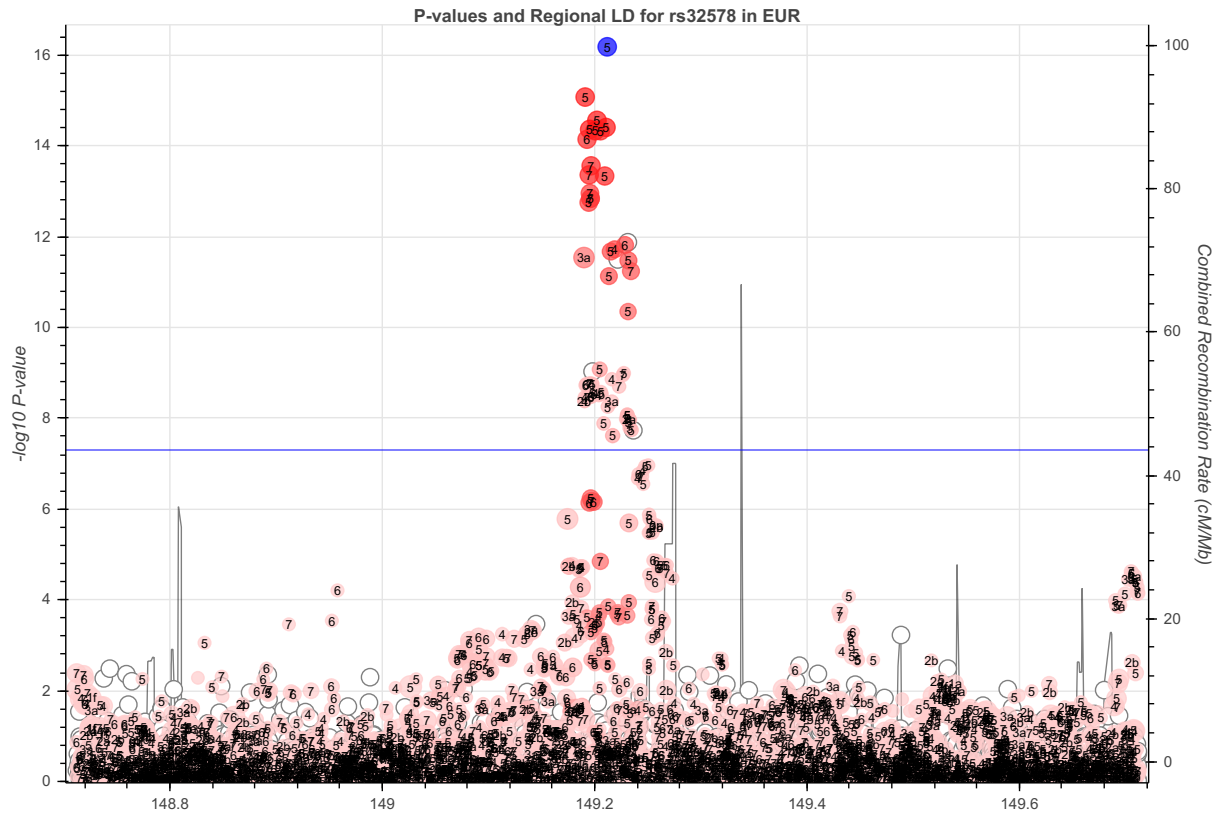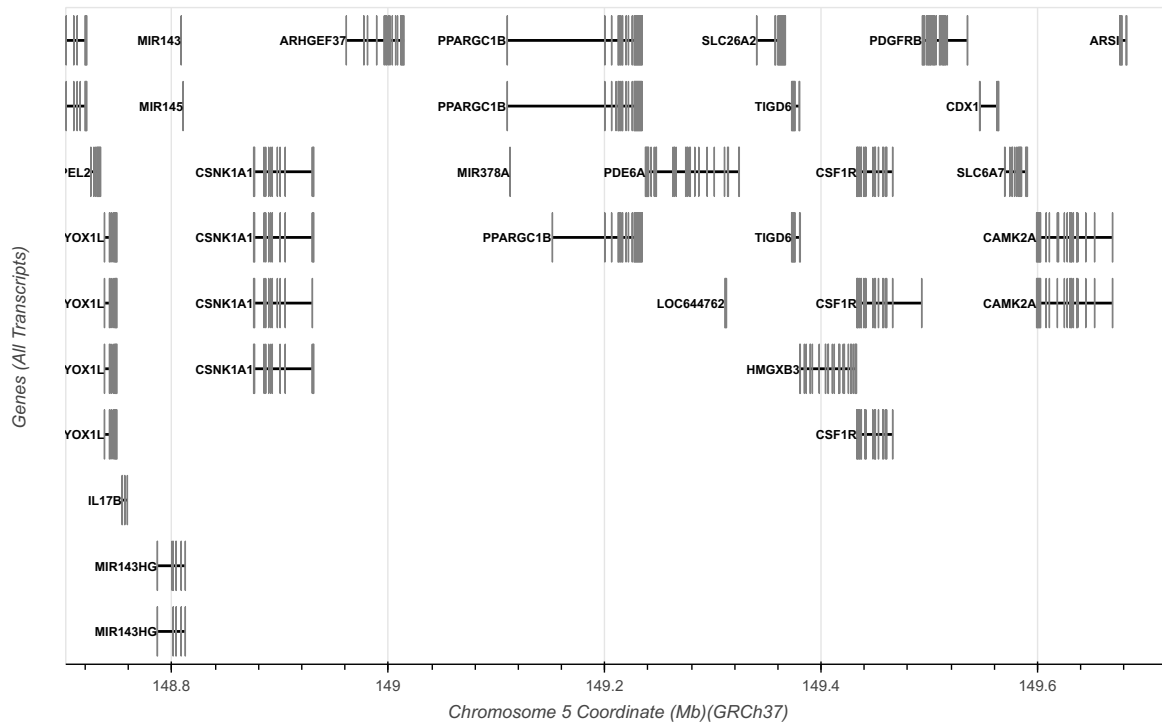

P-values and Regional LD for rs12215602 in EUR

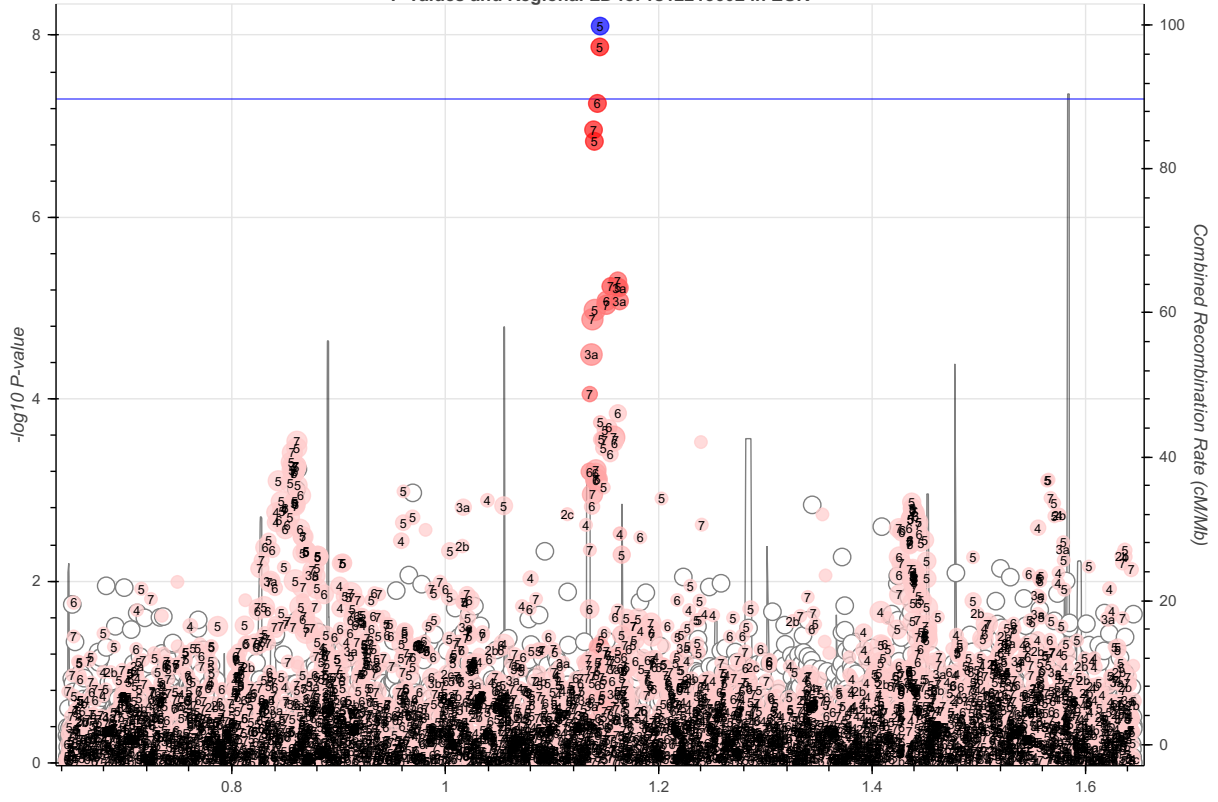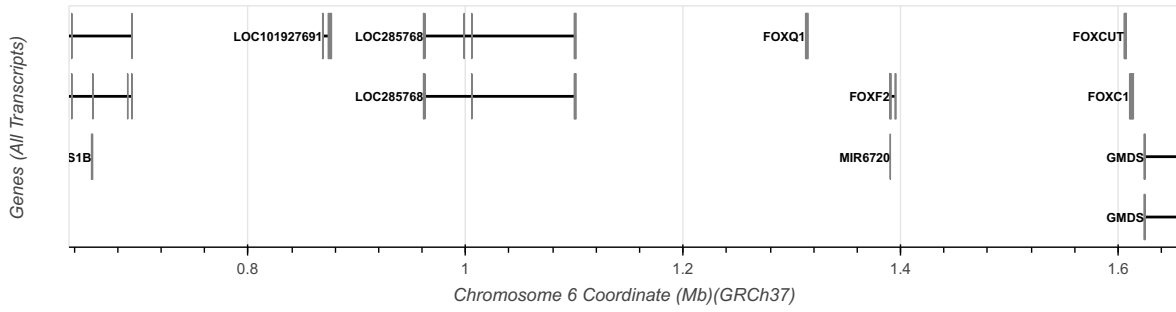

P-values and Regional LD for rs6914598 in EUR

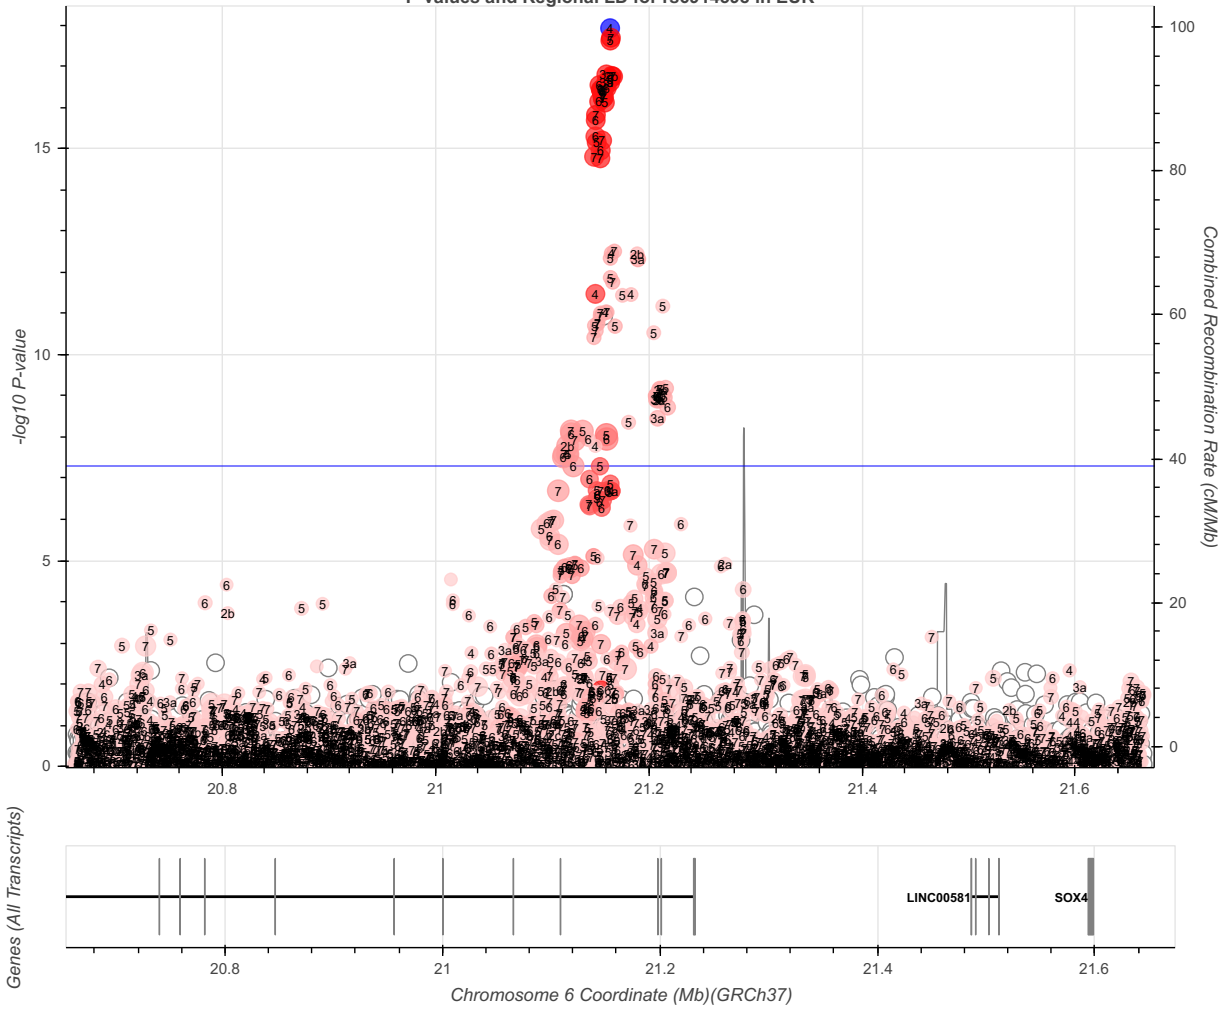

P-values and Regional LD for rs72834823 in EUR

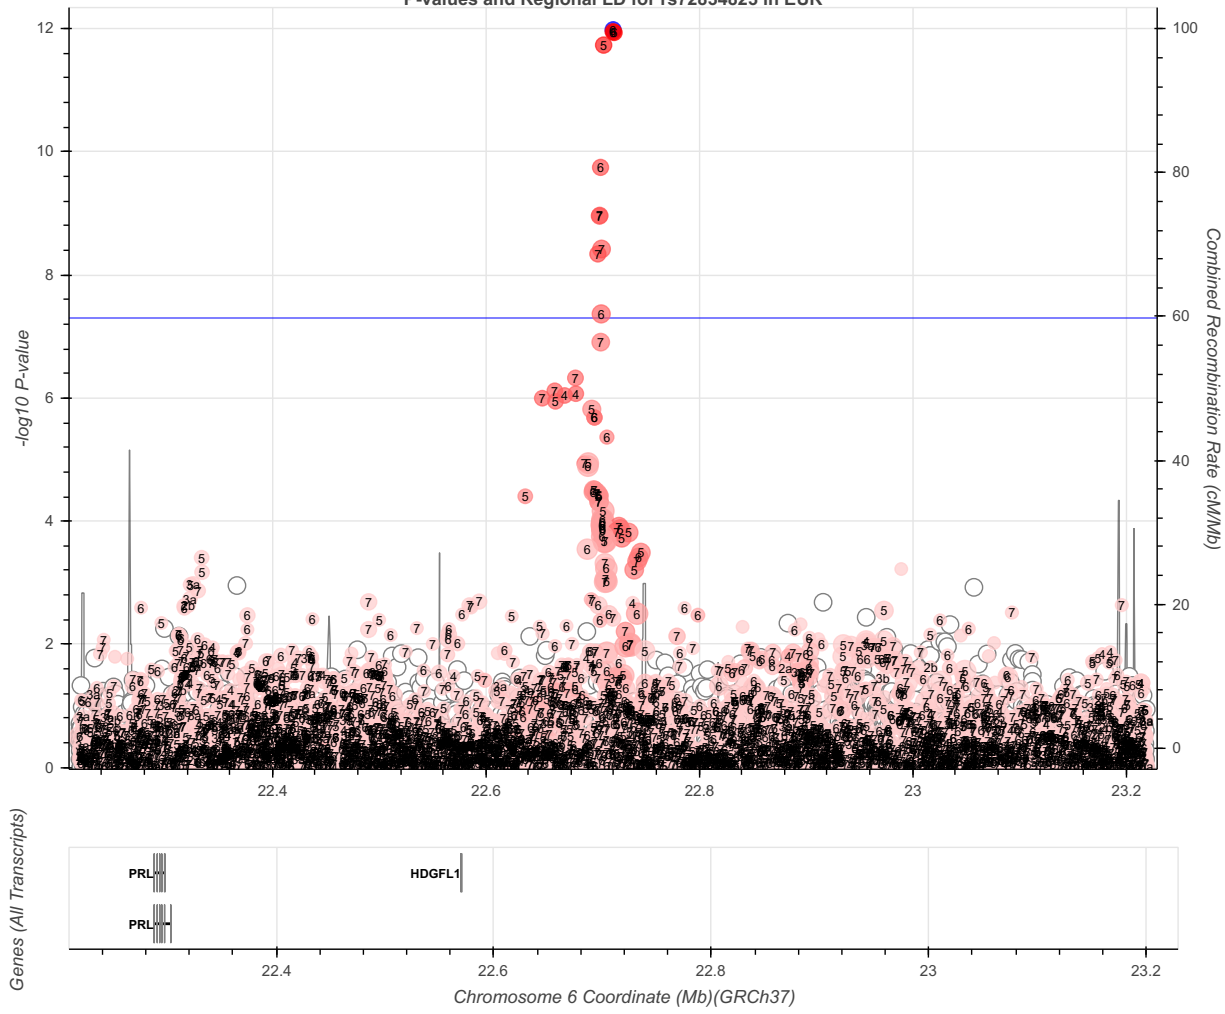

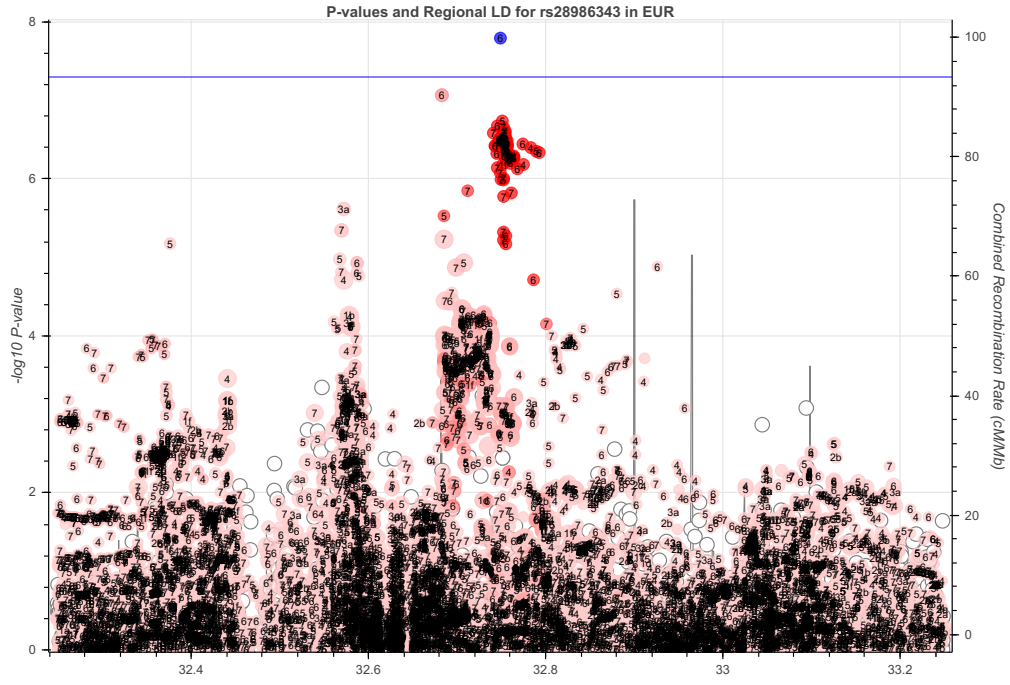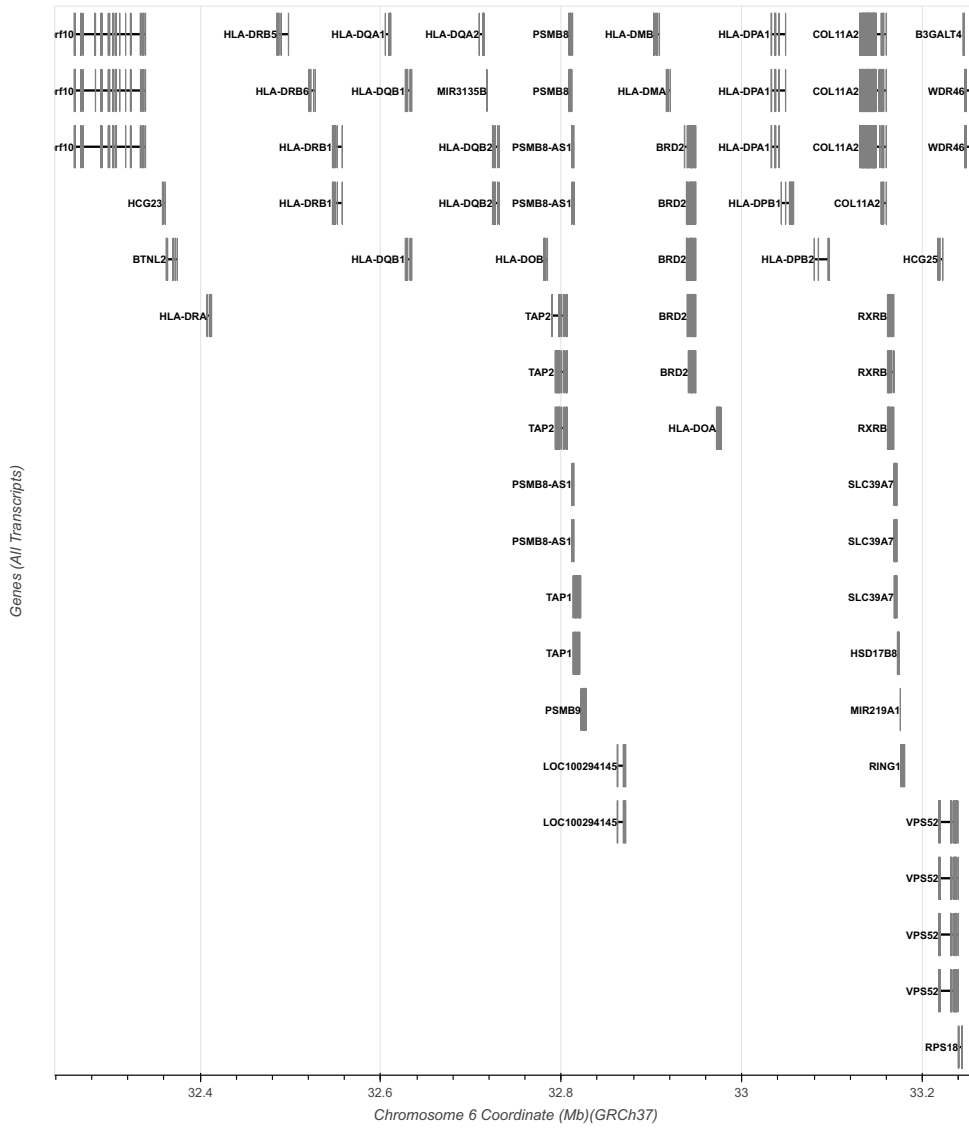

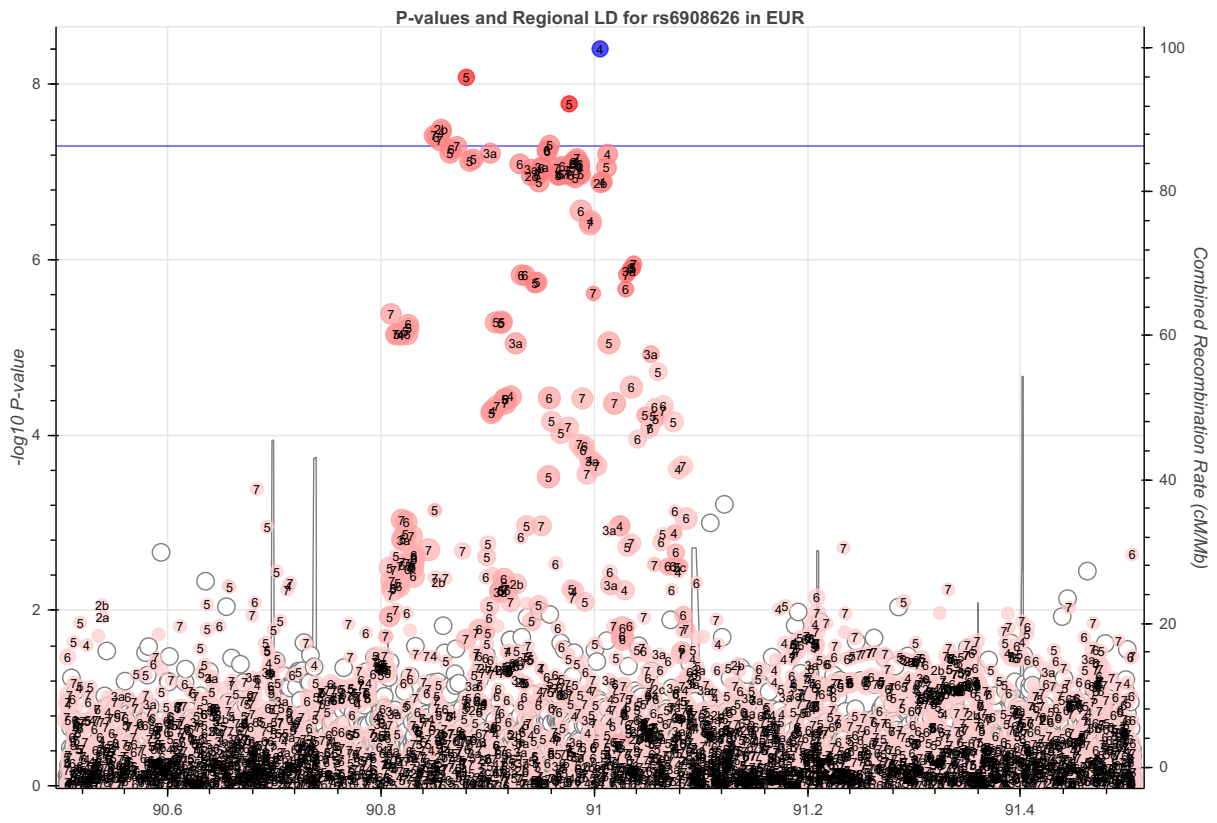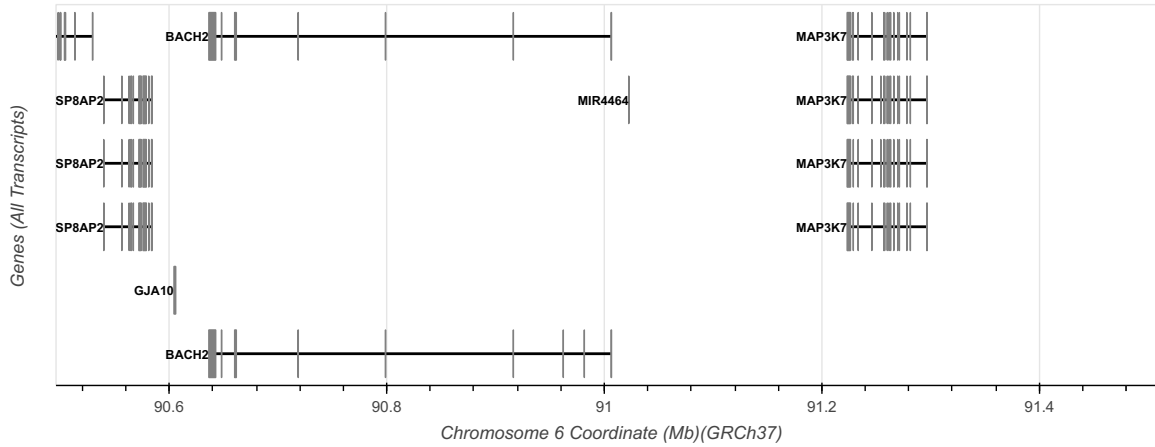



P-values and Regional LD for rs117132860 in EUR

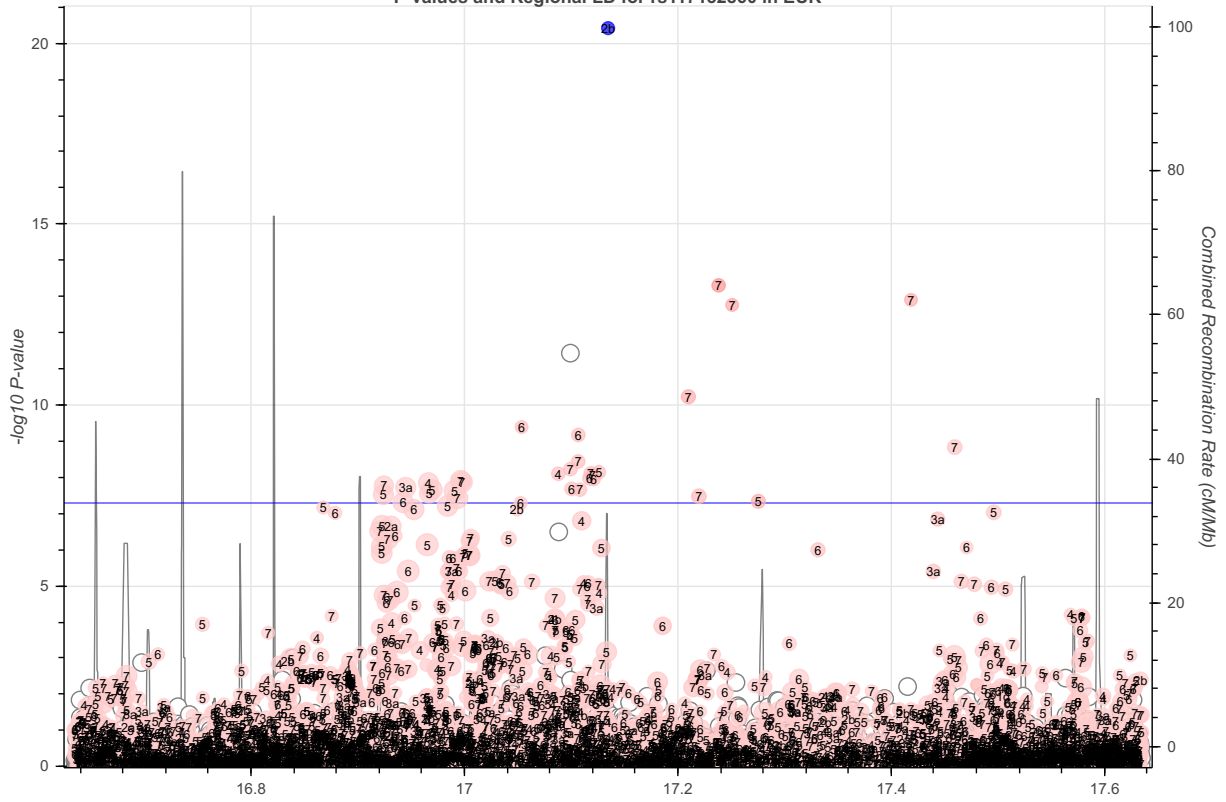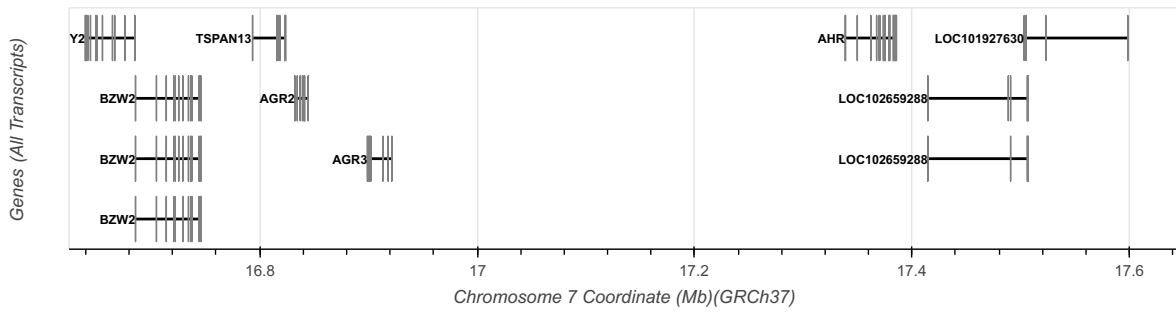

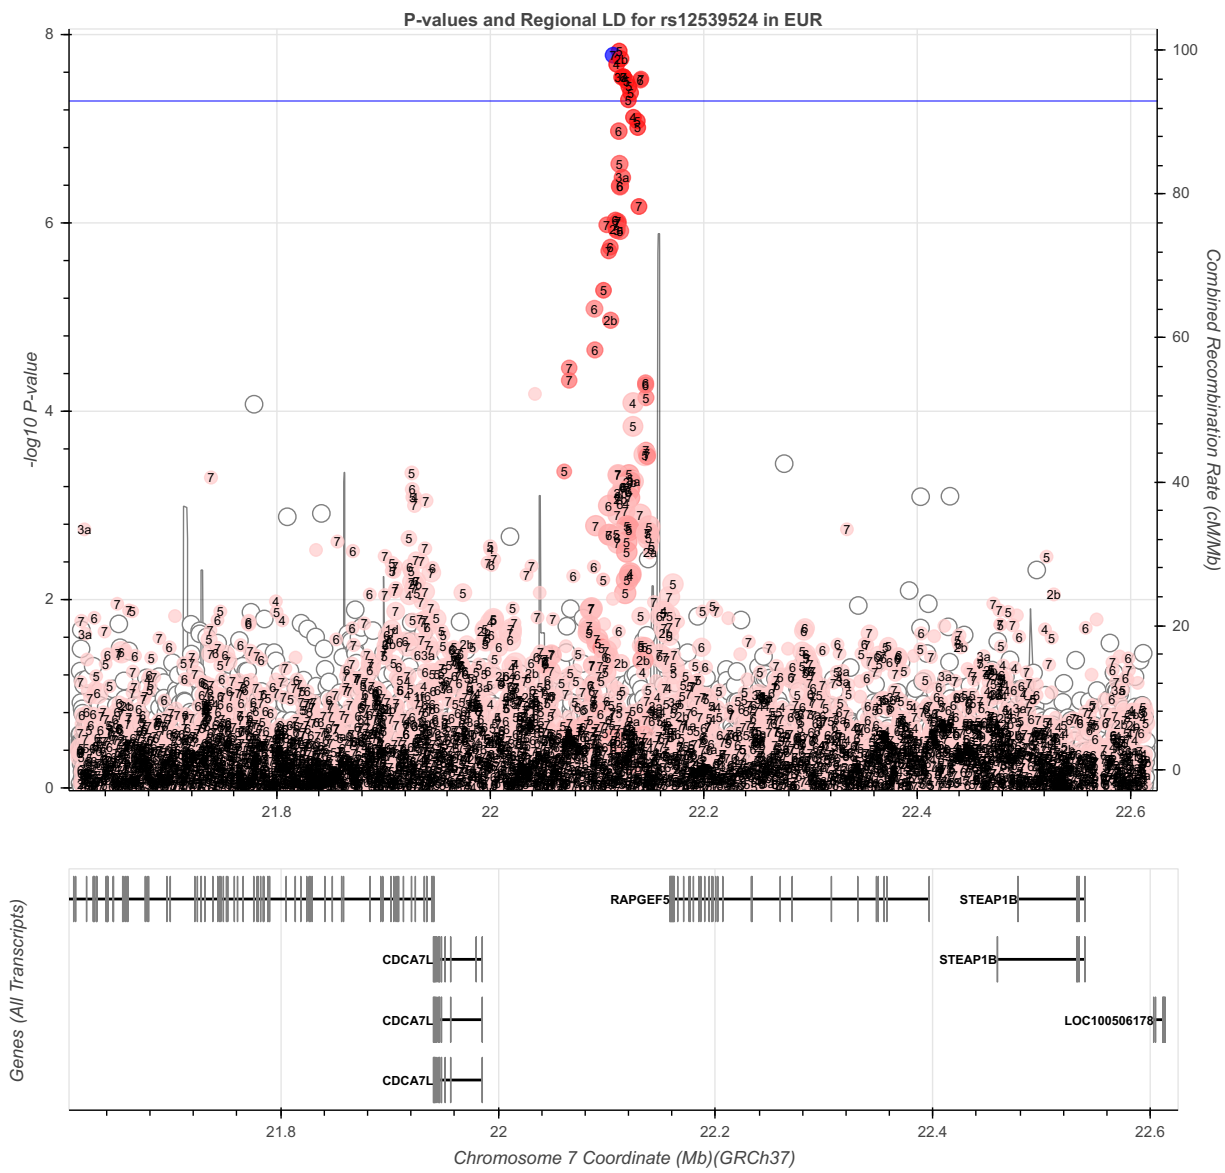

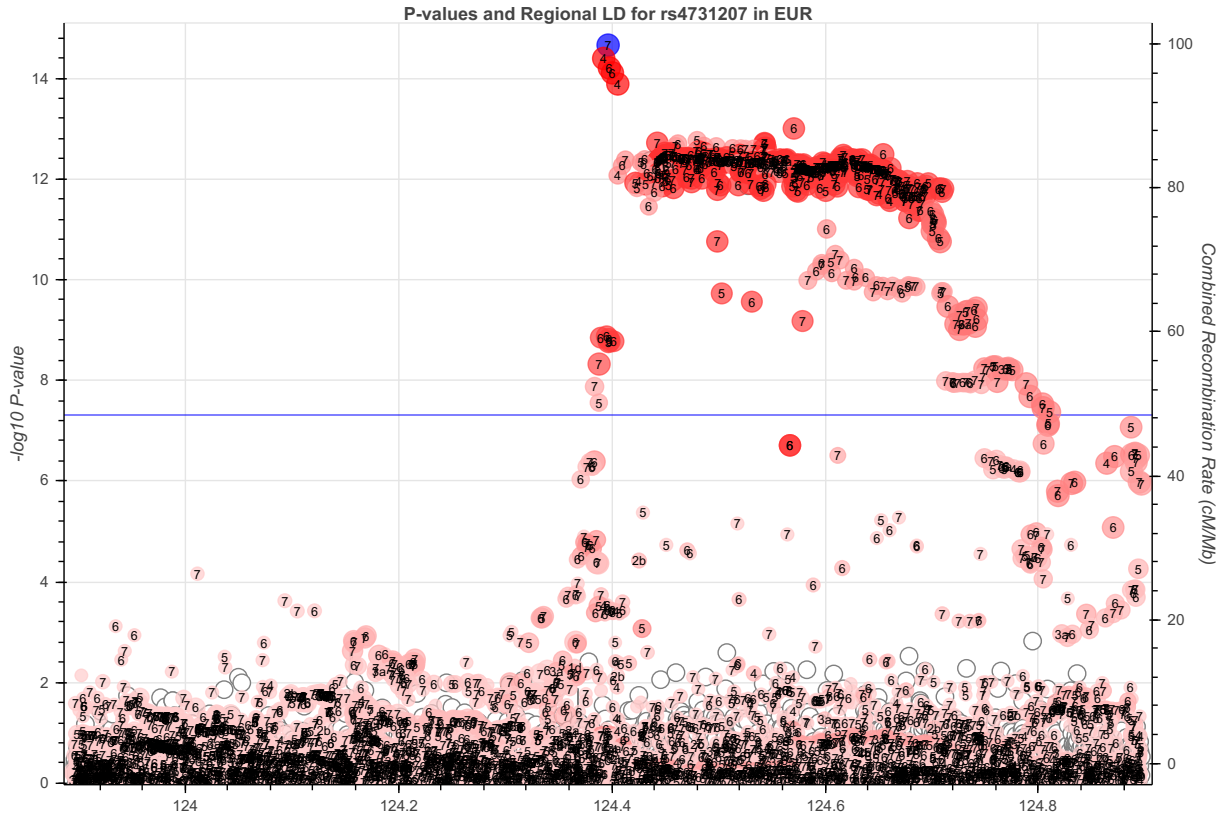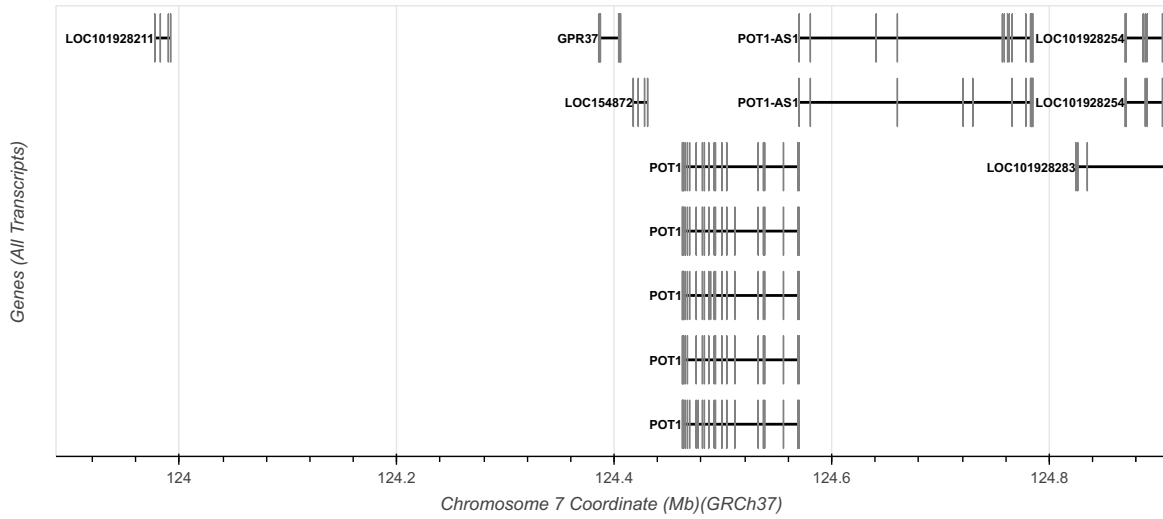

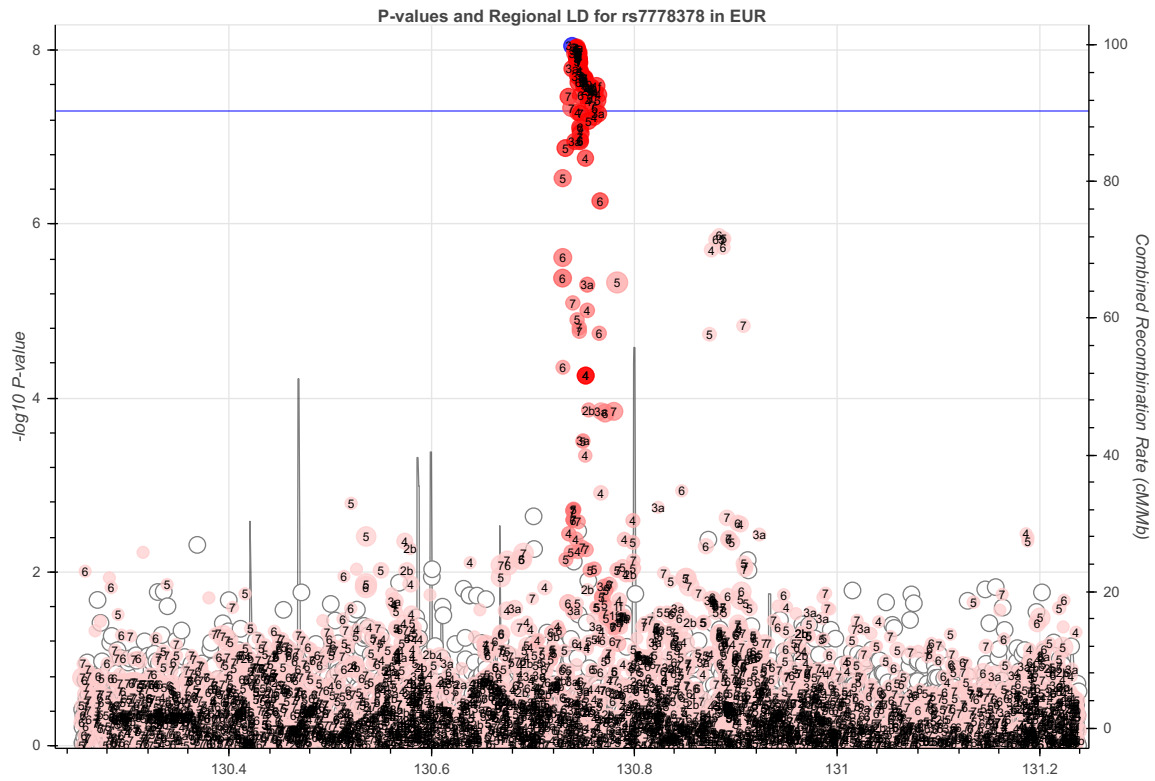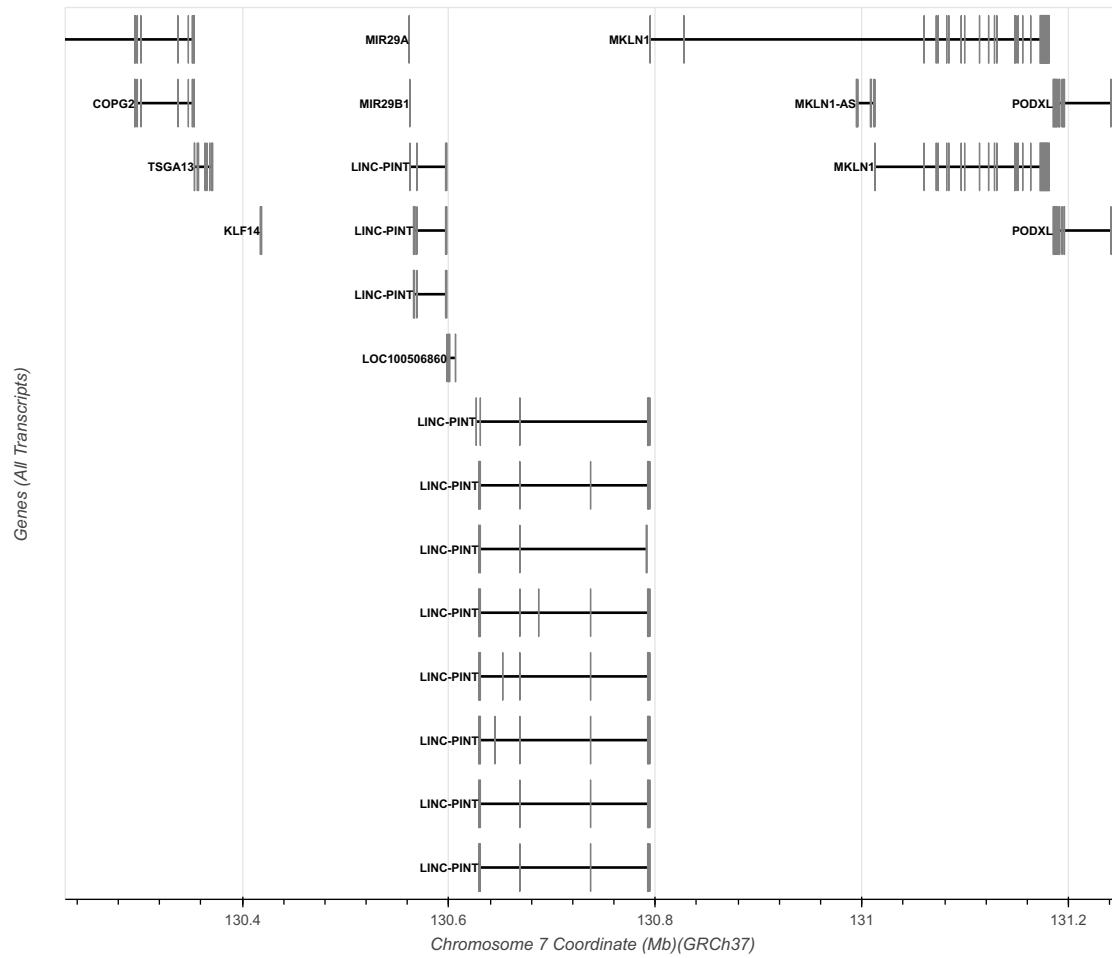

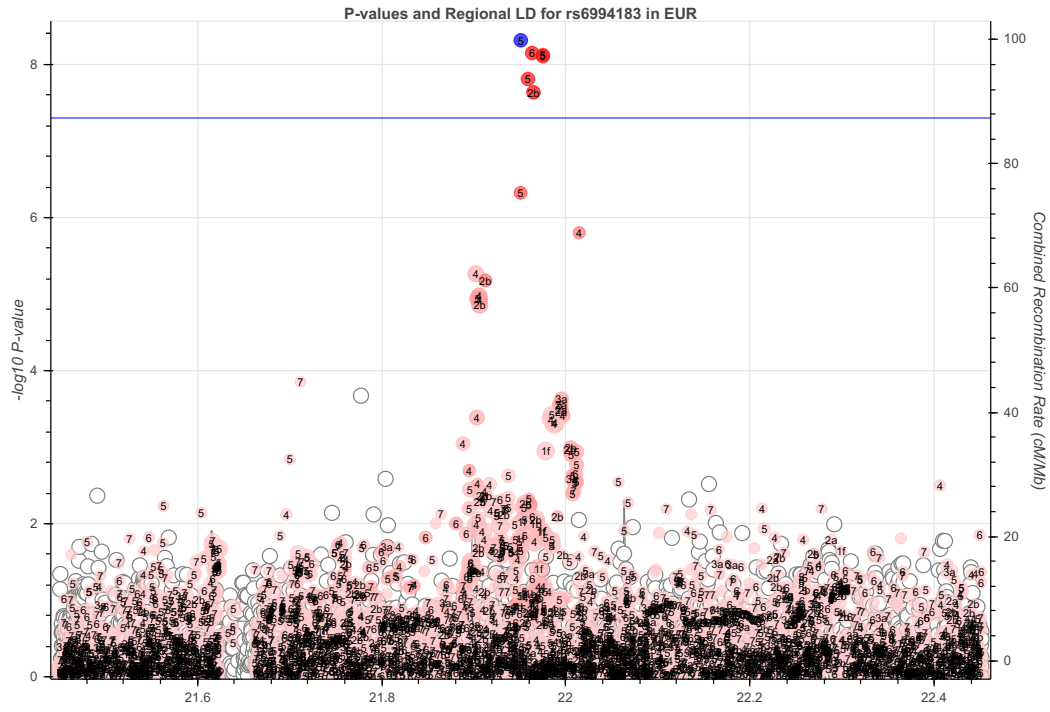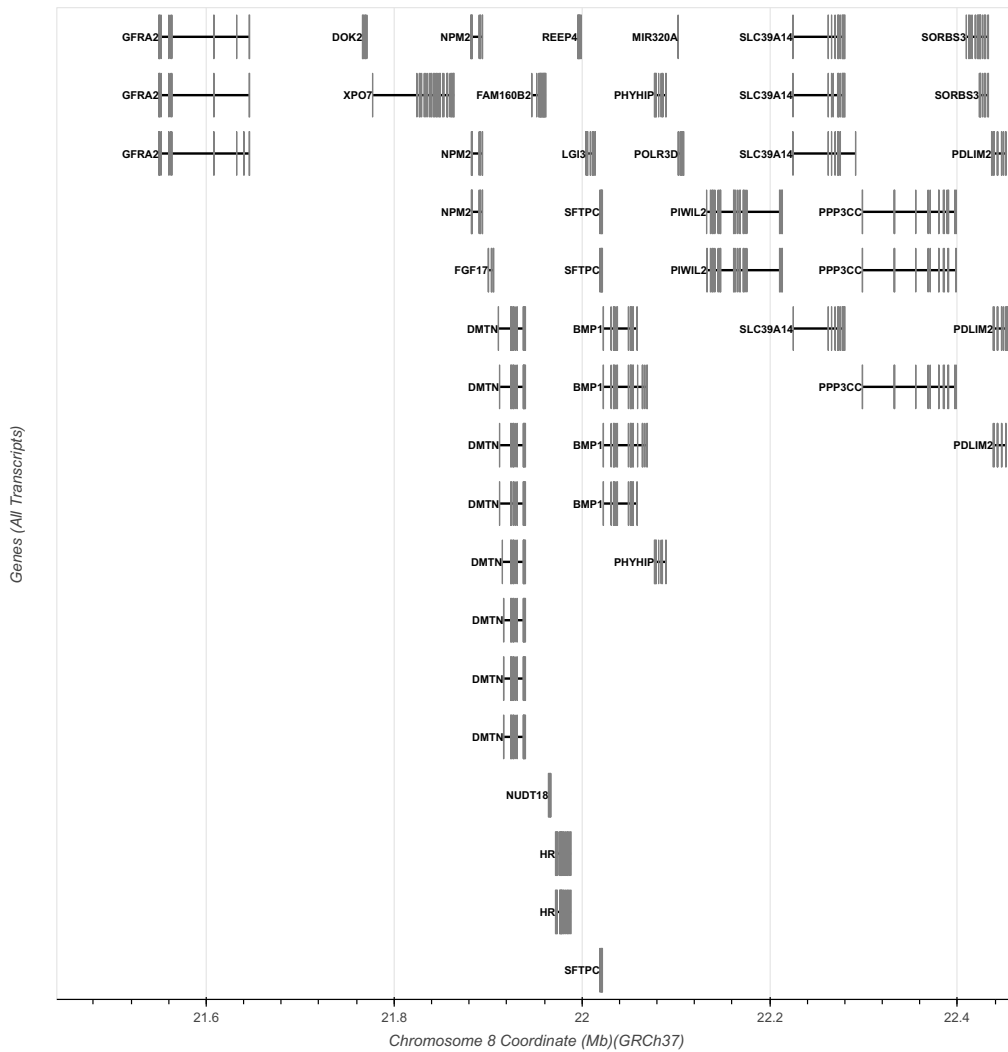

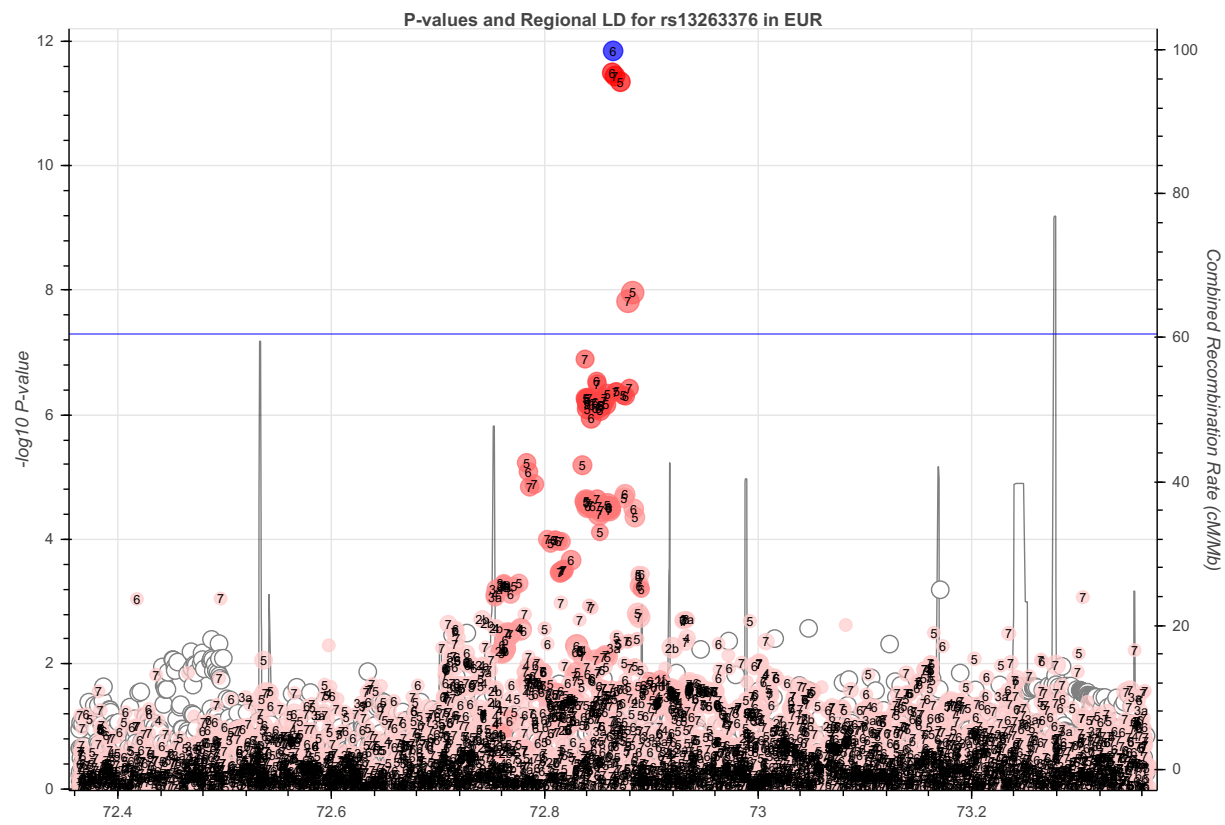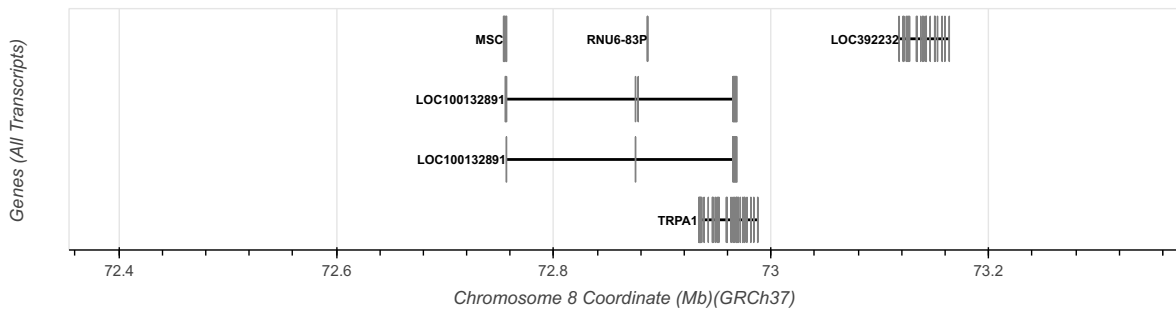



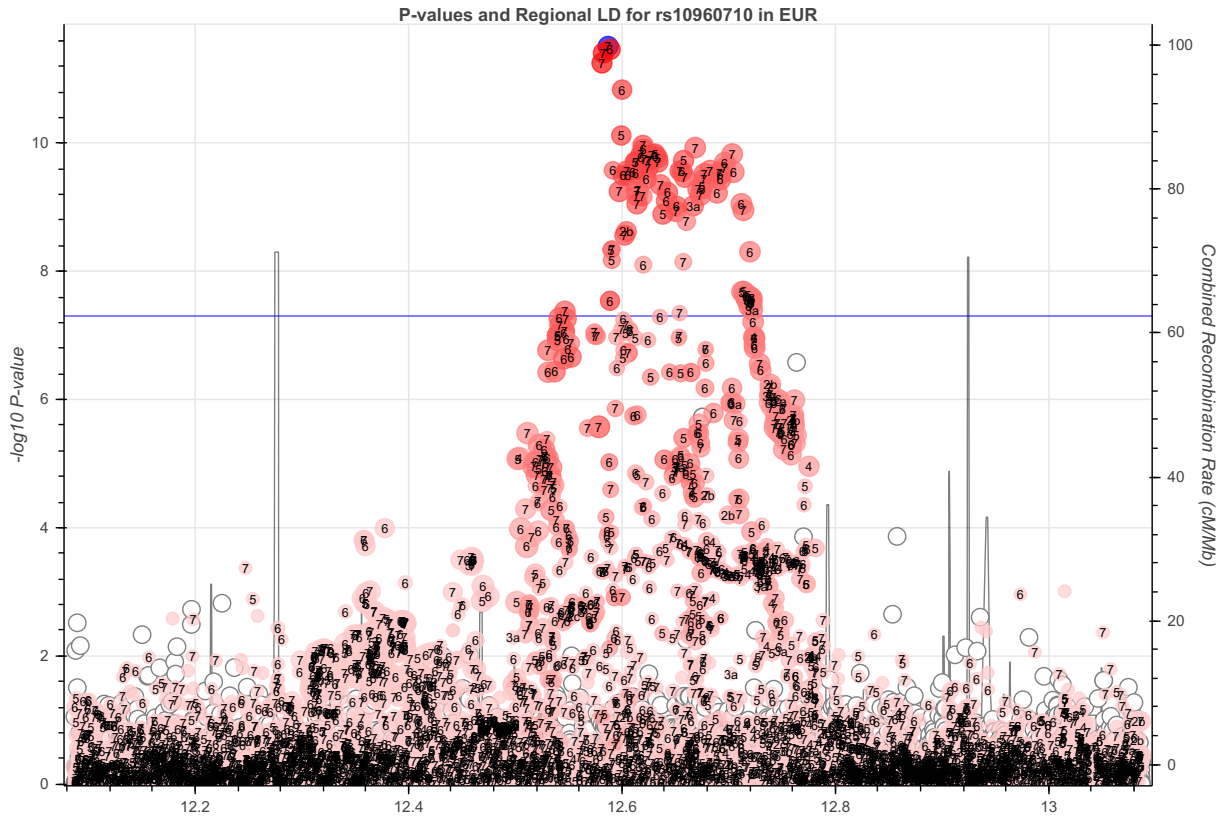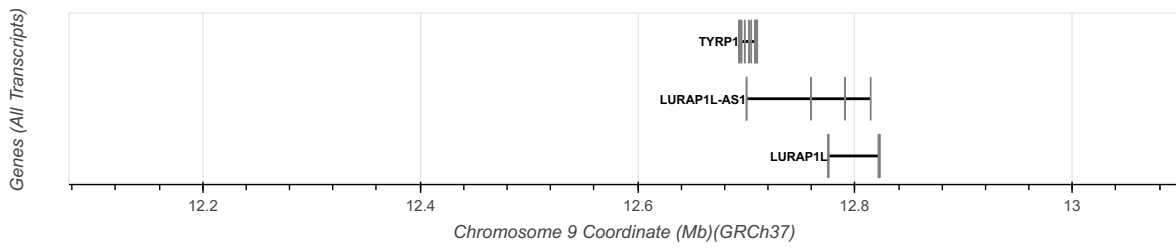

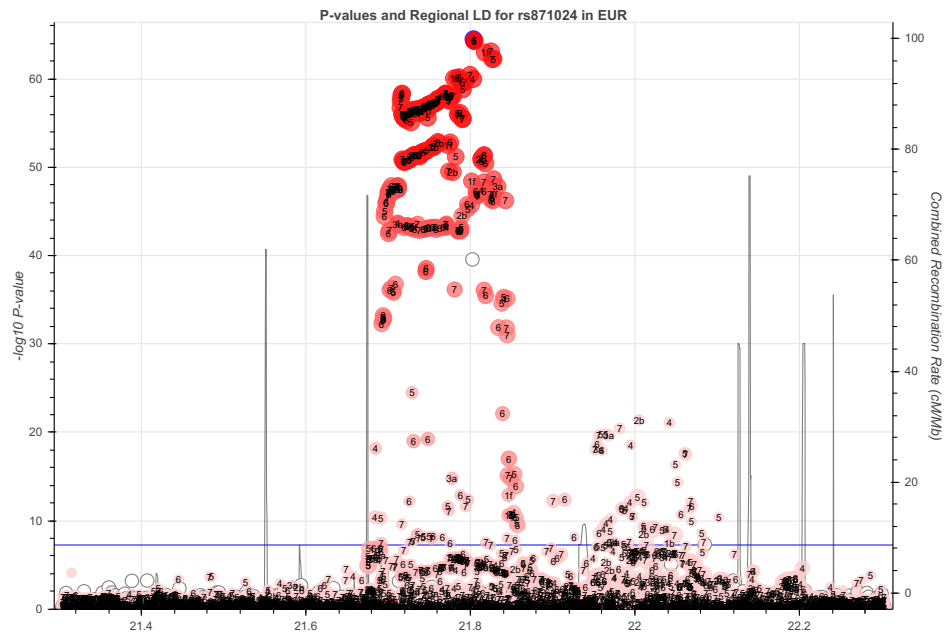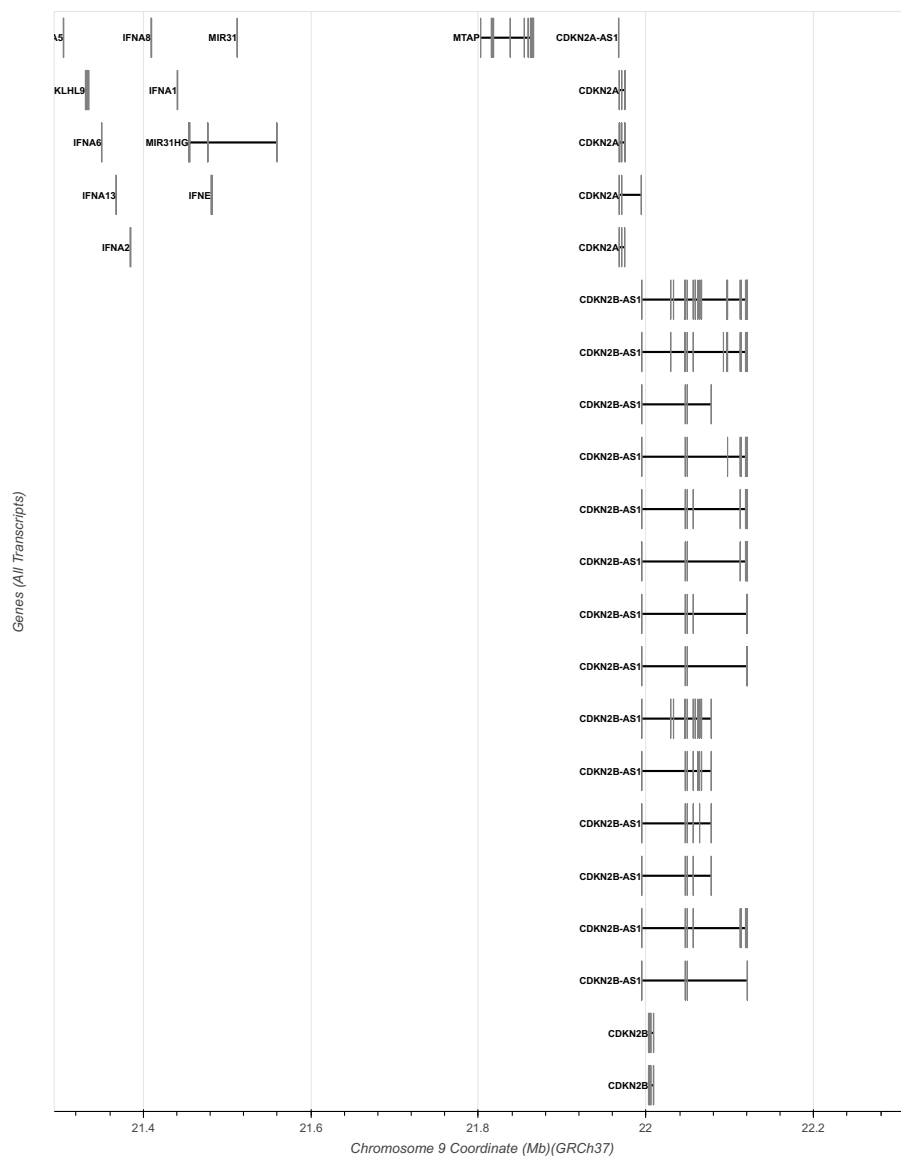

P-values and Regional LD for rs10739220 in EUR

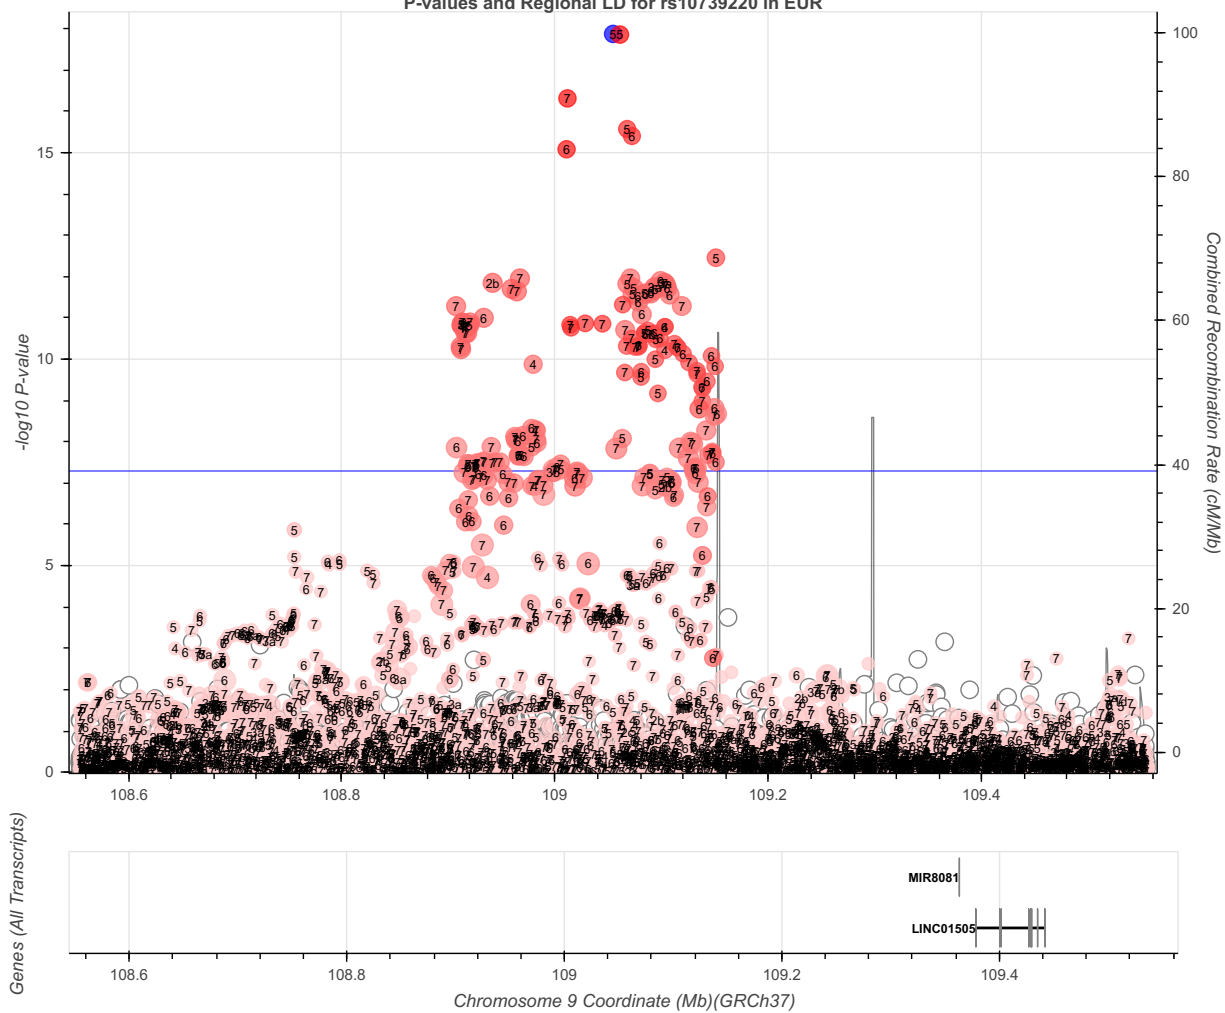

P-values and Regional LD for rs1339759 in EUR

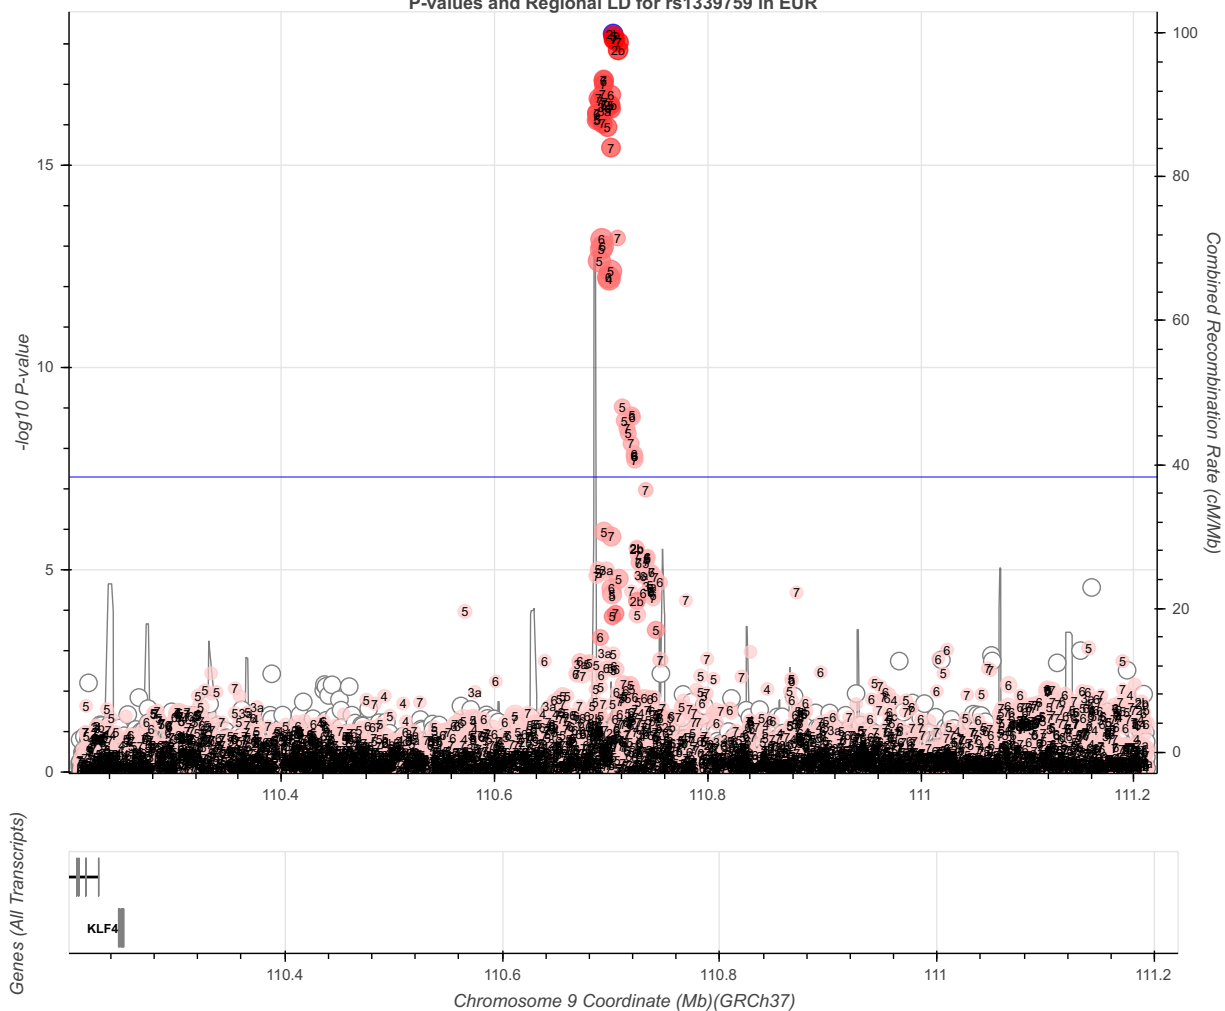

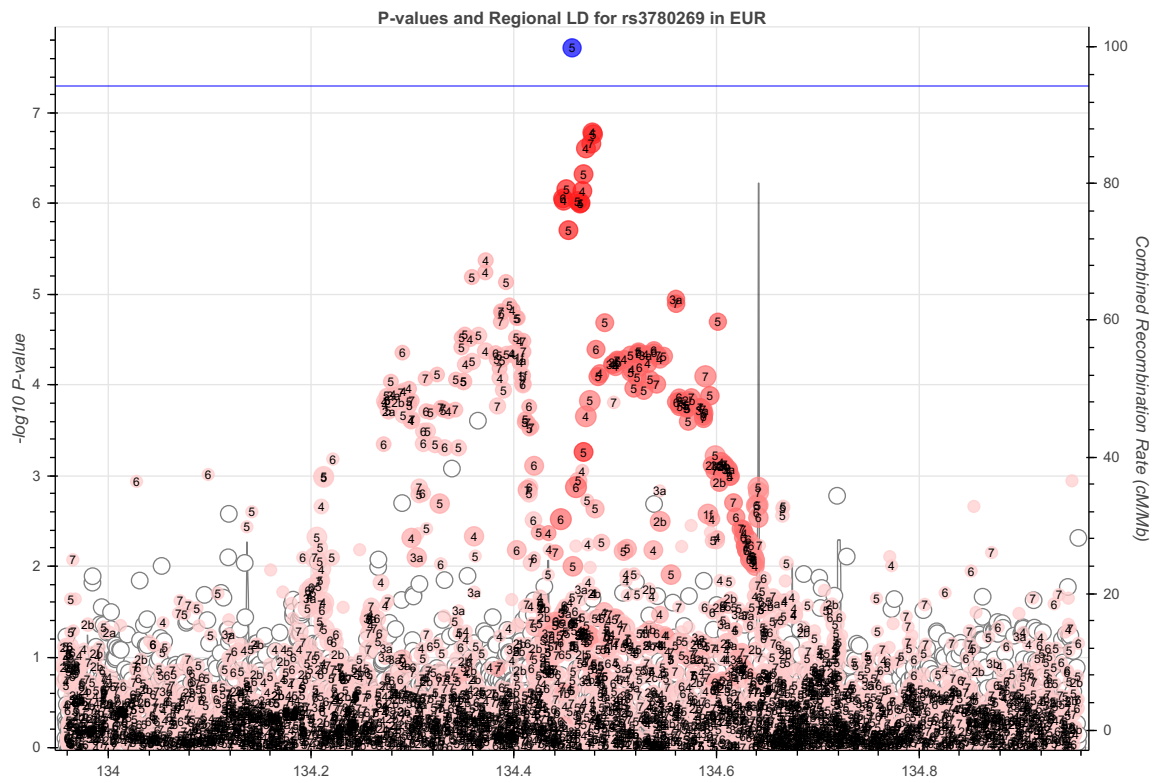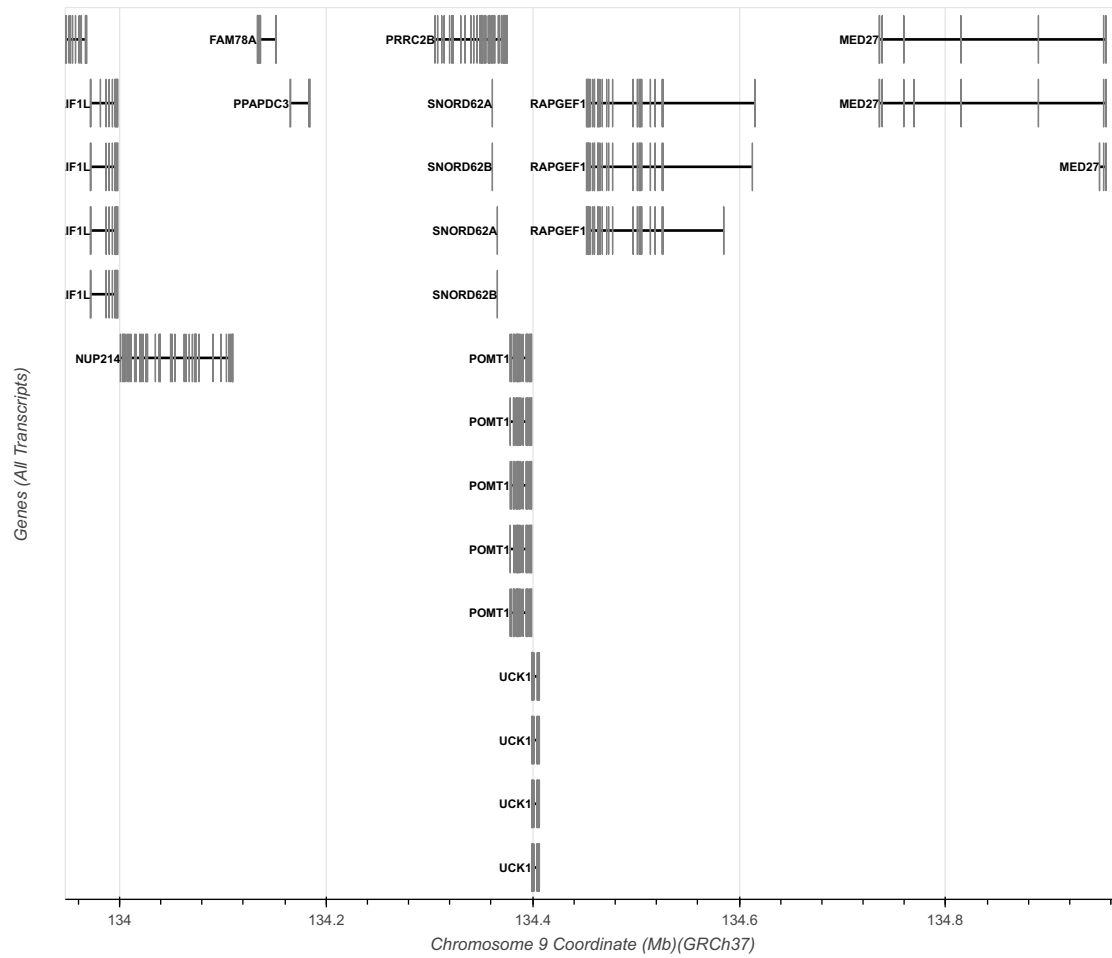

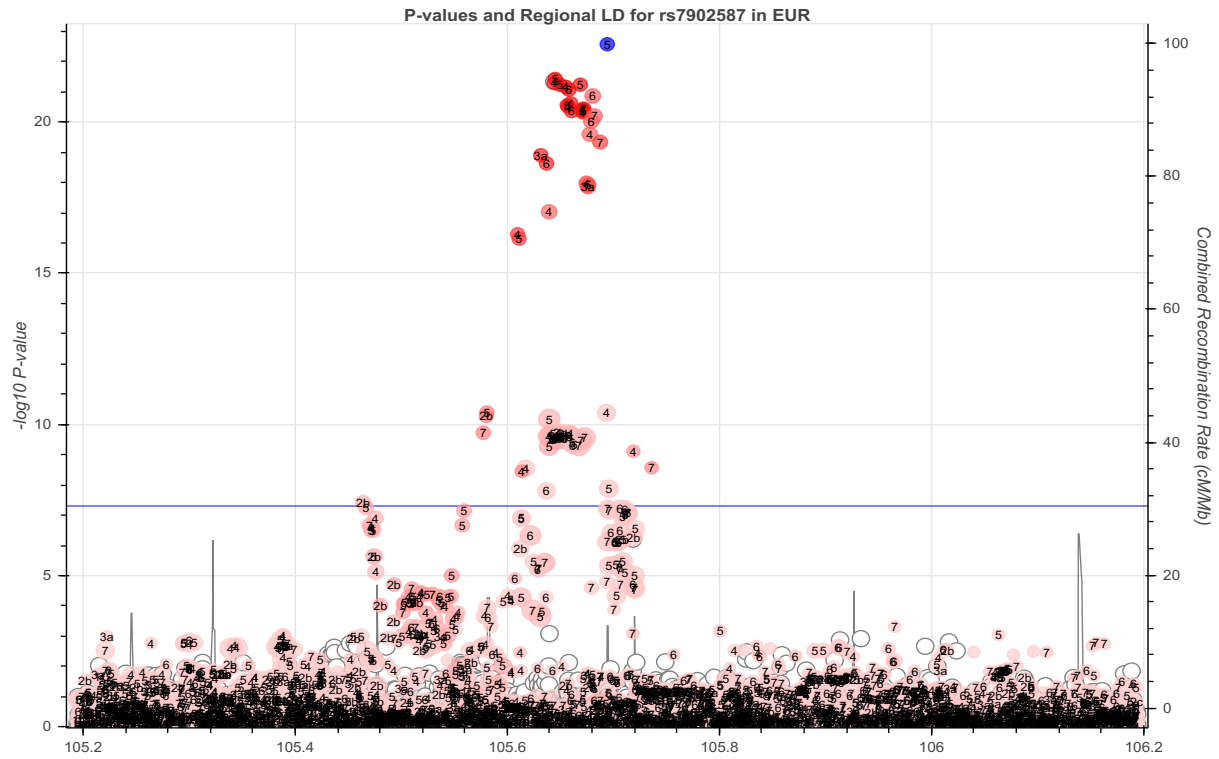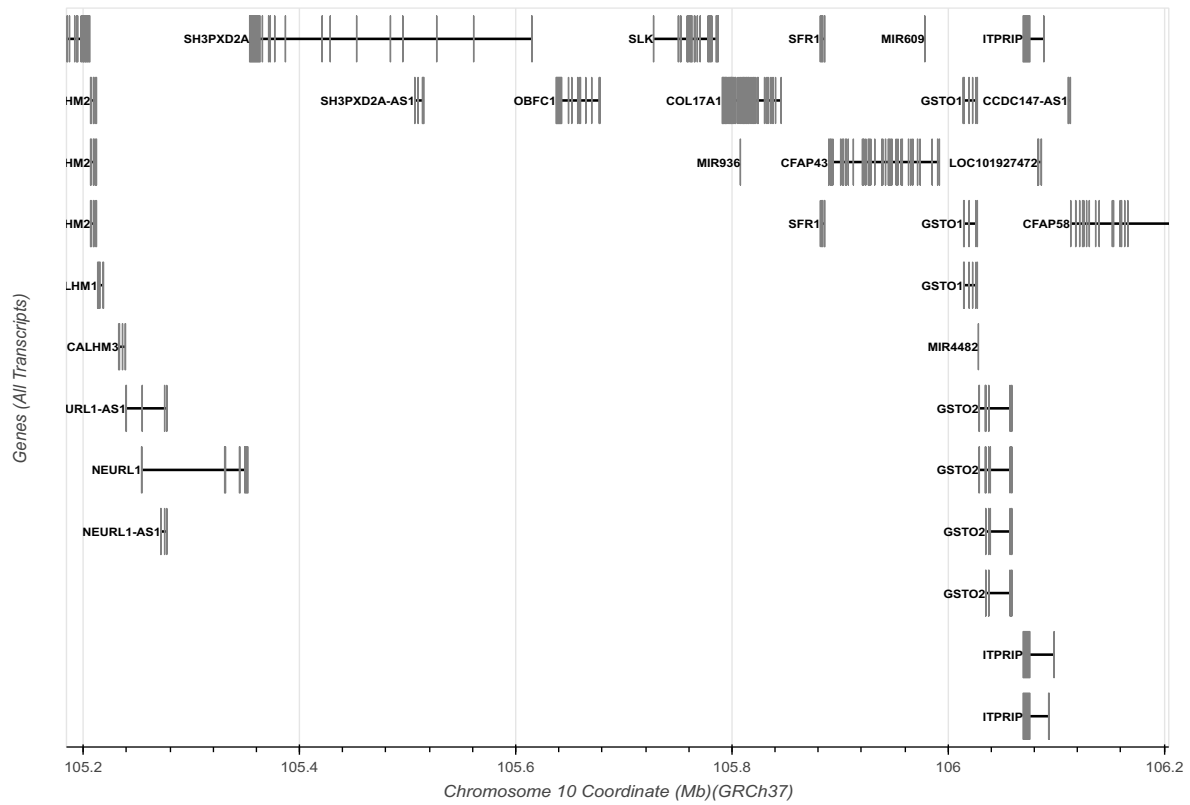

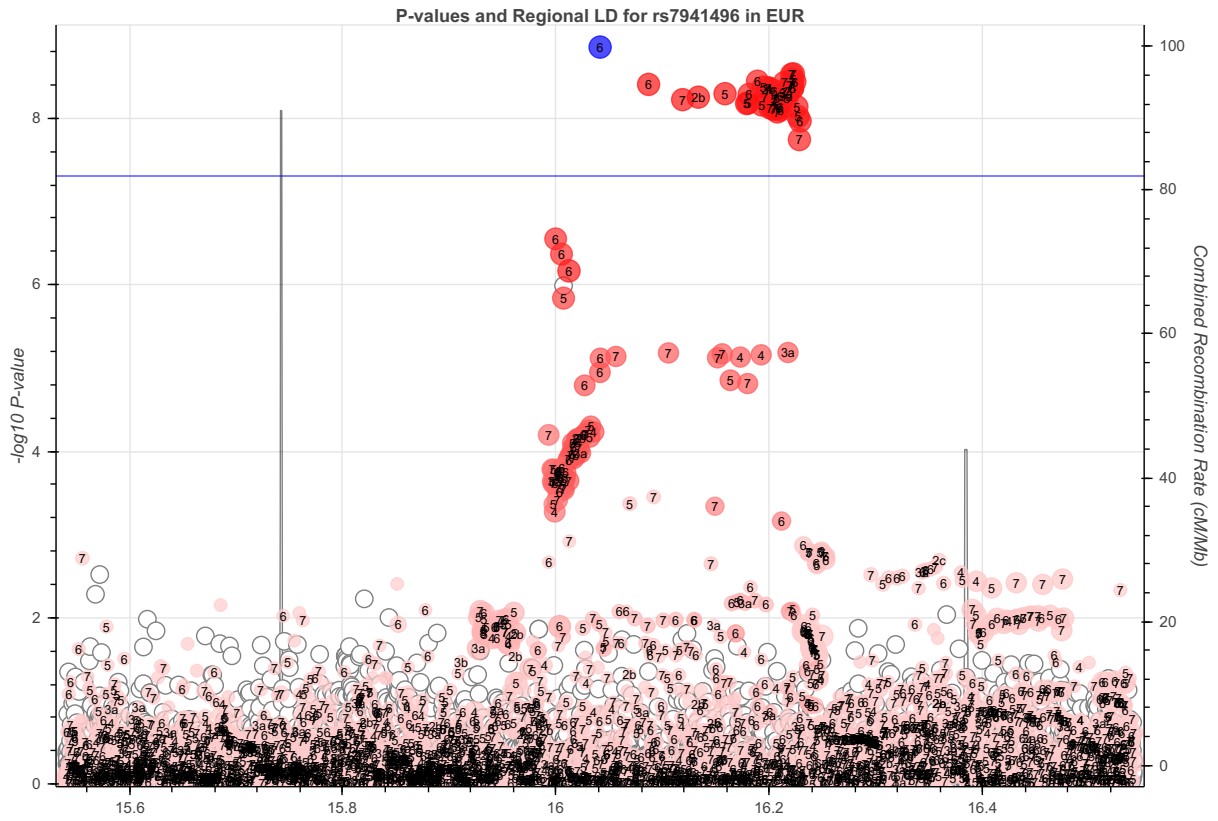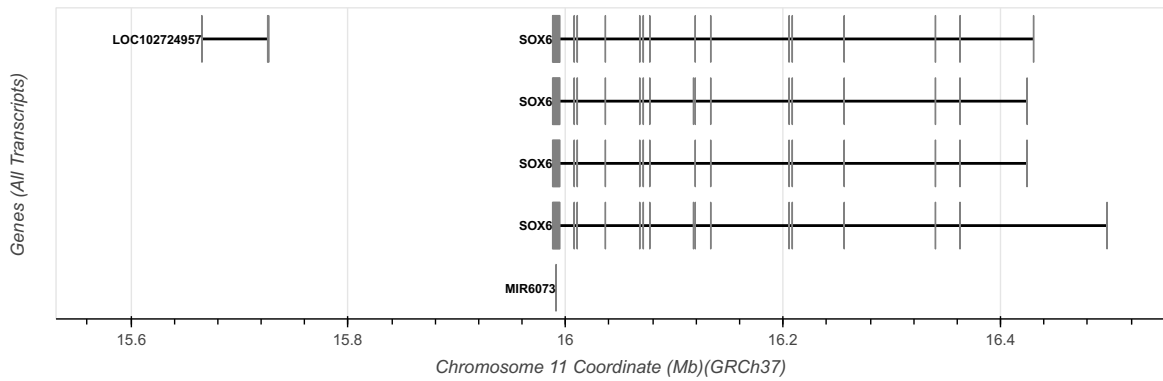

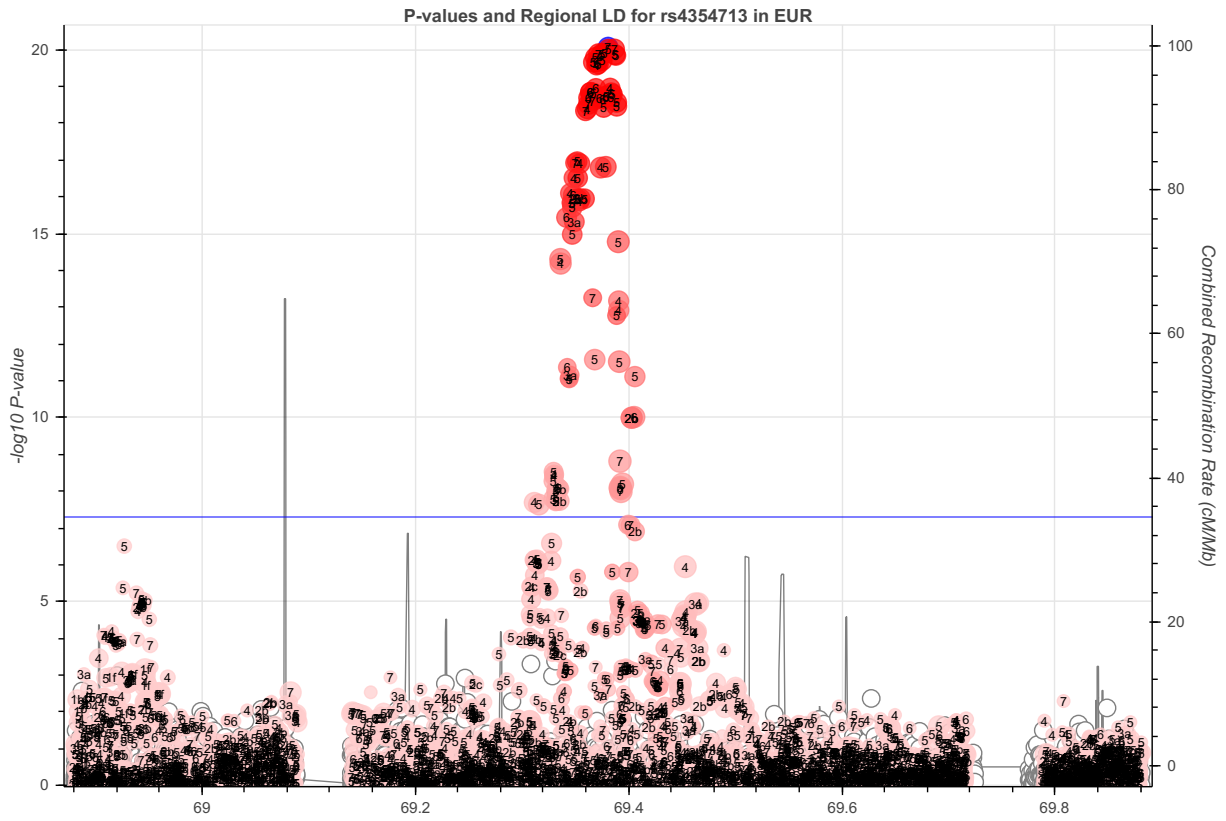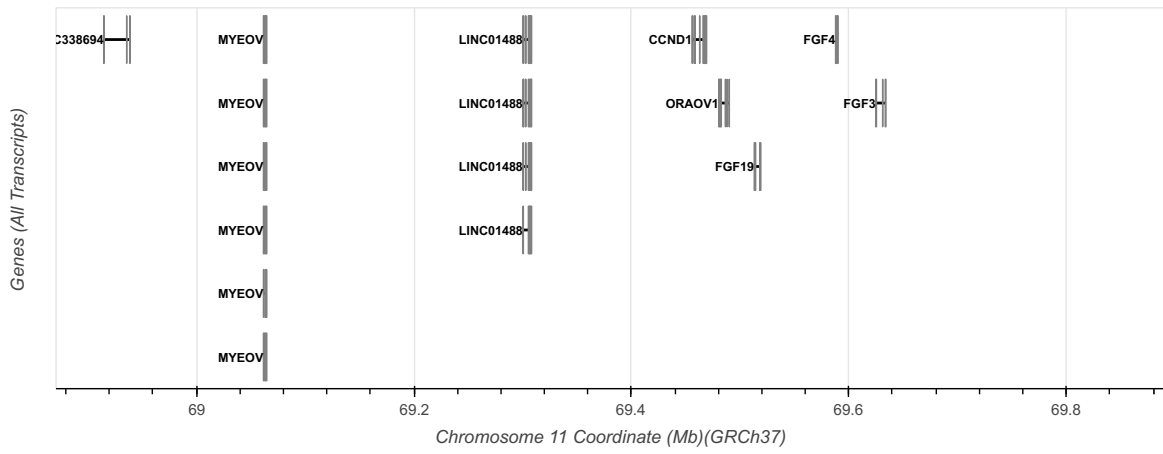



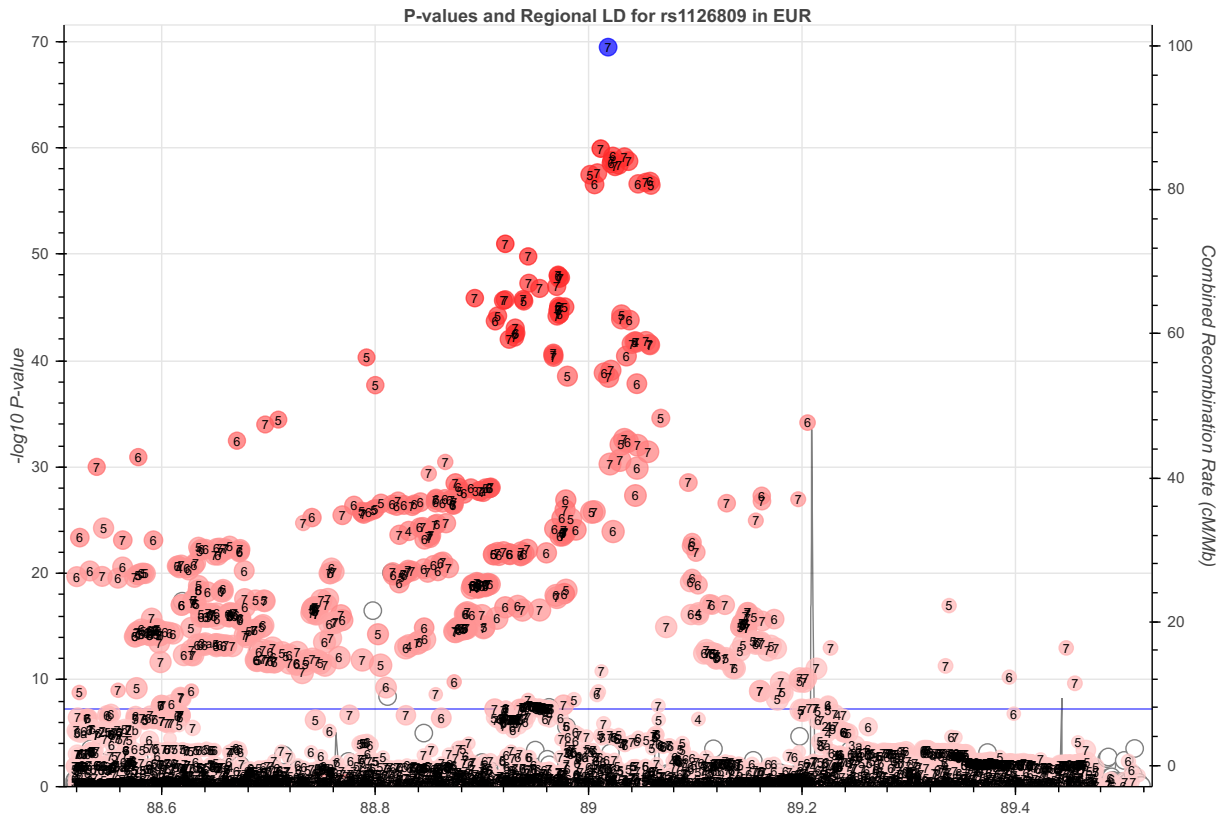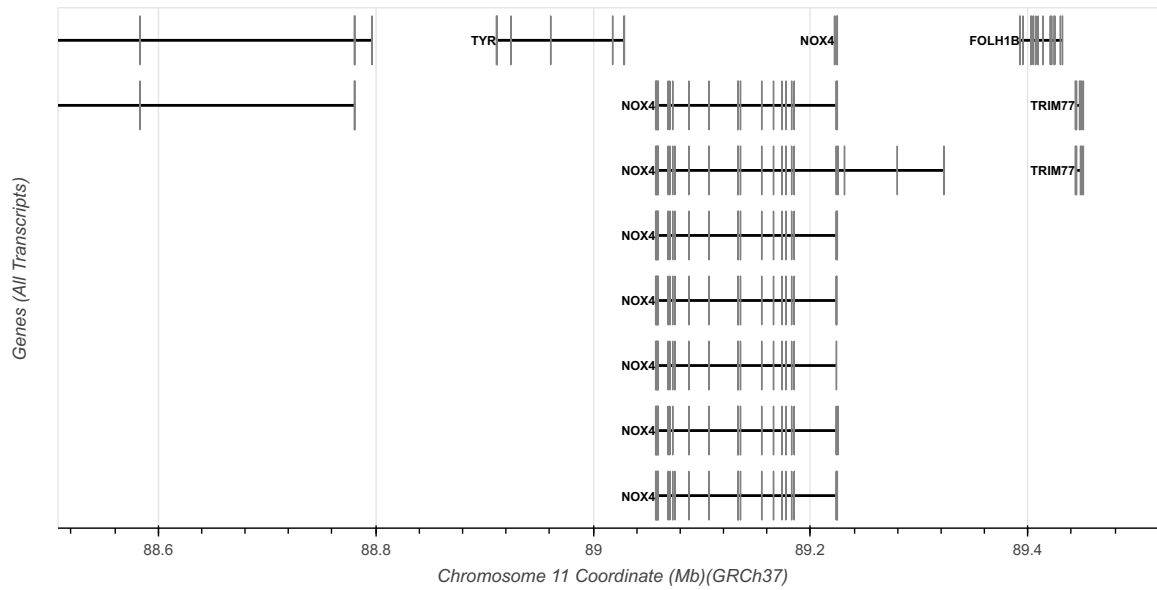

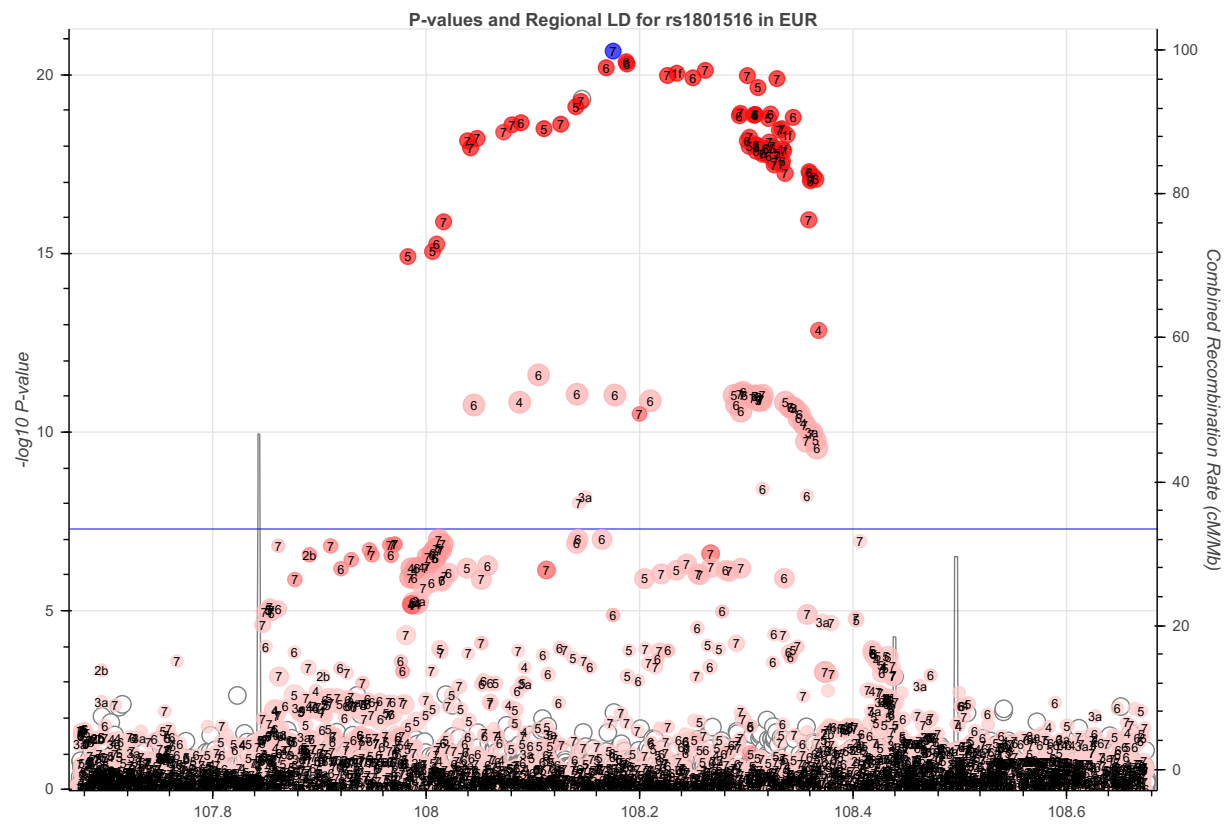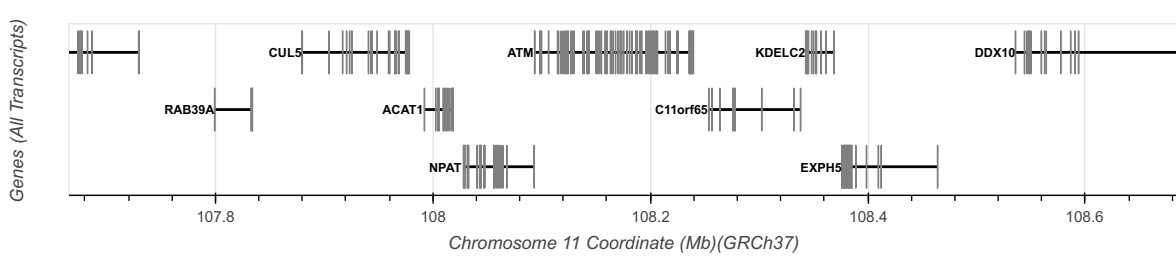

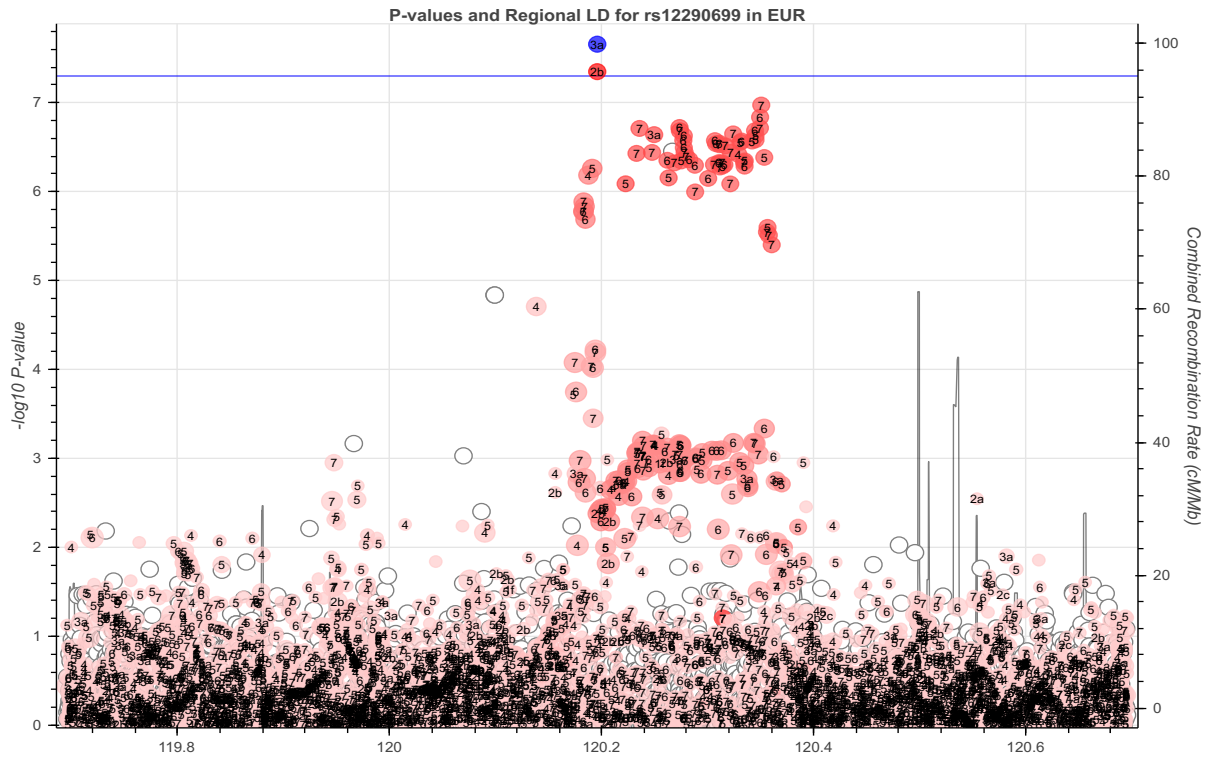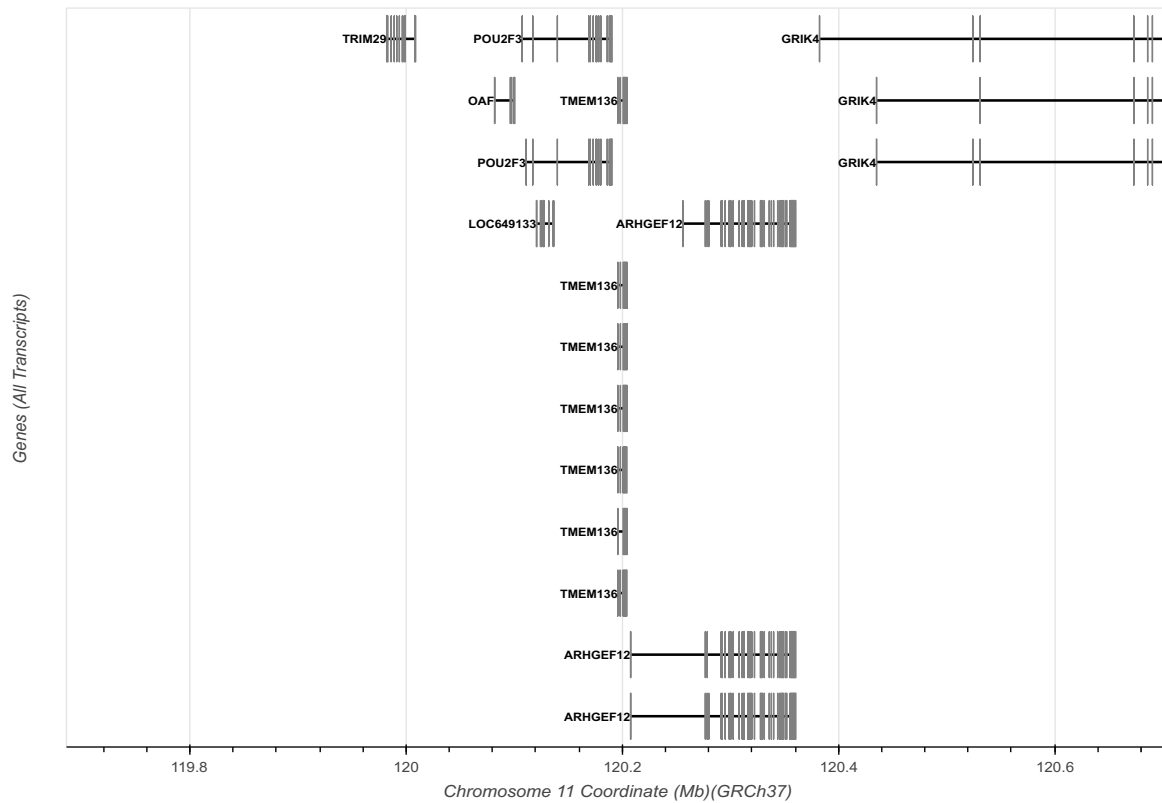

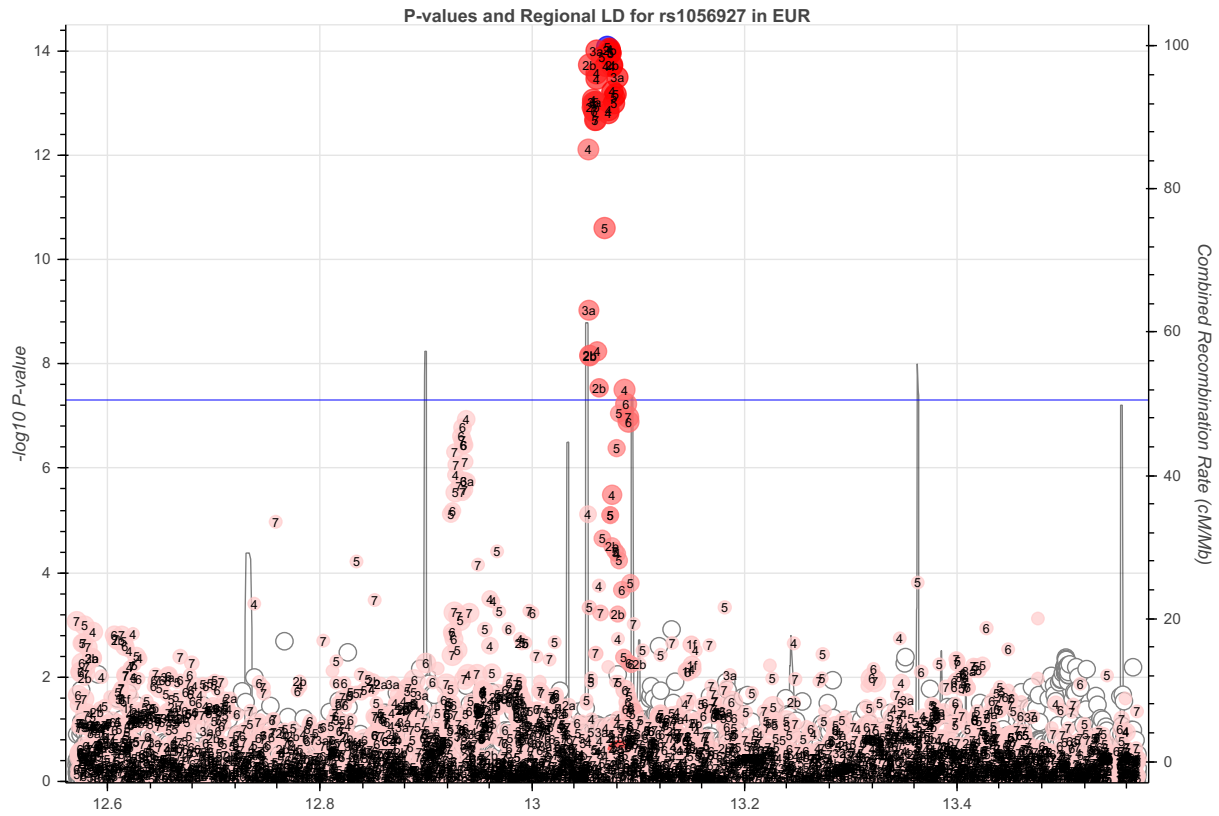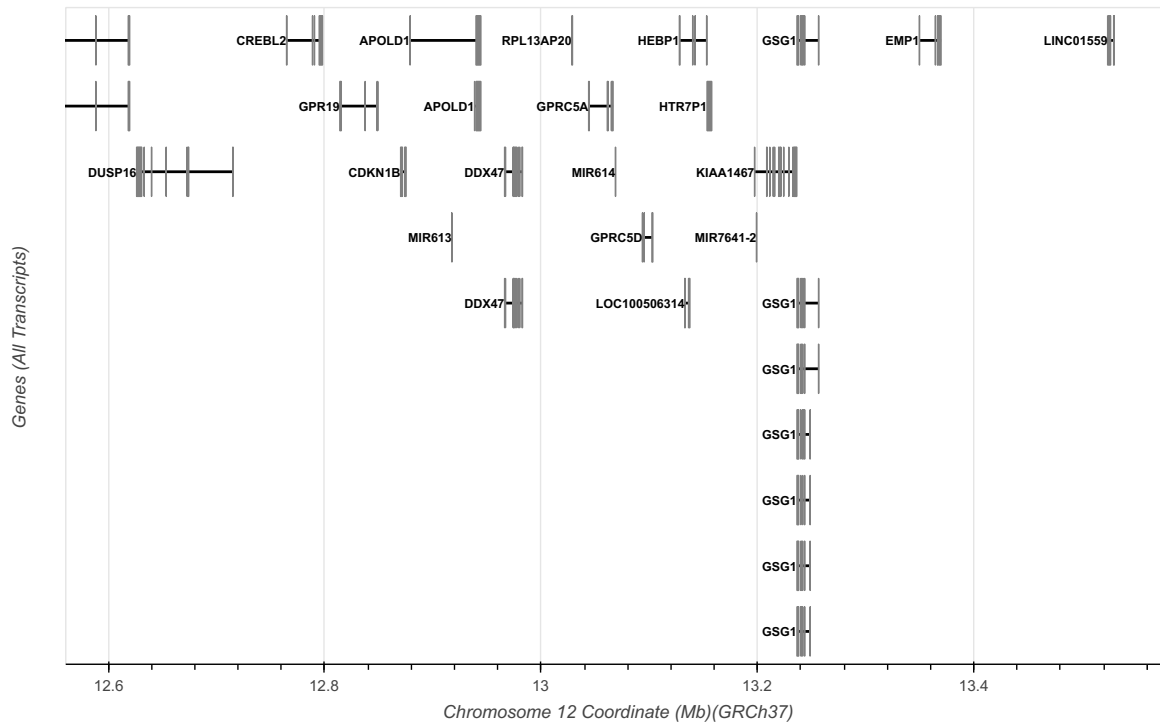

P-values and Regional LD for rs4237963 in EUR

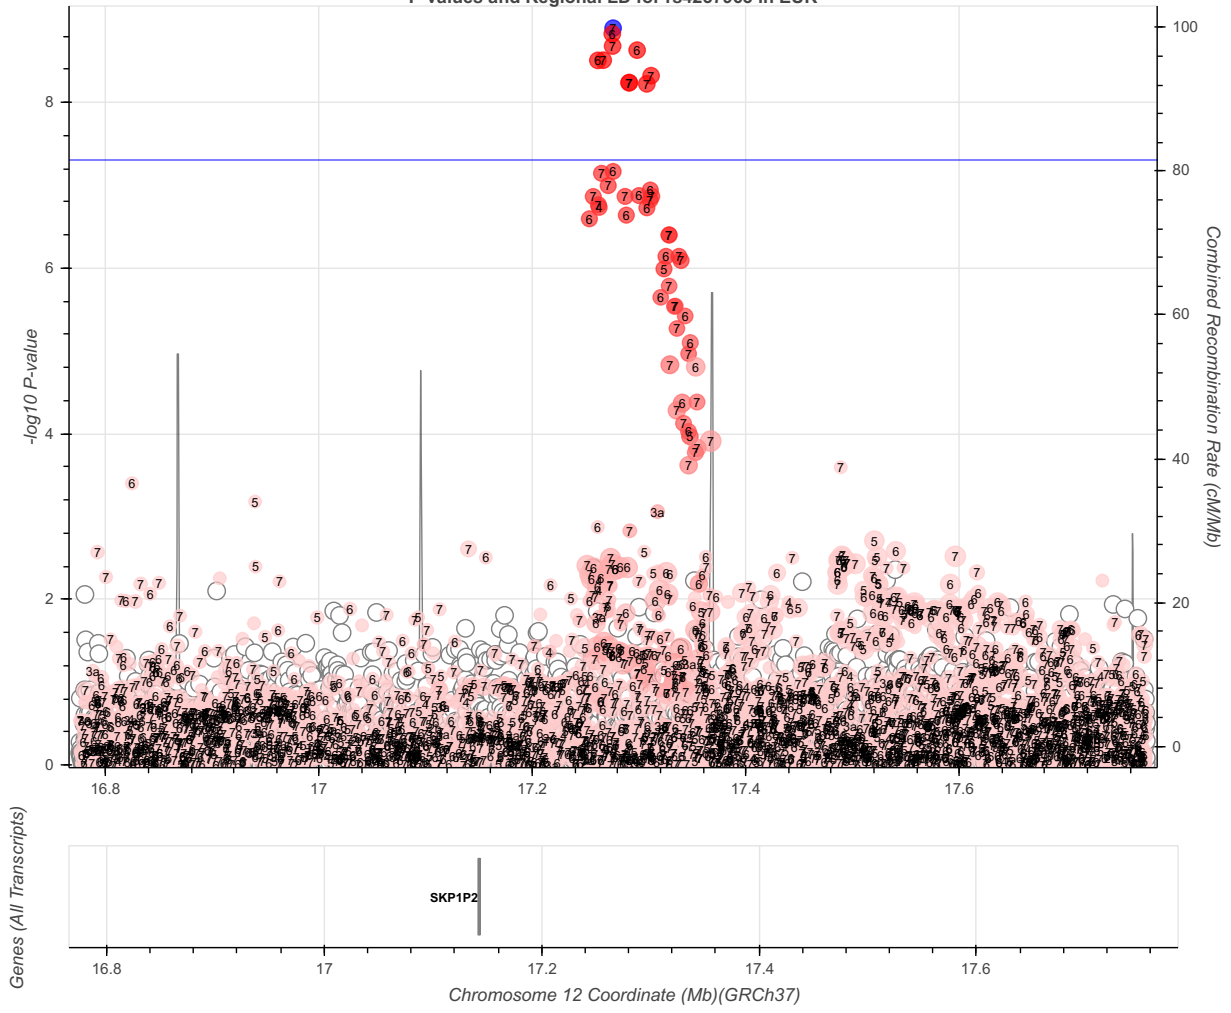

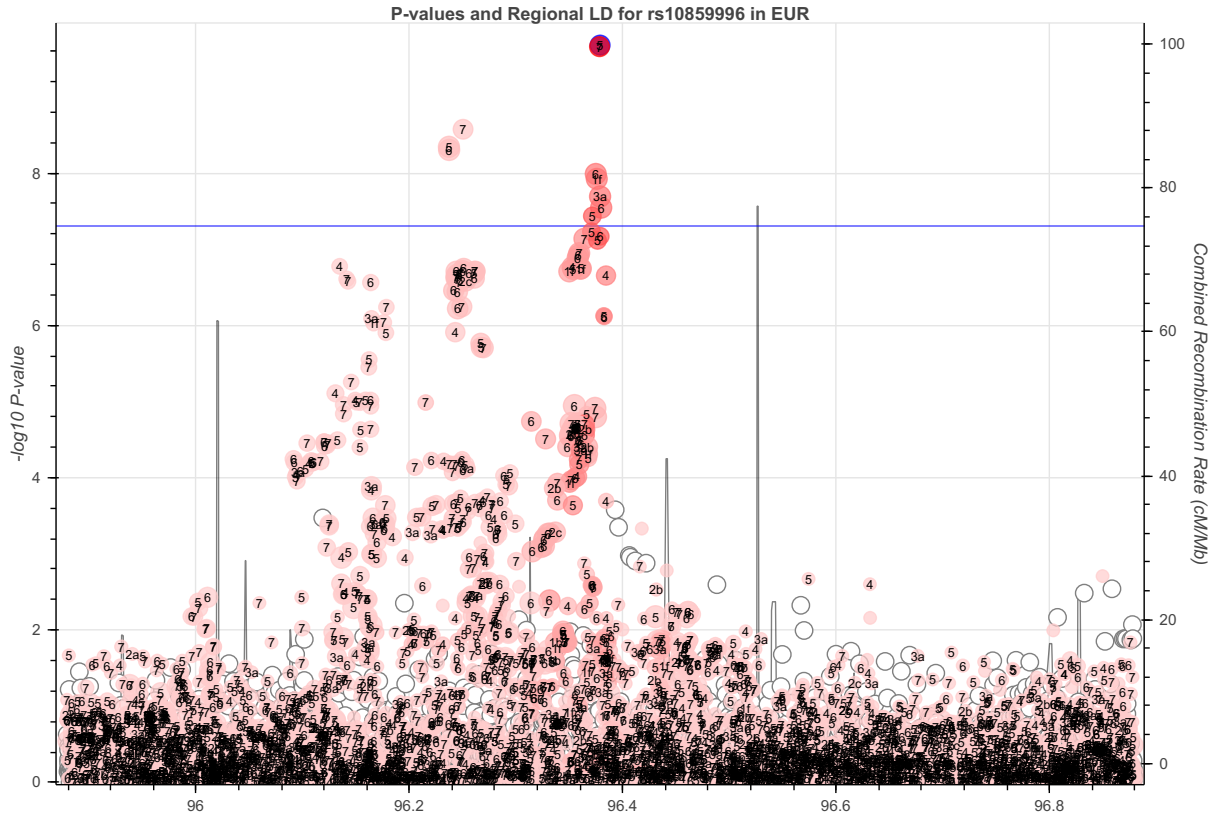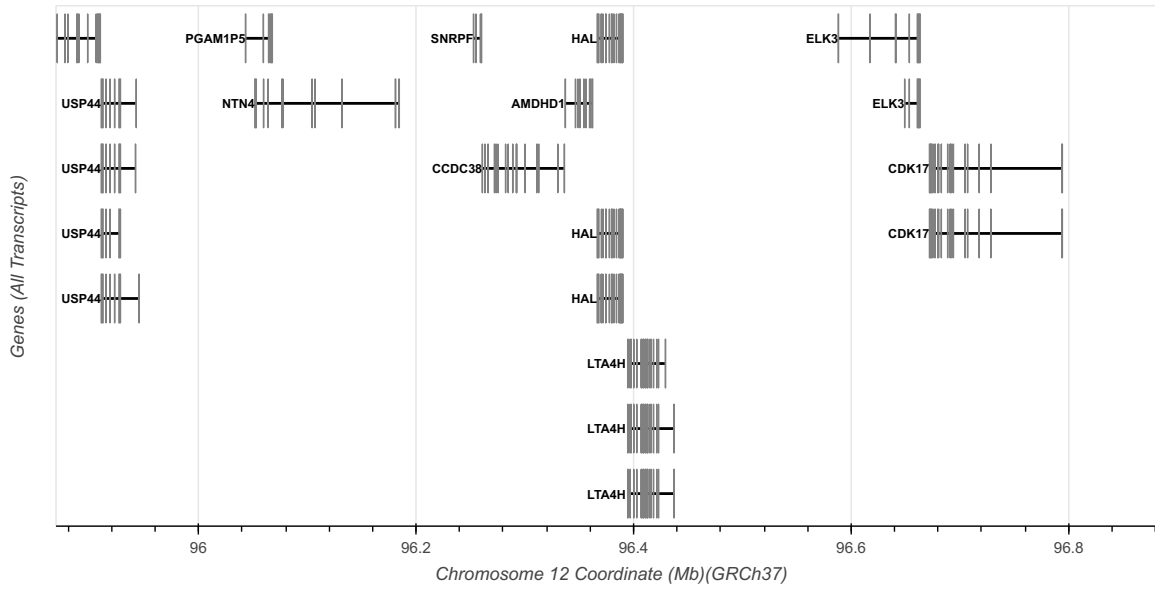

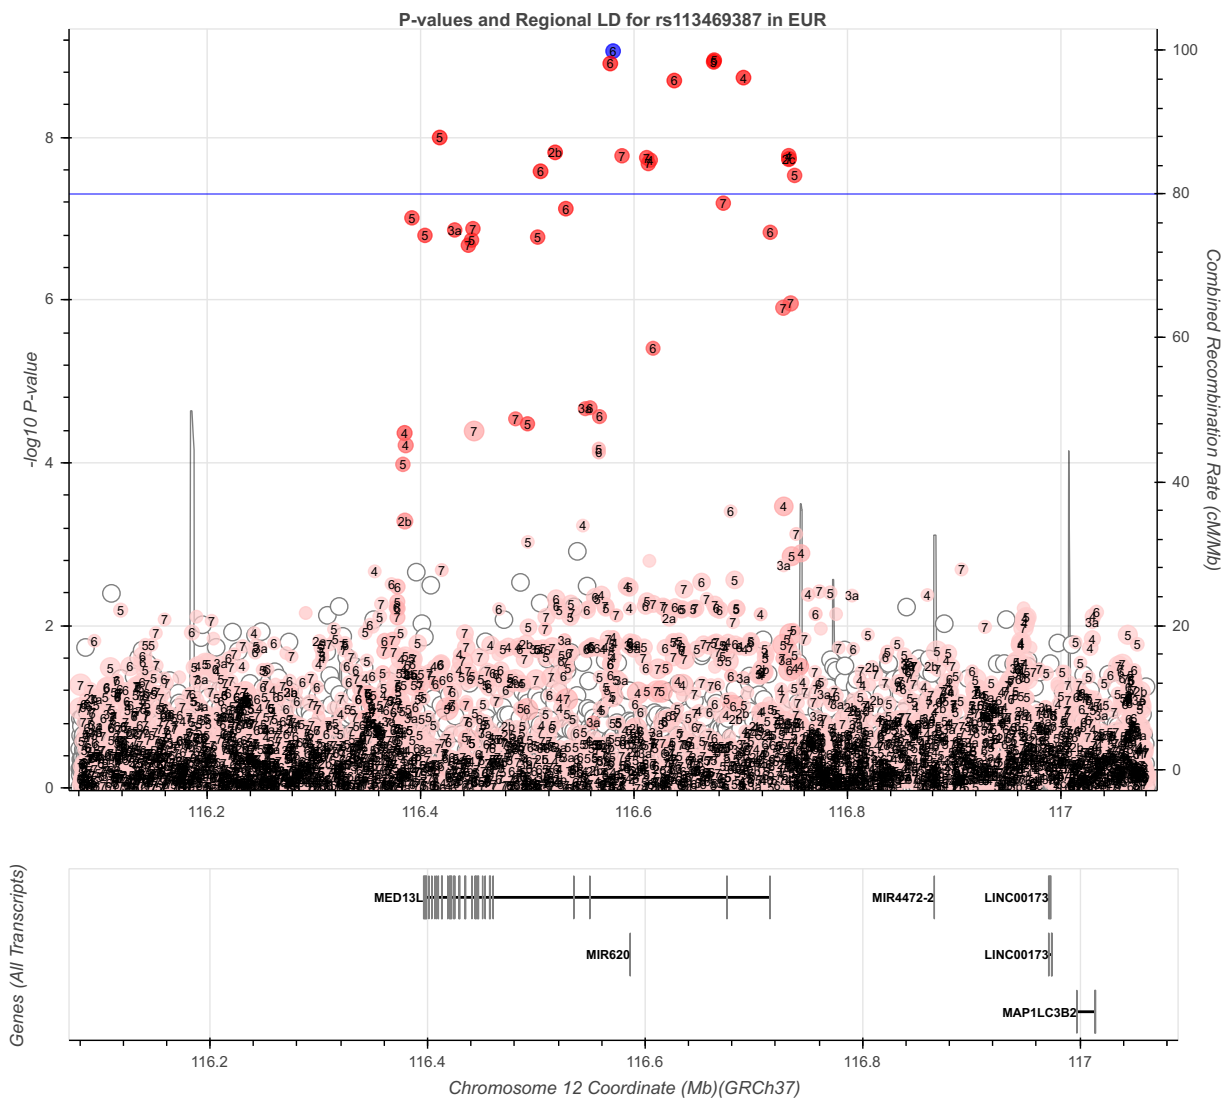





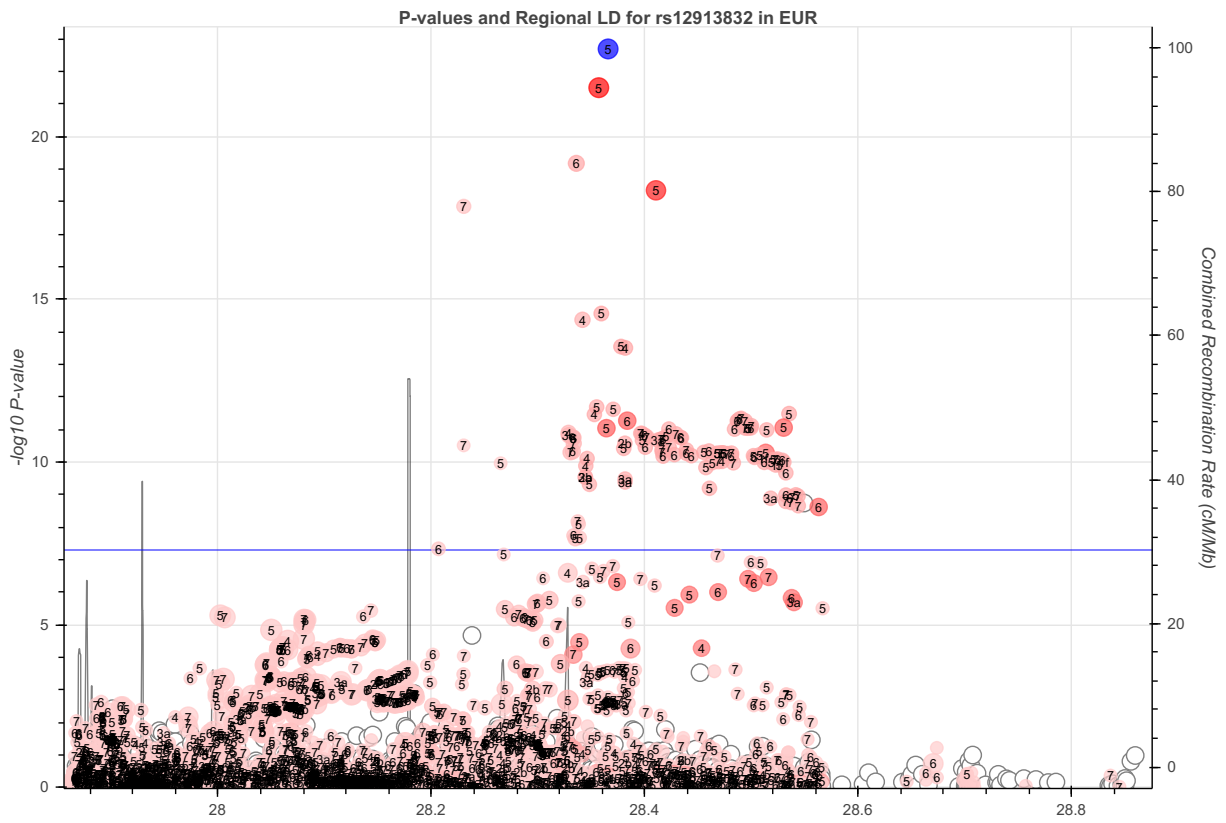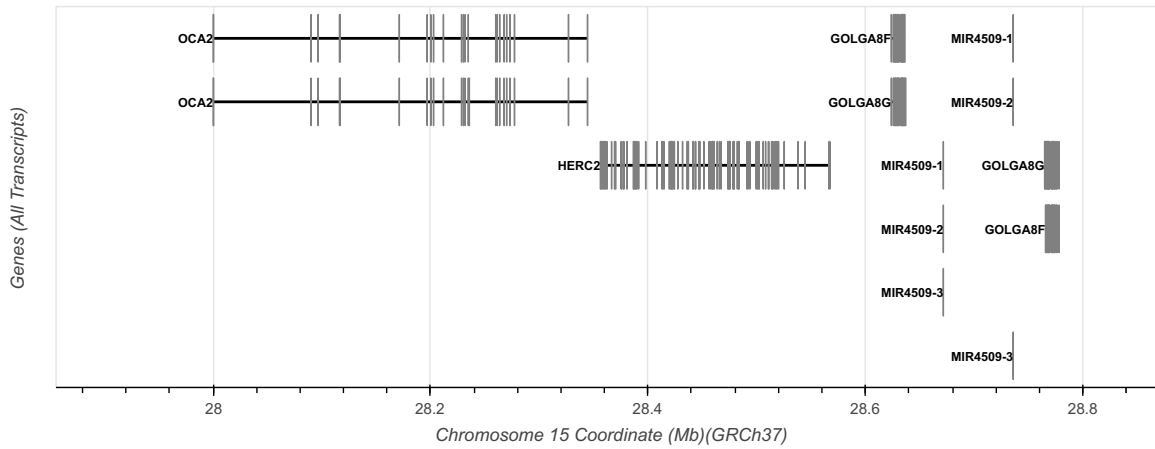



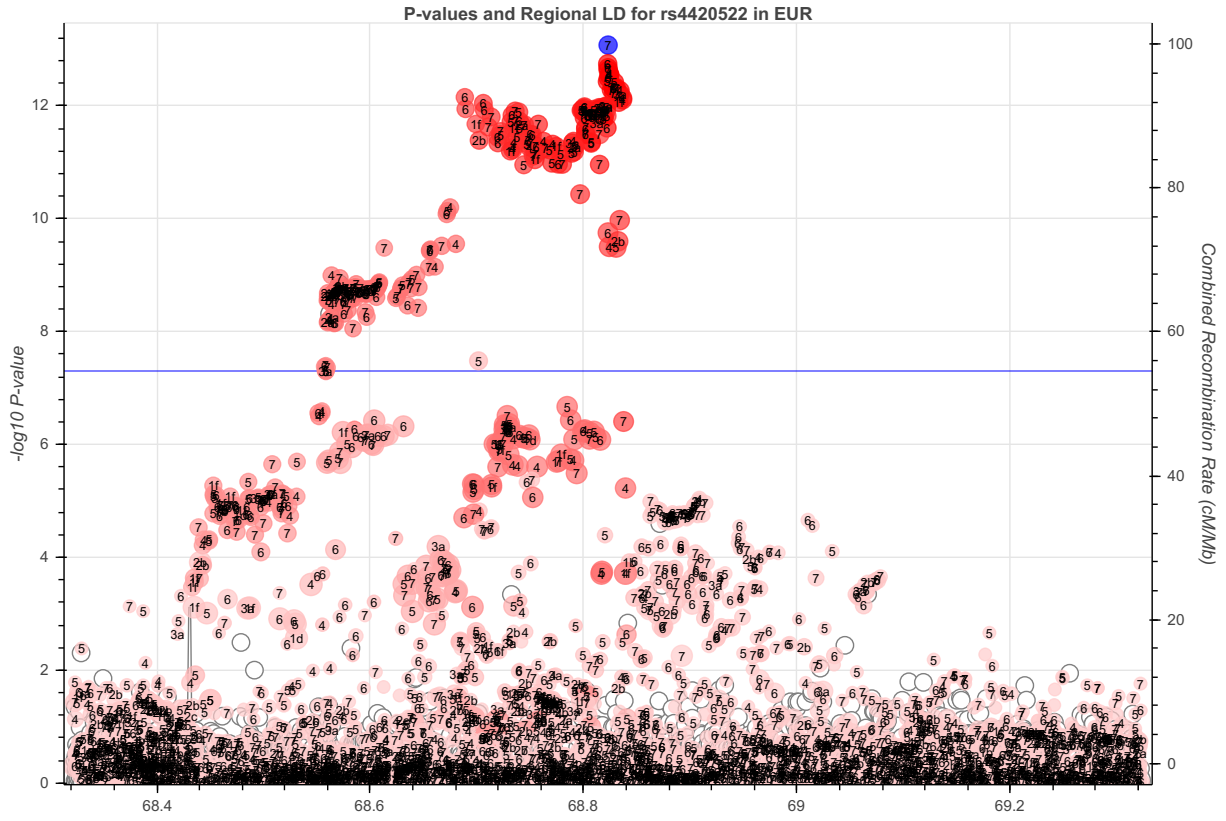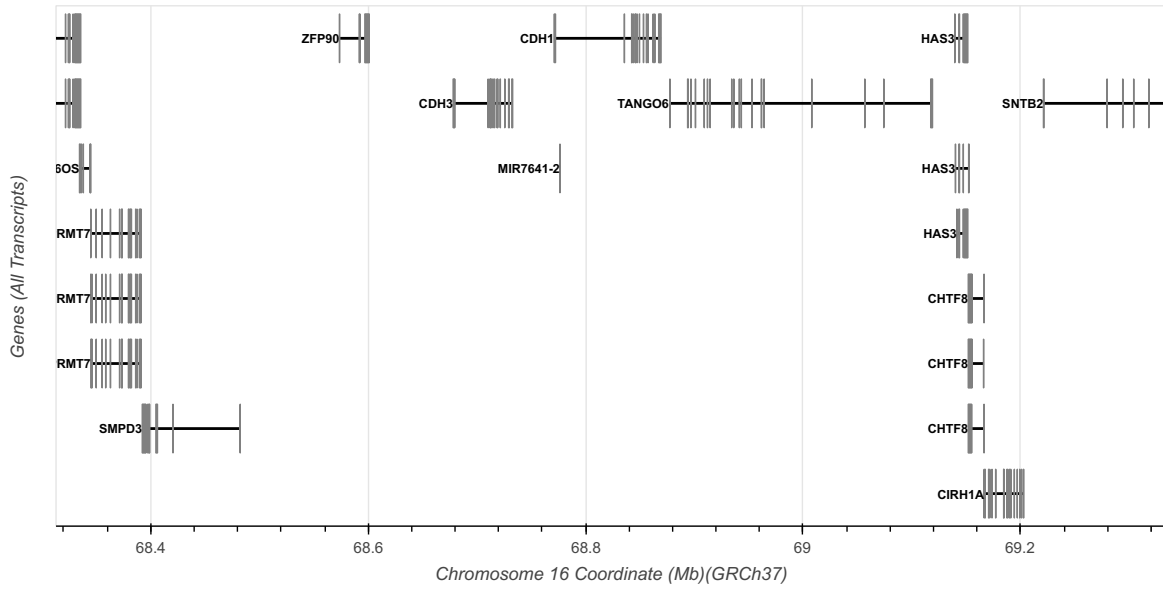

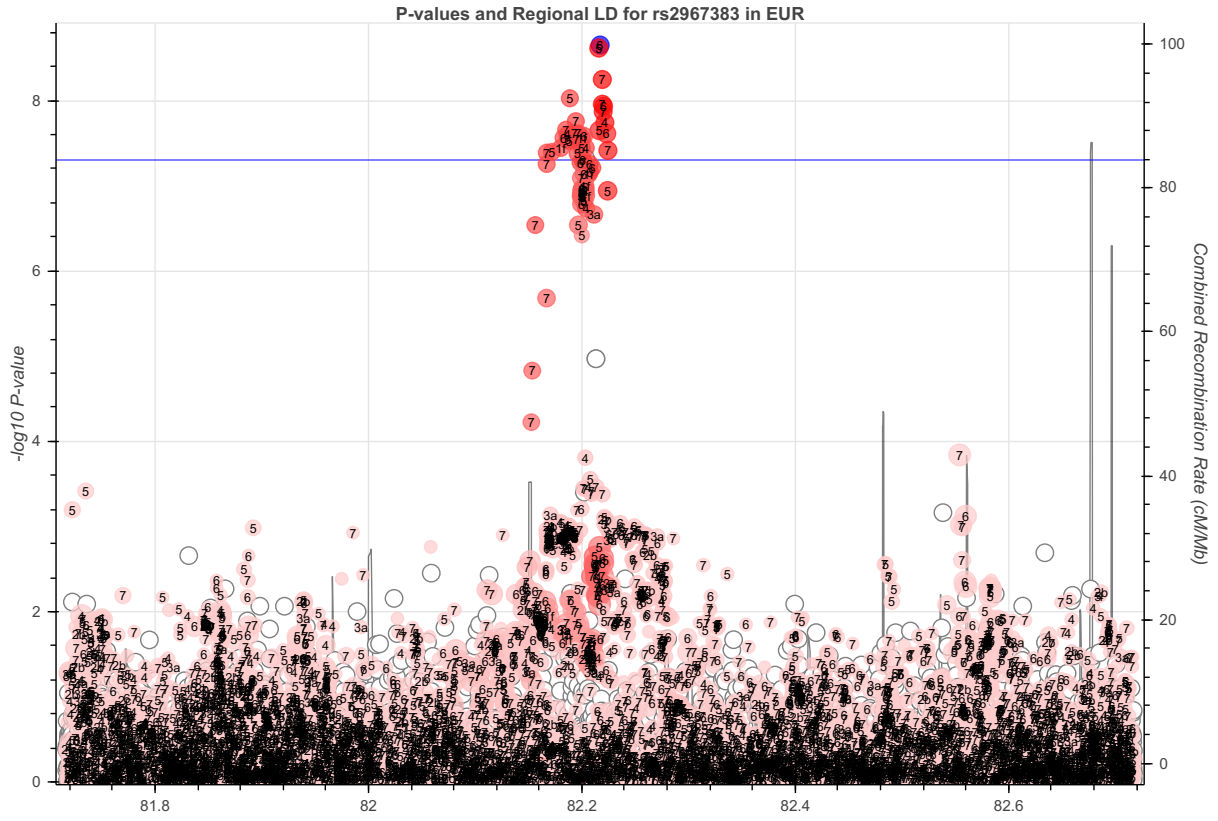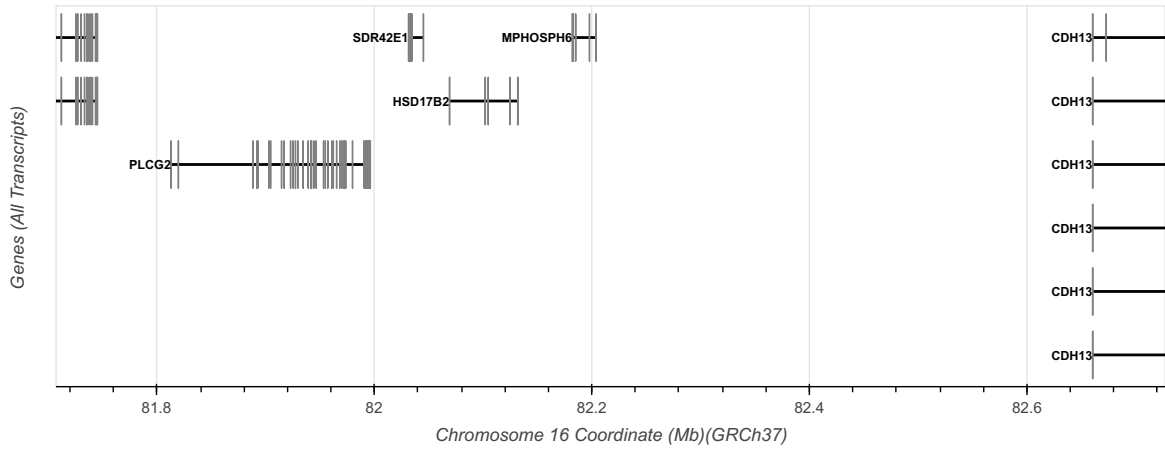

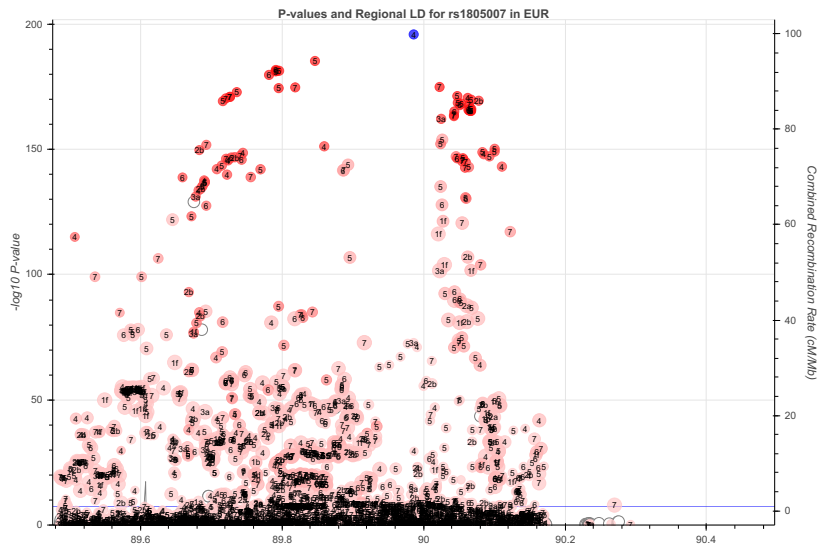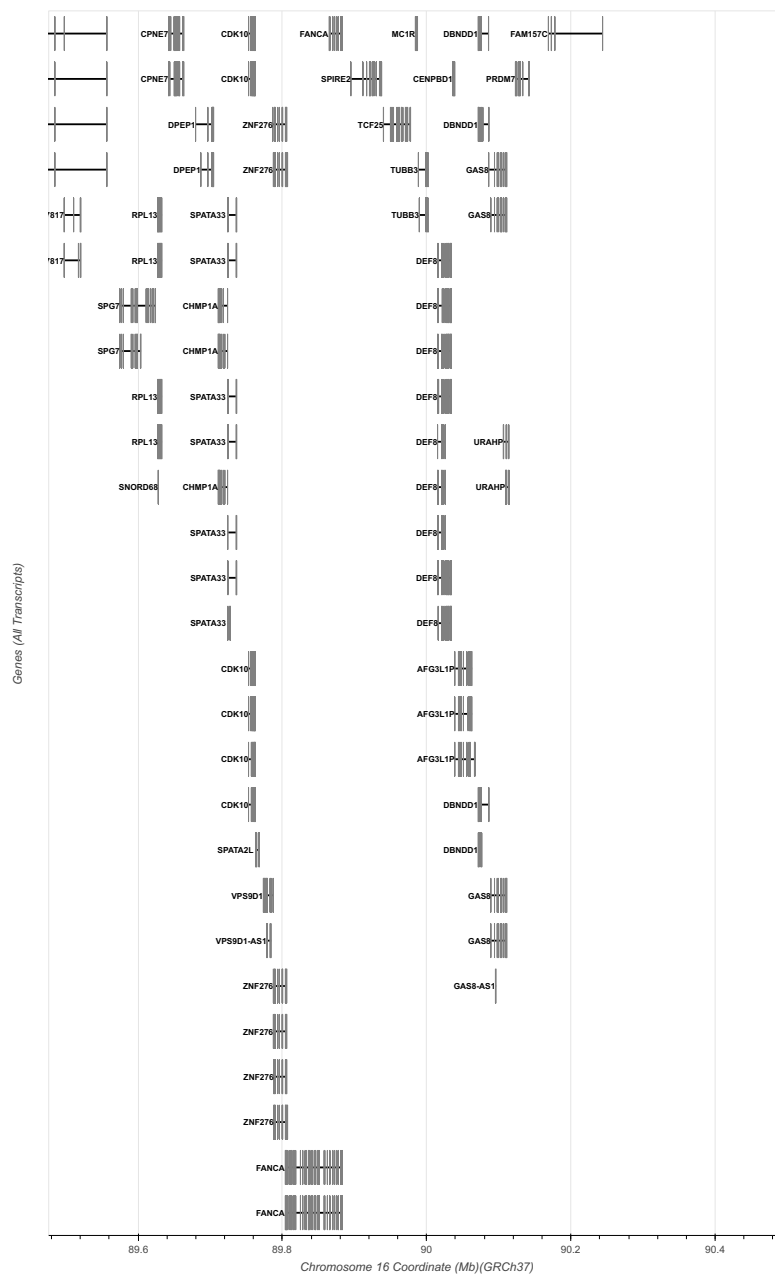

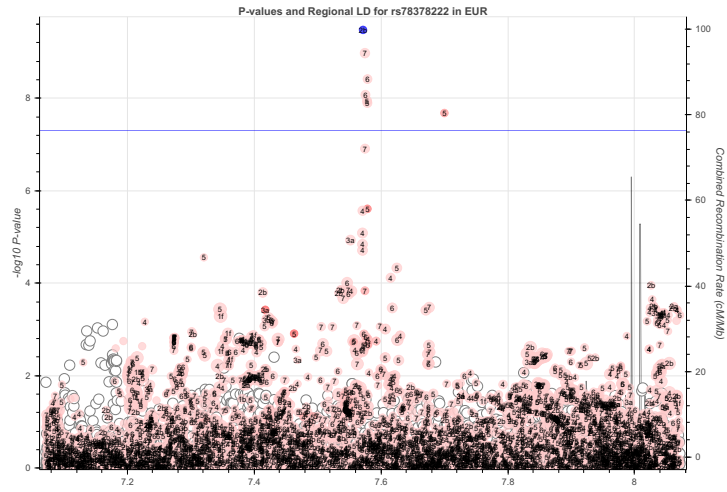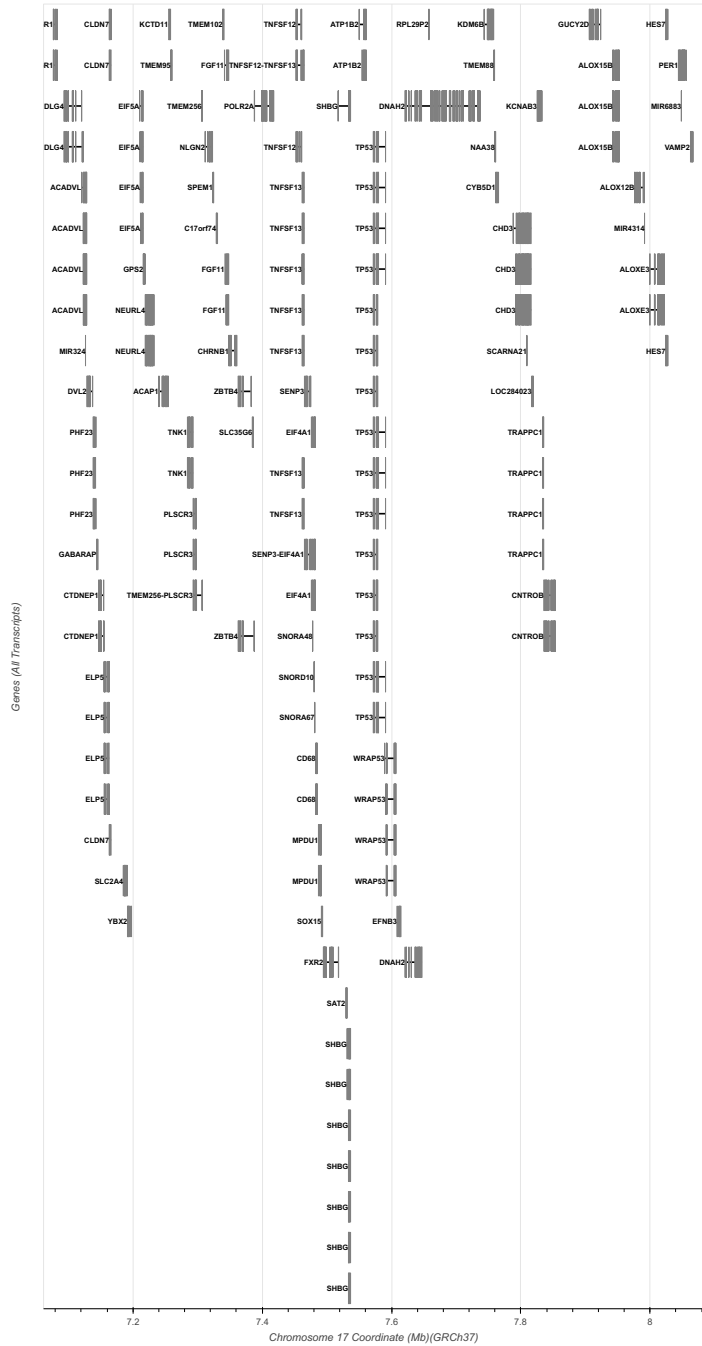

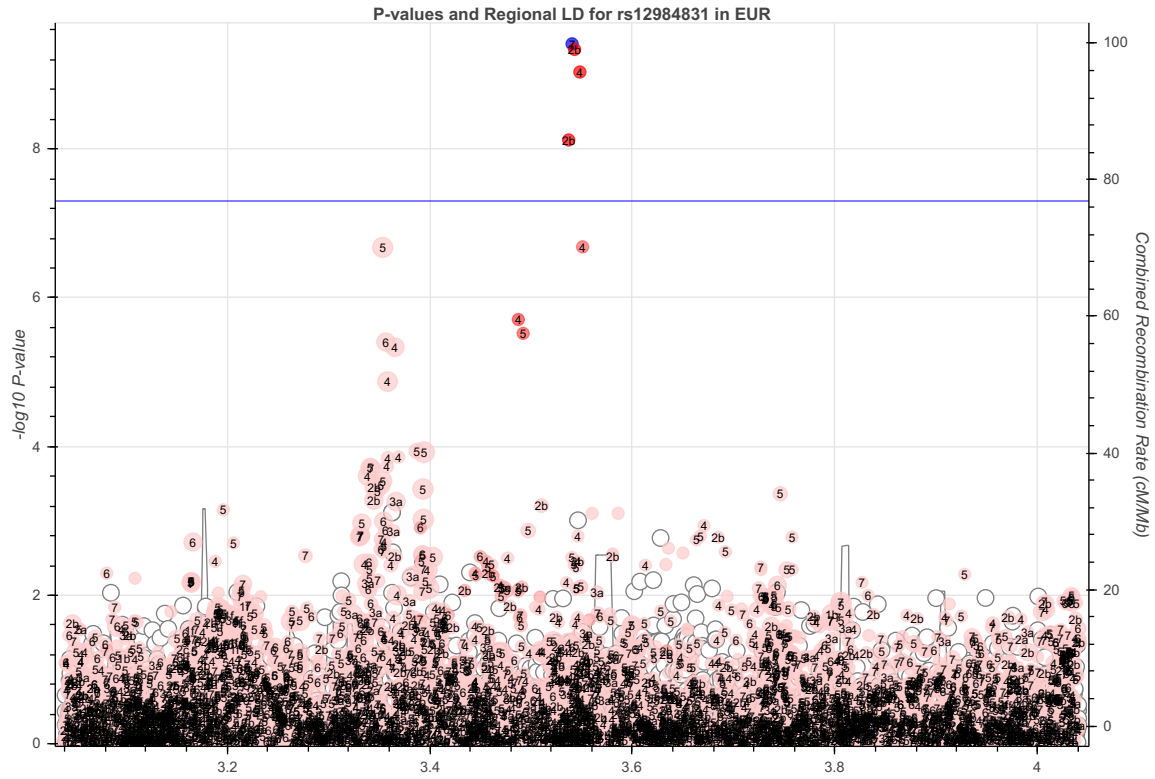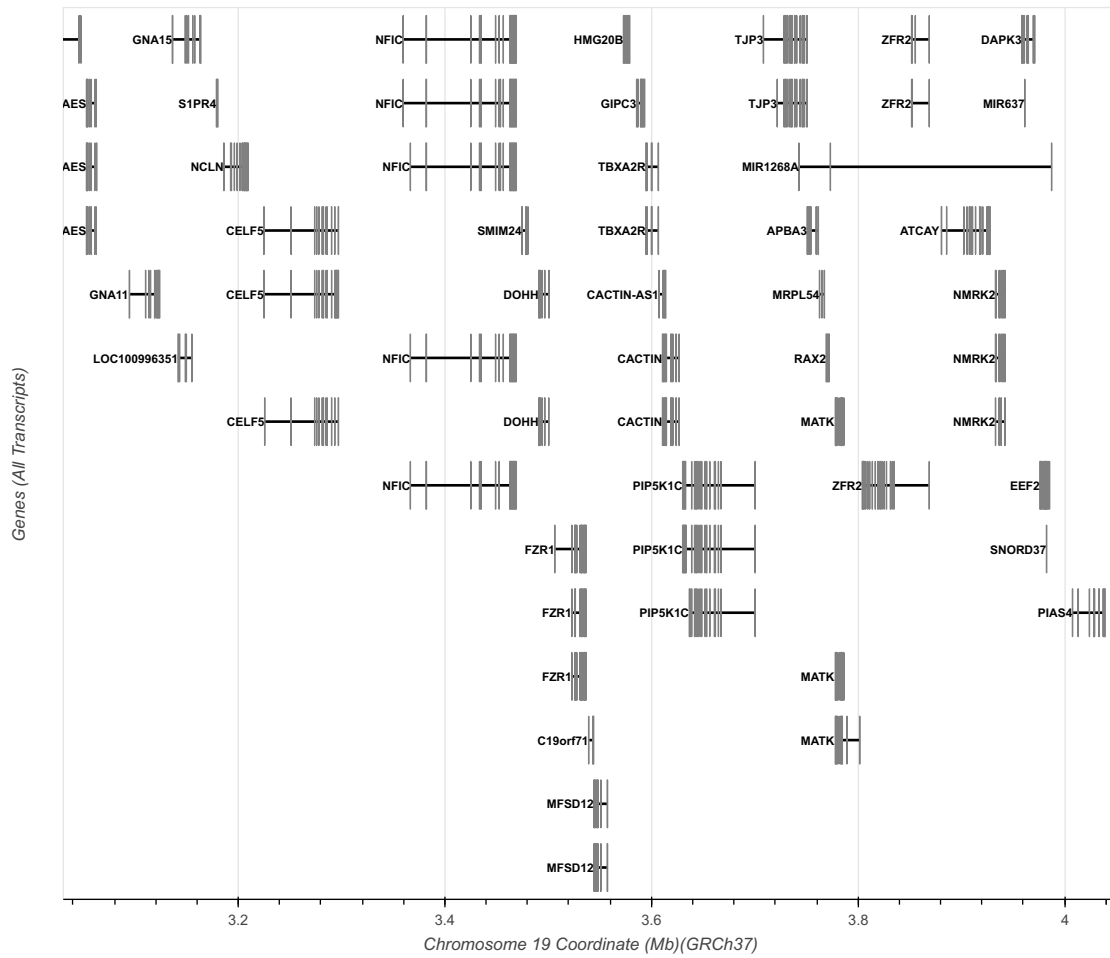

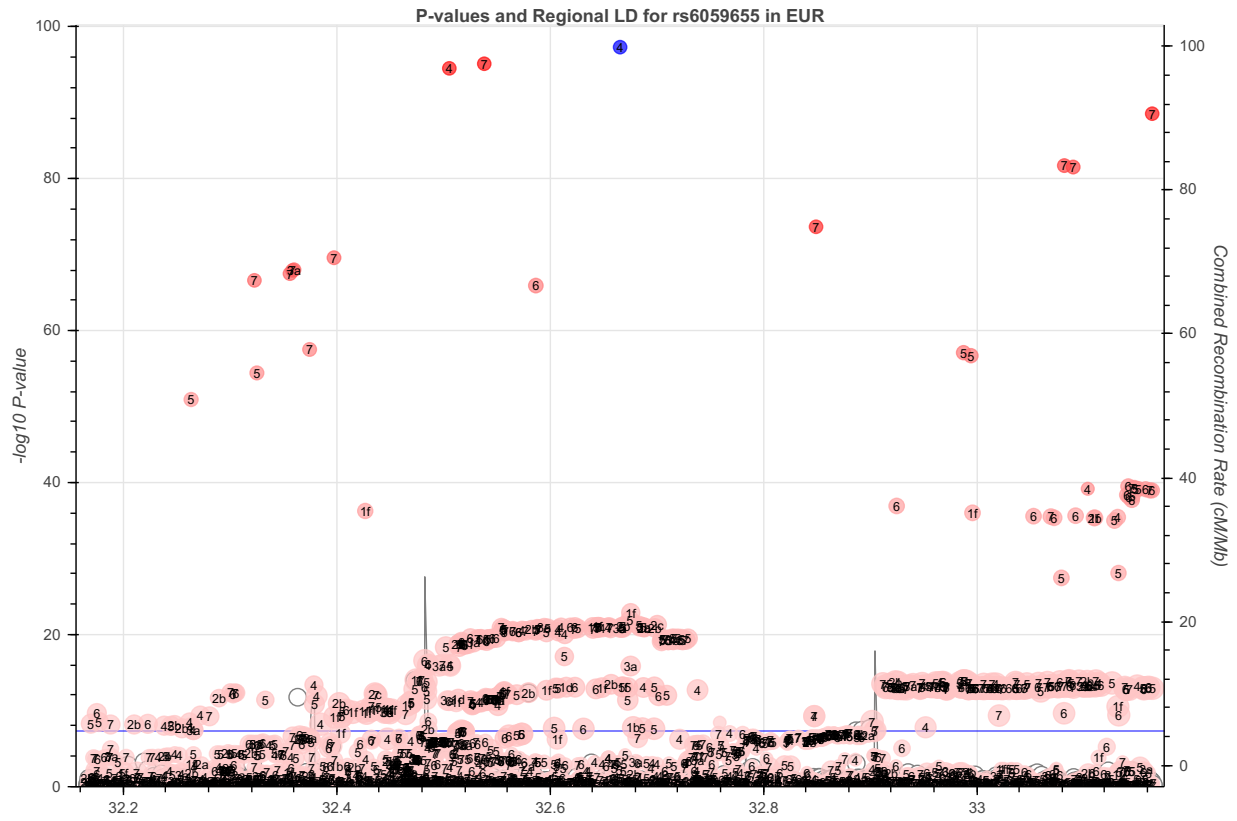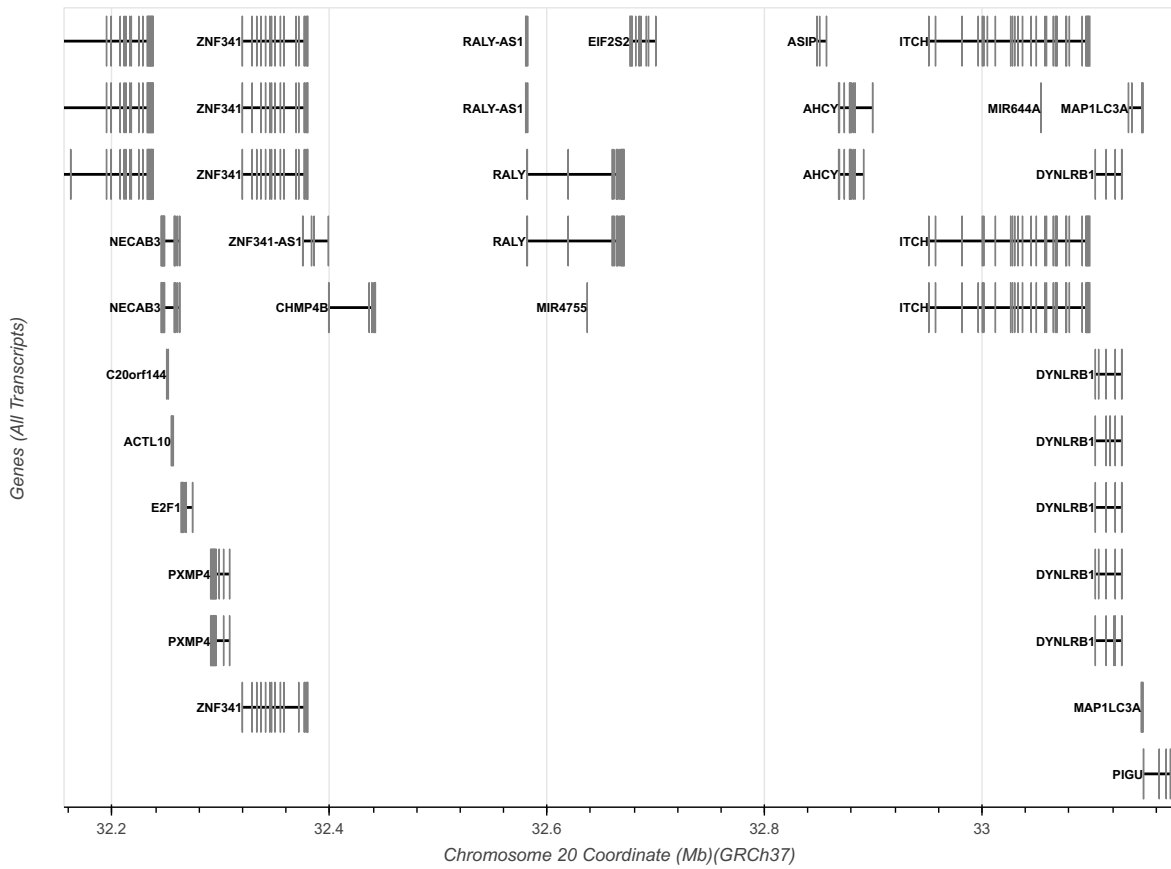



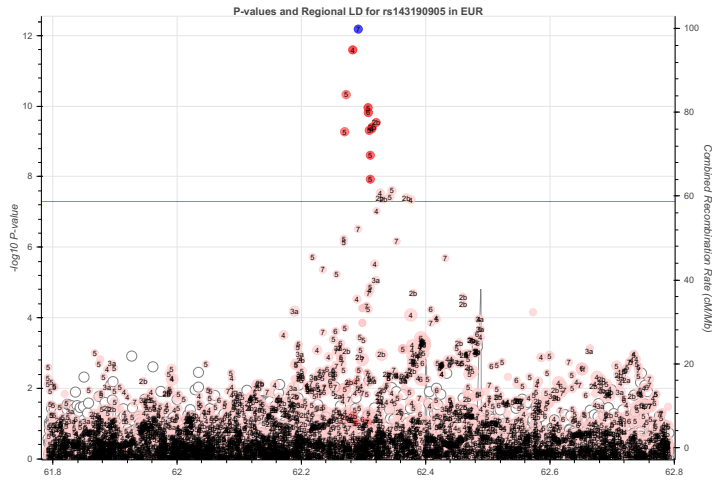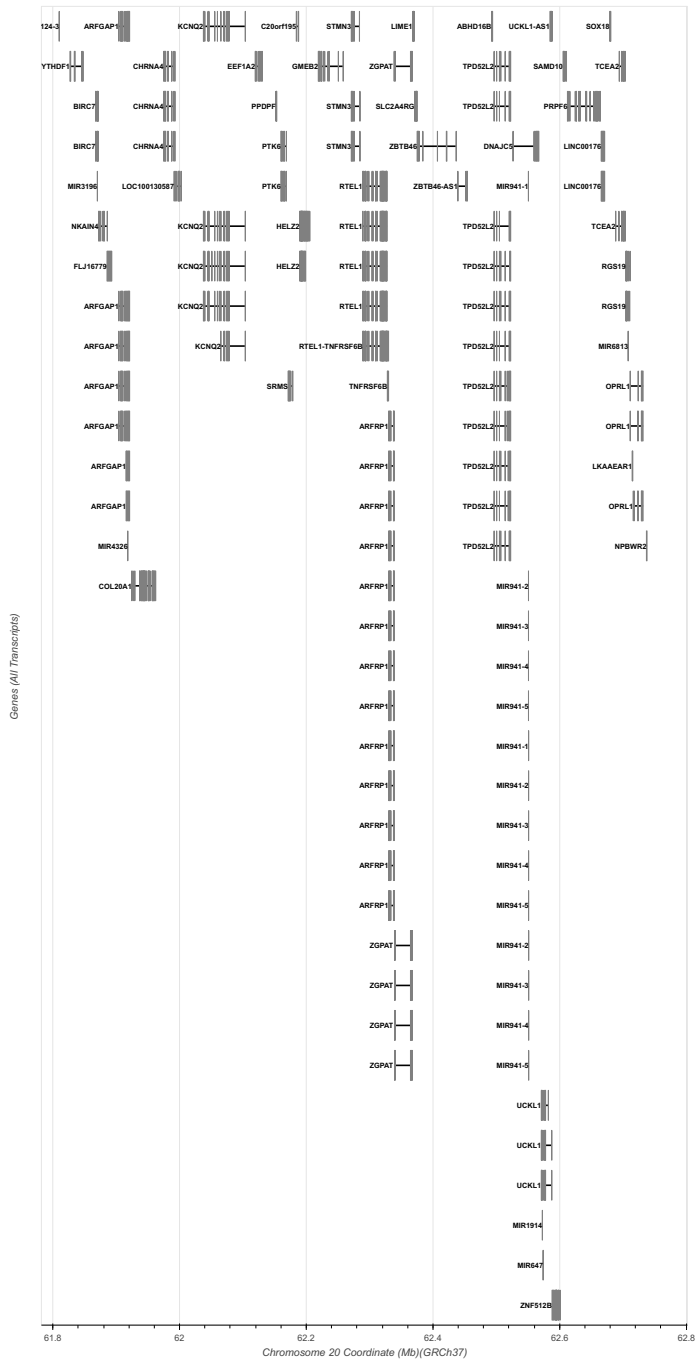

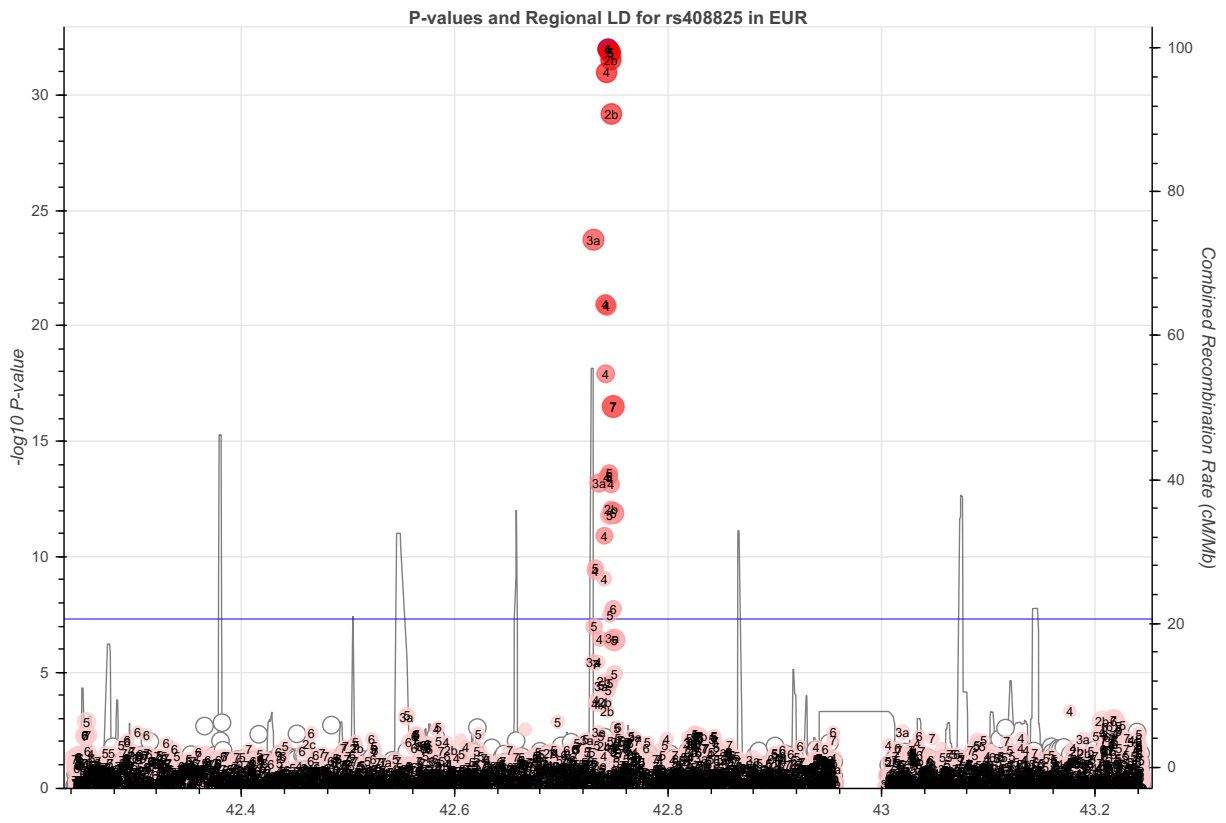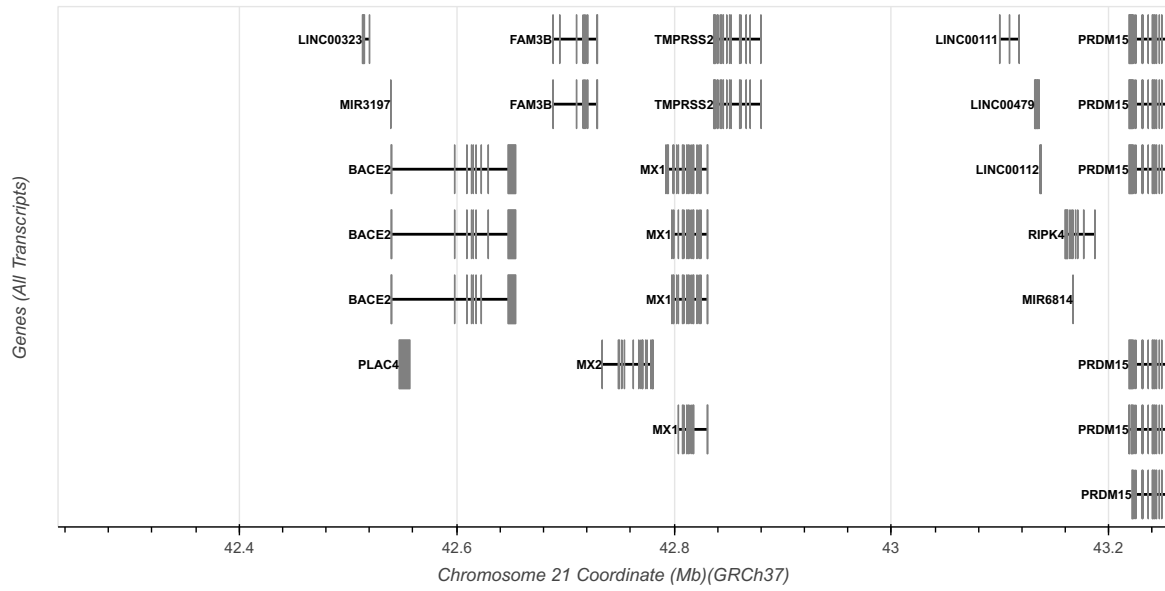

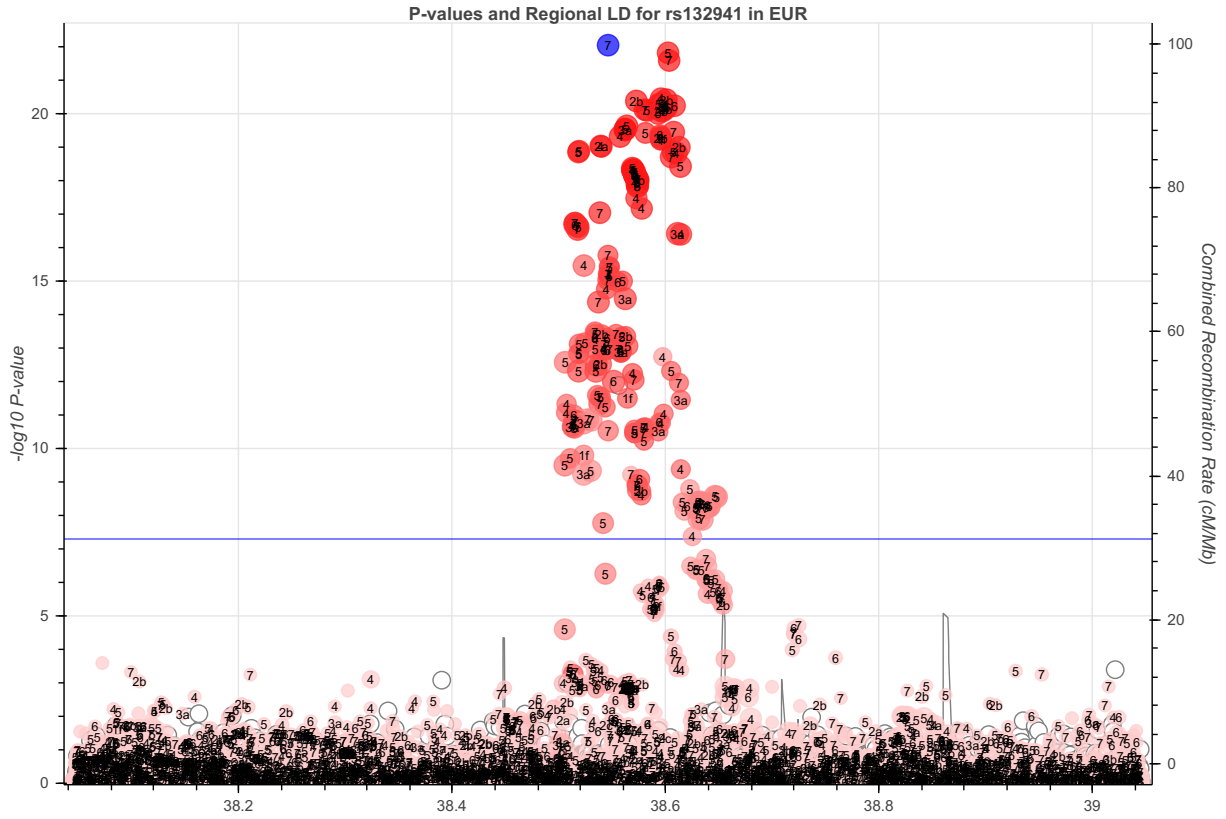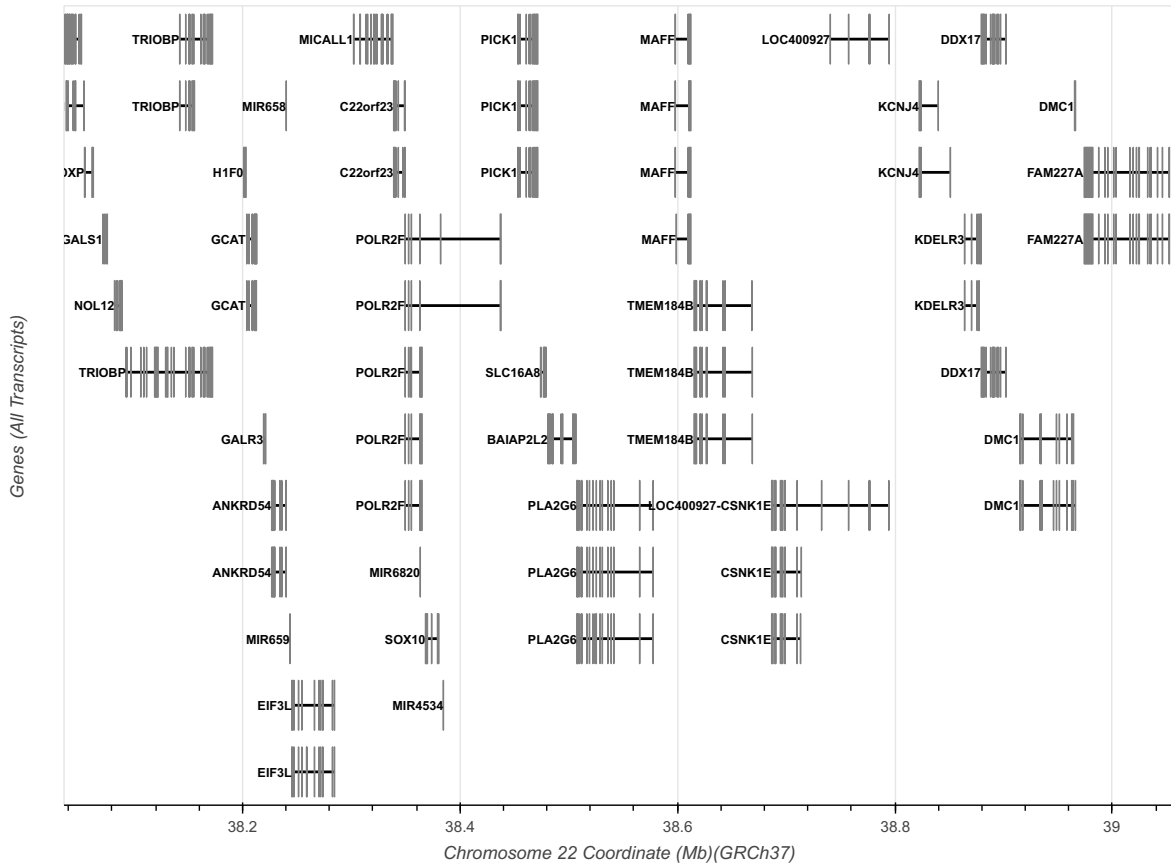

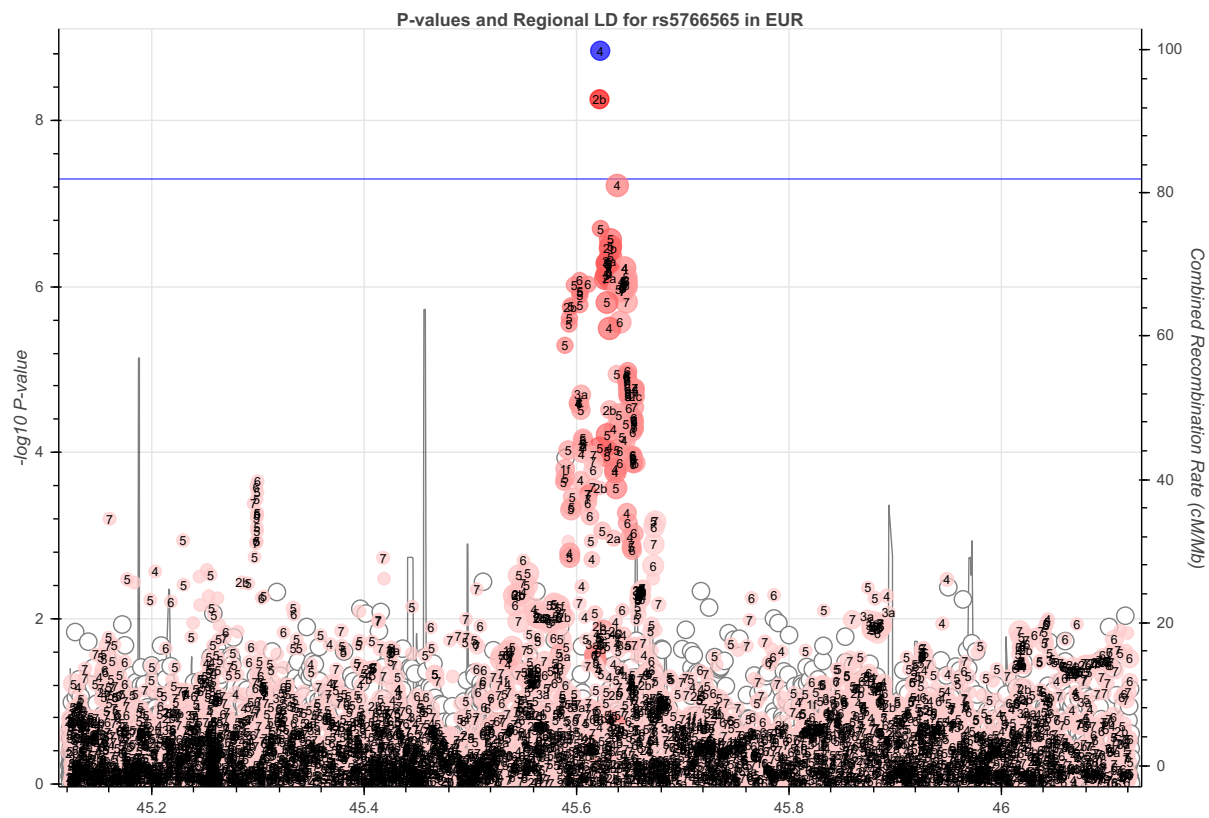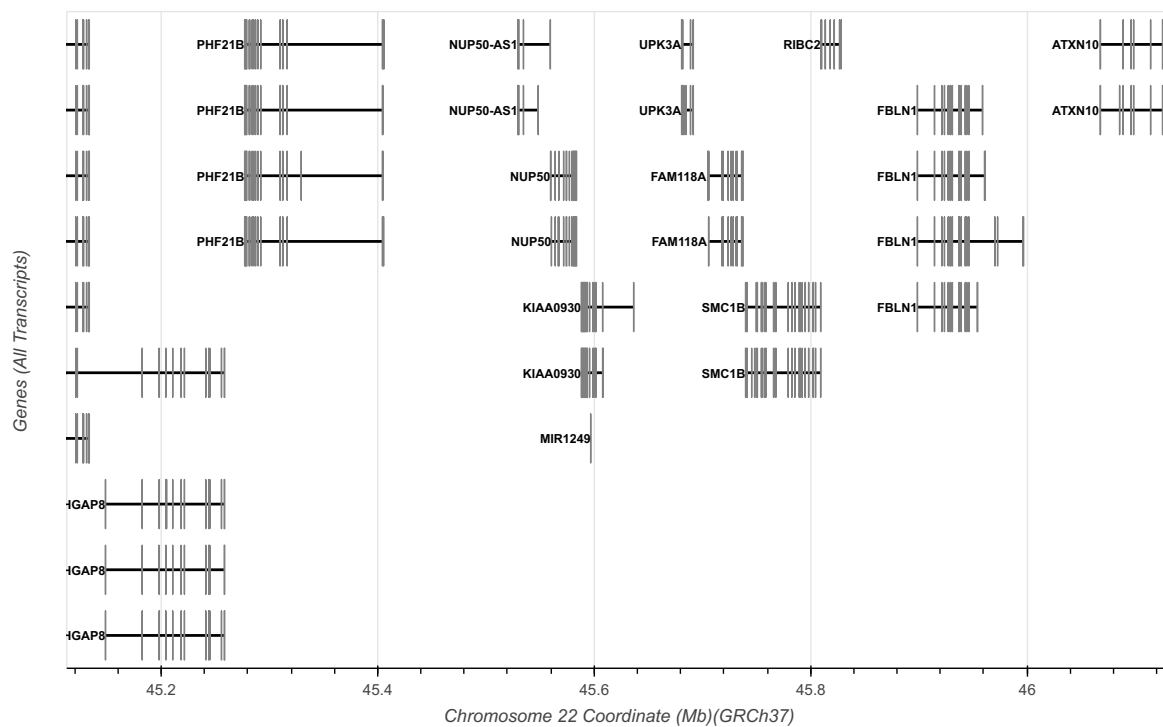

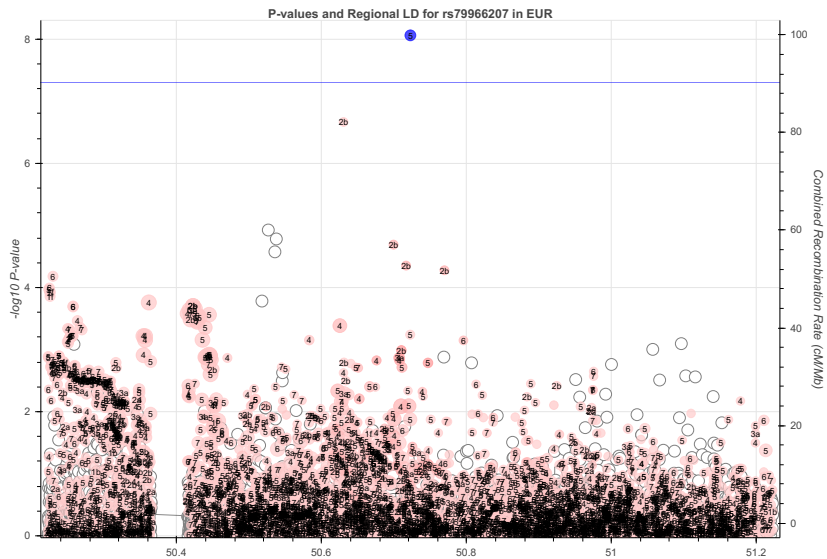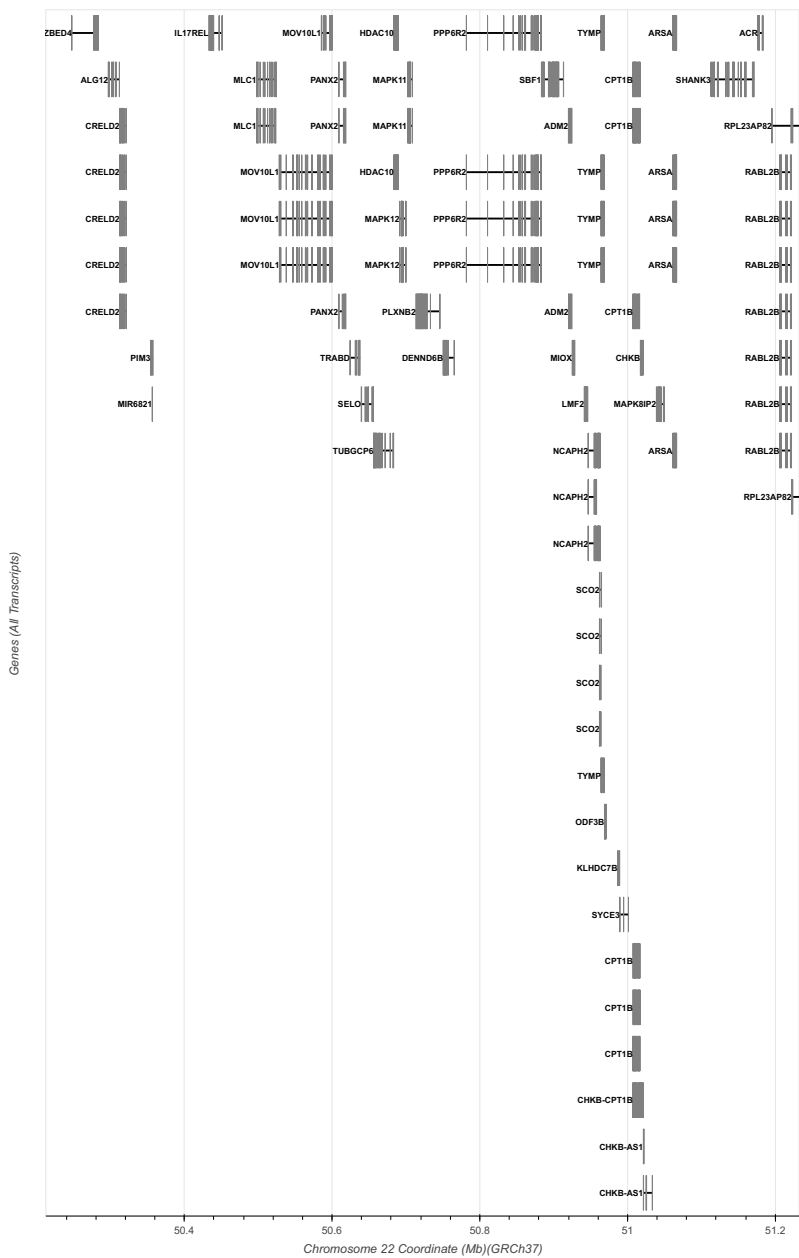

Supplement: NIHMS1574209-supplement-3.pdf [file NIHMS1574209-supplement-3.pdf]
